# Supplementary material
Source: publisher figshare collection journal article supplement (https://gsajournals.figshare.com/articles/dataset/_/8100749)
Supplement: Supplementary file 1 [file 1]

## Sheet: Sheet1
ORF	Name	Description	Ase1.LGR	Cdc11.LGR	Cop1.LGR	Dad2.LGR	Heh2.LGR	Hta2.LGR	Iqg1.LGR	Loa1.LGR	Nop10.LGR	Nuf2.LGR	Nup53.LGR	Om45.LGR	Pil1.LGR	Psr1.LGR	Pus1.LGR	Rad52.LGR	Sac6.LGR	Sec3.LGR	Sec7.LGR	Sec63.LGR	SKL.LGR	Vph1.LGR	Vps35.LGR	Nud1.LGR	Spc42.LGR	Spc72.LGR	Spc110N.LGR	Spc110C.LGR
YAL001C	TFC3	Subunit of RNA polymerase III transcription initiation factor complex; part of the TauB domain of TFIIIC that binds DNA at the BoxB promoter sites of tRNA and similar genes; cooperates with Tfc6p in DNA binding; largest of six subunits of the RNA polymerase III transcription initiation factor complex (TFIIIC)	-0.061305	0.0615	-0.0279788	0.0381	0.027035	-0.0075075	-0.0288438	-0.112583	-0.0750162	-0.067285	-0.06722	-0.023785	0.0749875	0.011545	0.12283	0.0331575	-0.135518	-0.0013	0.0750675	-0.0487075	0.0091975	0.0115175	-0.05123	0.663578	-0.257564	0.128144	0.030305	-0.139751
YAL002W	VPS8	Membrane-binding component of the CORVET complex; involved in endosomal vesicle tethering and fusion in the endosome to vacuole protein targeting pathway; interacts with Vps21p; contains RING finger motif	-0.0185375	-0.156073	-0.070685	-0.0467825	-0.188701	-0.0232613	0.105916	-0.0859188	0.0743287	-0.044705	-0.0019525	-0.0672062	-0.0228462	-0.0552038	-0.00655	-0.00337375	-0.007405	-0.0272812	-0.0146825	-0.08114	-0.0365163	-0.0253325	0.0827263	-0.191098	-0.079155	-0.0625225	-0.029675	-0.118582
YAL004W		Dubious open reading frame; unlikely to encode a functional protein, based on available experimental and comparative sequence data; completely overlaps verified gene SSA1/YAL005C	0.0266238	-0.128764	0.0653388	-0.0290075	-0.0442287	-0.0173	-0.089075	-0.00074625	0.0252275	-0.0107225	-0.0253075	-0.0598262	-0.0399175	-0.02835	-0.0951188	0.00103875	0.014895	-0.0857138	0.110711	-0.0439838	0.0351938	-0.0065175	-0.0079975
YAL005C	SSA1	ATPase involved in protein folding and NLS-directed nuclear transport; member of HSP70 family; required for ubiquitin-dependent degradation of short-lived proteins; forms chaperone complex with Ydj1p; localized to nucleus, cytoplasm, cell wall; 98% identical to paralog Ssa2p with different functional specificity in propagation of yeast [URE3] prions, vacuolar-mediated degradations of gluconeogene…	-0.0186325	0.1878	0.0369087	0.0652425	0.161944	-0.0134625	-0.187411	-0.0525875	0.0466188	-0.090025	-0.0997737	0.104847	0.00706	-0.08565	-0.107522	0.0779037	-0.00604	0.053525	-0.0645225	-0.126125	-0.01851	0.06596	0.062015	0.0408037	0.779724	-0.0379987	-0.0414825	0.0757788
YAL007C	ERP2	Member of the p24 family involved in ER to Golgi transport; similar to Emp24p and Erv25p; role in misfolded protein quality control; forms a heterotrimeric complex with Erp1p, Emp24p, and Erv25p; localized to COPII-coated vesicles; ERP2 has a paralog, ERP4, that arose from the whole genome duplication	-0.037225	-0.0265562	-0.035685	0.0331062	-0.0677587	-0.0144975	0.0689875	0.130961	-0.09372	-0.00202	-0.007035	-0.0980488	-0.0851187	-0.0963087	0.0885488	0.0399725	-0.016905	-0.0572125	0.00761625	-0.011295	-0.0301013	-0.026725	-0.0721062	-0.00881	1.21975	-0.049565	0.186871	-0.116627
YAL008W	FUN14	Integral mitochondrial outer membrane (MOM) protein; dosage suppressor of an MDM10 null that reduces ERMES-related phenotypes, such as alterations in mitochondrial morphology, protein complex assembly, and lipid profile; dosage suppressor of MDM12, MDM34, and MMM1 null mutant growth defects; novel mechanism of MOM import involving Tom70p, the TOM complex, and the TIM23 complex, requiring mitochon…	0.0101688	0.0725613	0.02877	-0.0114125	-0.0280138	-0.04178	-0.0490612	-0.0820963	0.0693638	-0.054375	0.031865	-0.0780075	-0.0329887	0.06768	0.0263475	-0.0002175	0.00588	-0.0703925	0.04703	0.036075	0.04409	-0.0067325	0.012335	-0.08756	-0.028015	-0.01668	0.489356	0.22879
YAL009W	SPO7	Putative regulatory subunit of Nem1p-Spo7p phosphatase holoenzyme; regulates nuclear growth by controlling phospholipid biosynthesis, required for normal nuclear envelope morphology, premeiotic replication, and sporulation	0.0434275	0.0498025	-0.03559	0.165495	0.0458675	-0.0067075	0.071555	0.004865	-0.035965	0.135265	-0.05821	0.024265	0.0353625	0.0971575	0.0326825	-0.0706475	0.13685	0.04186	-0.157617	-0.095865	-0.107463	0.0611725	0.01214	0.38415	0.23588	-0.07442	0.234274	0.050845
YAL010C	MDM10	Subunit of both the ERMES and the SAM complex; component of ERMES complex which acts as a molecular tether between the mitochondria and the ER, necessary for efficient phospholipid exchange between organelles and for mitophagy; SAM/TOB complex component that functions in the assembly of outer membrane beta-barrel proteins; involved in mitochondrial inheritance and morphology; ERMES complex is oft…	0.0471512	-0.0319612	0.0445762	0.0474212	0.20683	-0.0169275	-0.06781	-0.0341075	0.02245	0.0168762	0.0469538	-0.0612725	0.0184838	-0.0242775	-0.039775	-0.0159075	-0.0715637	-0.0613775	-0.03944	0.1124	0.06213	-0.138029	-0.0632125
YAL011W	SWC3	Protein of unknown function; component of the SWR1 complex, which exchanges histone variant H2AZ (Htz1p) for chromatin-bound histone H2A; required for formation of nuclear-associated array of smooth endoplasmic reticulum known as karmellae	0.107736	0.0178762	0.0842475	0.00297375	0.106291	-0.00149	0.203932	-0.1014	-0.00558875	0.10543	-0.009095	-0.0852075	0.139891	-0.018095	-0.02782	0.165437	-0.082655	0.0544025	0.125057	0.115608	-0.05151	-0.088455	0.147216	-0.0377175	0.0659775	-0.071225	0.0830738	0.0136288
YAL012W	CYS3	Cystathionine gamma-lyase; catalyzes one of the two reactions involved in the transsulfuration pathway that yields cysteine from homocysteine with the intermediary formation of cystathionine; protein abundance increases in response to DNA replication stress	0.055555	0.0636313	-0.0831175	0.0673162	0.0828363	-0.0640175	-0.0300662	-0.0167587	0.0118425	0.058695	-0.0116763	-0.082315	-0.056635	0.0125175	0.233835	0.0830637	-0.0982175	0.0399025	0.0511863	-0.0465575	0.287008	-0.02575	0.00195		0.4026	0.368715	-0.0303425	0.0547575
YAL013W	DEP1	Component of the Rpd3L histone deacetylase complex; required for diauxic shift-induced histone H2B deposition onto rDNA genes; transcriptional modulator involved in regulation of structural phospholipid biosynthesis genes and metabolically unrelated genes, as well as maintenance of telomeres, mating efficiency, and sporulation	0.01114	0.0622775	-0.00255375	-0.05222	0.383285	0.0582113	-0.116032	0.05986	0.14049	0.053845	0.0520437	0.144489	-0.0514887	0.09217	-0.156427	0.0175125	-0.245935	-0.178863	-0.0364862	0.0137988	0.0209088	-0.128404	0.062215
YAL014C	SYN8	Endosomal SNARE related to mammalian syntaxin 8	-0.0322475	0.196109	-0.0491962	0.0552388	0.14416	-0.0156563	0.0011025	0.141394	-0.122759	-0.07564	-0.0275213	-0.0566425	0.00108	0.0153037	0.0111275	-0.0271175	-0.129515	0.0279575	0.0650775	0.0179725	0.0400775	-0.0410975	0.00420375	-0.101263	0.0295012	-0.180029	0.082075	0.347719
YAL015C	NTG1	DNA N-glycosylase and apurinic/apyrimidinic (AP) lyase; involved in base excision repair; acts in both nucleus and mitochondrion; creates a double-strand break at mtDNA origins that stimulates replication in response to oxidative stress; required for maintaining mitochondrial genome integrity; NTG1 has a paralog, NTG2, that arose from the whole genome duplication	-0.0526612	-0.0485062	0.0269388	-0.04508	-0.107335	-0.0470925	-0.0166112	0.074845	-0.03866	0.0863462	-0.0292663	-0.012235	-0.206694	-0.0461575	0.030635	0.0193588	-0.207281	0.0380225	-0.136955	0.030495	-0.146874	0.0235988	0.034055	7.25e-05	0.00839625	-0.032525	0.0621125	0.301351
YAL017W	PSK1	PAS domain-containing serine/threonine protein kinase; coordinately regulates protein synthesis and carbohydrate metabolism and storage in response to a unknown metabolite that reflects nutritional status; PSK1 has a paralog, PSK2, that arose from the whole genome duplication	-0.047115	0.00854	-0.0086425	0.0101513	-0.0195412	0.0206563	-0.041095	0.0048775	0.0449875	0.157115	-0.0334925	0.0060525	0.0198762	0.00551625	0.151347	0.0400925	0.0404975	-0.147004	-0.0448675	-0.0033925	-0.0370775	0.0485375	-0.0294525	-0.0180675	0.0226713	0.0311638	-0.0682388	0.0543175
YAL018C	LDS1	Protein Involved in spore wall assembly; localizes to lipid droplets found on or outside of the prospore membrane; shares similarity with Lds2p and Rrt8p, and a strain mutant for all 3 genes exhibits reduced dityrosine fluorescence relative to the single mutants	-0.0129175	0.138063	-0.00379625	0.0138775	-0.0050175	0.00345625	-0.0390713	0.0134837	0.0497563	-0.208553	0.00593875	0.0255625	-0.0322262	-0.00734375	-0.00801	-0.0173875	-0.09157	-0.0699512	0.0641212	0.00651875	-0.028505	-0.0224025	-0.0773988
YAL020C	ATS1	Protein required for modification of wobble nucleosides in tRNA; acts with Elongator complex, Kti11p, and Kti12p; has a potential role in regulatory interactions between microtubules and the cell cycle; forms a stable heterodimer with Kti11p	0.0134875	-0.0722937	-0.0019125	-0.0314338	-0.191197	-0.022845	0.0110075	-0.0753962	-0.00971875	0.0404	-0.065165	0.0555475	-0.060525	-0.0218188	0.0691875	-0.0027425	0.0303463	0.0146075	-0.07587	-0.0361913	-0.0526612	-0.245111	-0.0397337
YAL021C	CCR4	Component of the CCR4-NOT transcriptional complex; CCR4-NOT is involved in regulation of gene expression; component of the major cytoplasmic deadenylase, which is involved in mRNA poly(A) tail shortening	-0.0991625	0.0995862	0.0747338	-0.0394613	2.26292	-0.04365	-0.14269	0.504226	-0.0864188	0.029265	0.0012875	2.03626	0.359969	1.20893	0.0886225	0.206086	0.0864738	-0.017915	1.02753	1.57895	0.0131737	0.476951	0.119928	-0.152064	-0.06643	-0.07678	-0.211409	-0.209792
YAL022C	FUN26	High affinity, broad selectivity, nucleoside/nucleobase transporter; vacuolar membrane localized transporter which may regulate the balance of nicotinamide riboside (NmR) levels between the cytosol and vacuole, contributing to salvage of NmR for use in cytosolic NAD+ synthesis; equilibrative nucleoside transporter (ENT) family member	-0.08286	0.019785	0.01434	0.00207375	-0.110025	0.0175725	-0.018255	0.006975	0.071495	-0.0304875	0.0085675	-0.0156	0.06658	0.07513	-0.0006625	0.0363025	0.269597	-0.0359413	-0.0740813	-0.0647275	-0.0753225	-0.0460725	0.0219288
YAL023C	PMT2	Protein O-mannosyltransferase of the ER membrane; transfers mannose residues from dolichyl phosphate-D-mannose to protein serine/threonine residues; involved in ER quality control; acts in a complex with Pmt1p, can instead interact with Pmt5p; antifungal drug target; PMT2 has a paralog, PMT3, that arose from the whole genome duplication	-0.0285025	-0.0282475	0.0964862	0.0283137	-0.0349425	-0.008265	-0.0907575	0.661118	-0.0039375	-0.0422787	0.049535	-0.05577	-0.0318625	0.020915	-0.014935	-0.0587175	-0.097465	-0.0487625	-0.0566538	-0.0357838	-0.0606	-0.07901	-0.0397125	-0.385695	-0.0197225	-0.125019	-0.0105538	-0.0727063
YAL024C	LTE1	Protein similar to GDP/GTP exchange factors; without detectable GEF activity; required for asymmetric localization of Bfa1p at daughter-directed spindle pole bodies and for mitotic exit at low temperatures	-0.056535	-0.086485	-0.0311613	0.0087425	0.112062	0.00873	0.042005	0.15348	0.0351288	0.13372	-0.0141213	0.0106025	0.082165	0.0758575	-0.045215	-0.00372	0.055685	0.02708	0.285392	0.079235	-0.0997	0.06796	0.0652975	-0.0526175	-0.0632325	0.0315513	0.0584575	-0.0389712
YAL025C	MAK16	Essential nuclear protein; constituent of 66S pre-ribosomal particles; required for maturation of 25S and 5.8S rRNAs; required for maintenance of M1 satellite double-stranded RNA of the L-A virus	-0.167813	0.150081	-0.061285	-0.00014	-0.145136	0.0391788	0.03422	-0.123092	0.0394925	-0.0434037	-0.0289037	-0.0108313	-0.0260813	0.0202638	-0.0122288	0.01892	0.01897	-0.0230075	-0.0882238	-0.0694663	-0.0770462	-0.149352	-0.0039325
YAL026C	DRS2	Trans-golgi network aminophospholipid translocase (flippase); maintains membrane lipid asymmetry in post-Golgi secretory vesicles; contributes to clathrin-coated vesicle formation, endocytosis, protein trafficking between the Golgi and endosomal system and the cellular response to mating pheromone; autoinhibited by its C-terminal tail; localizes to the trans-Golgi network; mutations in human homo…	-0.05455	0.013875	-0.179245	0.0112287	0.341045	0.016745	0.0697575	0.0364875	0.135137	0.041755	-0.035735	0.167307	-0.03444	0.0767175	0.06867	-0.0143525	-0.02466	0.0964525	0.070255	0.552458	0.103733	-0.0005725	-0.09601	0.0851763	0.137822	0.0239712	0.28344	0.007085
YAL027W	SAW1	5'- and 3'-flap DNA binding protein; recruits Rad1p-Rad10p to single-strand annealing intermediates with 3' non-homologous tails for removal during double-strand break repair; complexes with Rad1p-Rad10p and stimulates its endonuclease activity; green fluorescent protein (GFP)-fusion protein localizes to the nucleus	0.0381787	-0.03823	-0.03709	0.03469	-0.00988125	-0.09979	-0.124823	0.001225	0.0456575	-0.01585	0.148704	-0.0616175	0.00099375	-0.0495875	-0.0336175	0.00352	0.01733	-0.0461775	-0.0338875	0.0570325	0.127708	-0.0176037	0.056395	0.308621	-0.109785	-0.0443962	-0.0339875	0.0430475
YAL028W	FRT2	Tail-anchored ER membrane protein of unknown function; interacts with homolog Frt1p; promotes growth in conditions of high Na+, alkaline pH, or cell wall stress, possibly via a role in posttranslational translocation; potential Cdc28p substrate; FRT2 has a paralog, FRT1, that arose from the whole genome duplication	0.047245	-0.237228	0.0823312	-0.00712875	-0.11605	0.0692125	-0.061535	0.155829	-0.06071	0.0399975	-0.0256925	0.0230137	0.134486	-0.0384212	0.0640913	-0.029565	-0.03683	-0.136925	0.105991	-0.0038975	0.00488625	-0.02399	0.0732375
YAL029C	MYO4	Type V myosin motor involved in actin-based transport of cargos; required for mRNA transport, including ASH1 mRNA, and facilitating the growth and movement of ER tubules into the growing bud along with She3p; MYO4 has a paralog, MYO2, that arose from the whole genome duplication	-0.0167	-0.217206	-0.002005	-0.0602938	-0.0880075	-0.00756875	-0.0738025	0.323003	-0.02887	0.0494112	-0.0016725	-0.084715	-0.0601163	-0.0137612	0.00460875	-0.0137825	-0.123838	-0.0365463	0.0052525	-0.0316987	0.003035	-0.006615	-0.0730563	1.16129	0.395463	0.455646	0.347469	-0.326304
YAL030W	SNC1	Vesicle membrane receptor protein (v-SNARE); involved in the fusion between Golgi-derived secretory vesicles with the plasma membrane; proposed to be involved in endocytosis; member of the synaptobrevin/VAMP family of R-type v-SNARE proteins; SNC1 has a paralog, SNC2, that arose from the whole genome duplication	0.02862	0.09117	0.0923275	0.0411888	0.09756	0.0153863	0.0222137	0.142459	0.0674237	0.2308	0.0386375	-0.163387	0.0733162	0.009025	0.131559	0.313091	0.0318338	-0.0352825	0.0822462	-0.0162875	-0.109481	0.0656275	0.0794412
YAL031C	GIP4	Cytoplasmic protein that regulates protein phosphatase 1 Glc7p; protein overexpression relocalizes Glc7p from the nucleus and prevents chromosome segregation; potential Cdc28p substrate	0.0620525	-0.2503	0.00644125	0.074785	-0.087365	-0.0222413	0.0810137	-0.00768375	0.0106925	0.0097175	-0.0349838	-0.0959437	0.0383625	-0.00532	0.108722	0.0696112	-0.0349475	-0.0594125	0.03198	0.0051675	0.08462	0.00676875	-0.0383788	0.083515	0.091395	-0.164977	-0.22727	-0.0939663
YAL032C	PRP45	Protein required for pre-mRNA splicing; associates with the spliceosome and interacts with splicing factors Prp22p and Prp46p; orthologous to human transcriptional coactivator SKIP and can activate transcription of a reporter gene	-0.063565	-0.043855	-0.07223	0.0136363	-0.0808088	0.049415	0.124272	0.0511375	0.0115925	0.023855	0.0076475	0.0056825	0.10339	-0.012995	-0.25807	-0.0624675	0.09876	-0.00066	0.158044	0.055525	-0.02198	0.0117425	0.0182375	0.145046	0.00016125	-0.0618375	-0.017755	-0.0032025
YAL033W	POP5	Subunit of both RNase MRP and nuclear RNase P; RNase MRP cleaves pre-rRNA, while nuclear RNase P cleaves tRNA precursors to generate mature 5' ends and facilitates turnover of nuclear RNAs	-0.00137625	-0.130158	0.0409988	-0.10992	-0.193455	-0.0475525	0.002495	0.0587587	-0.0833788	0.0506988	-0.0411263	-0.00804625	-0.0243987	0.0446862	0.107221	0.0207025	-0.00534	-0.0760338	0.050795	-0.0330037	-0.0201962	0.0162062	0.0025725	-0.113315	-0.02665	0.0564287	-0.111594	-0.0594913
YAL034C	FUN19	Non-essential protein of unknown function; expression induced in response to heat stress; FUN19 has a paralog, YOR338W, that arose from the whole genome duplication	0.0068825	-0.02537	0.07087	0.010425	0.065055	-0.0302275	0.08615	-0.0326787	0.078535	-0.0025175	0.0698775	0.0920025	0.08163	0.0697525	-0.04315	-0.0874675	0.0840775	0.06723	0.0312475	-0.00590625	-0.0003425	-0.0087625	0.0021625
YAL034W-A	MTW1	Essential component of the MIND kinetochore complex; joins kinetochore subunits contacting DNA to those contacting microtubules; critical to kinetochore assembly; complex consists of Mtw1p Including Nnf1p-Nsl1p-Dsn1p (MIND)	0.0081675	0.0433137	-0.017465	0.0946075	0.055575	0.0171062	0.175029	-0.148075	0.226585	-0.0830425	0.0322362	-0.0405887	0.0243538	0.0620525	0.001665	-0.0353687	0.0272125	0.0208062	0.0113025	-0.117303	0.0103225	0.13178	0.101905	1.15849	-0.100208	0.869385	1.07126	0.0294837
YAL035W	FUN12	Translation initiation factor eIF5B; GTPase that promotes Met-tRNAiMet binding to ribosomes and ribosomal subunit joining; promotes GTP-dependent maturation of 18S rRNA by Nob1p; protein abundance increases in response to DNA replication stress; homolog of bacterial IF2	-0.0378713	0.201338	0.105288	0.0712062	-0.0645175	0.00117625	-0.0473537	0.11167	0.0909013	0.270895	-0.0391787	0.144929	0.301211	-0.038685	0.08461	0.0260025	0.284236	0.0299675	0.201296	0.00538	0.0171738	-0.0160775	0.0183138	-0.00248	0.291371	0.191339	0.00528625	0.0288237
YAL036C	RBG1	Member of the DRG family of GTP-binding proteins; associates with translating ribosomes; interacts with Tma46p, Ygr250cp, Gir2p and Yap1p via two-hybrid	0.041105	-0.0197238	-0.01991	-0.0459663	-0.0658688	-0.0579125	-0.0862737	-0.0348	-0.0251075	-0.02333	-0.0378387	-0.09138	-0.0391075	-0.049175	-0.0476575	0.0111225	-0.0609838	-0.0492	-0.0015575	-0.018825	0.0246425	-0.0693725	-0.056415	-0.0506562	-0.041355	-0.0329088	-0.069215	-0.042415
YAL037W		Putative protein of unknown function; YAL037W has a paralog, YOR342C, that arose from the whole genome duplication	0.032825	0.0693325	-0.0508325	0.0161	0.0859375	-0.0292125	-0.0997312	0.0946213	0.0169387	0.0308287	0.113386	0.018255	-0.03916	-0.0118087	0.03	0.077745	0.00766375	0.01621	0.0040625	0.033265	0.111977	-0.03452	0.0473625
YAL038W	CDC19	Pyruvate kinase; functions as a homotetramer in glycolysis to convert phosphoenolpyruvate to pyruvate, the input for aerobic (TCA cycle) or anaerobic (glucose fermentation) respiration; regulated via allosteric activation by fructose bisphosphate; CDC19 has a paralog, PYK2, that arose from the whole genome duplication	-0.137516		-0.00052875	-0.0444288		-0.0373875	-0.02925	-0.0281538	0.149834	0.045785	0.0799863	0.194335	0.01056	0.0010625			0.24671	0.0561425	-0.179186	0.0894988	-0.147875	0.213888	0.129763	-0.267697	0.535478	-0.0721237	0.07989	0.446214
YAL039C	CYC3	Cytochrome c heme lyase (holocytochrome c synthase); attaches heme to apo-cytochrome c (Cyc1p or Cyc7p) in mitochondrial intermembrane space; human homolog HCCS implicated in microphthalmia with linear skin defects (MLS), and can complement yeast null mutant	-0.123909	-0.0344788	0.0921425	-0.00897375	0.104675	0.150462	0.19206	-0.0178825	-0.061885	-0.296446	-0.122904	0.267105	-0.07868	0.0919637	-0.0804075	-0.0333025	0.0019175	0.163096	0.339219	-0.115479	-0.244576	0.0128612	0.08818	-0.037965	0.0138475	-0.10216	-0.06084	-0.110437
YAL040C	CLN3	G1 cyclin involved in cell cycle progression; activates Cdc28p kinase to promote G1 to S phase transition; plays a role in regulating transcription of other G1 cyclins, CLN1 and CLN2; regulated by phosphorylation and proteolysis; acetyl-CoA induces CLN3 transcription in response to nutrient repletion to promote cell-cycle entry; cell cycle arrest phenotype of the cln1 cln2 cln3 triple null mutant…	-0.0110738	0.040085	0.139455	-0.0134313	-0.000245	0.0289963	0.12561	-0.0487	-0.0260837	-0.153009	-0.02038	0.0157025	-0.34571	0.0723175	-0.00116375	-0.0525137	-0.0967875	-0.12897	-0.391603	-0.0297812	-0.0659775	-0.04679	0.114835
YAL041W	CDC24	Guanine nucleotide exchange factor (GEF) for Cdc42p; required for polarity establishment and maintenance, and mutants have morphological defects in bud formation and shmooing; relocalizes from nucleus to cytoplasm upon DNA replication stress; thermosensitivity of the cdc24-4 mutant in the presence of sorbitol is functionally complemented by human CDC42	-0.025705	0.194061	-0.0456638	0.0820238	0.739329	-0.0219662	0.0195425	0.536676	-0.152534	0.0868538	-0.03279	2.22543	1.06464	0.844791	-0.167011	-0.112433	-0.00756125	0.113231	1.50288	1.0492	-0.0193175	0.406867	0.516203	0.0205275	-0.171873	-0.0306975	0.0599025	-0.06415
YAL042W	ERV46	Protein localized to COPII-coated vesicles; forms a complex with Erv41p; involved in the membrane fusion stage of transport	-0.0164225	-0.03009	0.00697125	0.091475	-0.0048675	-0.063415	0.027055	0.198905	-0.044255	0.191005	0.012775	0.0405275	0.01172	-0.0434375	-0.010385	0.0093	-0.157273	0.05839	0.12521	0.023535	-0.118297	0.0028325	0.047735
YAL043C	PTA1	Subunit of holo-CPF; holo-CPF is a multiprotein complex and functional homolog of mammalian CPSF, required for the cleavage and polyadenylation of mRNA and snoRNA 3' ends; involved in pre-tRNA processing; binds to the phosphorylated CTD of RNAPII	0.248262	0.888232	0.17817	0.253875	0.561131	0.532385	0.317497	0.183145	0.69948	0.145941	0.0508412	0.257336	1.37384	0.535428	-0.140331	0.443997	-0.08097	0.209794	0.650179	0.346289	0.0789175	0.421186	0.279039	1.30183	0.356982	1.18707	0.730851	1.18545
YAL044C	GCV3	H subunit of the mitochondrial glycine decarboxylase complex; glycine decarboxylase is required for the catabolism of glycine to 5,10-methylene-THF; also required for all protein lipoylation; expression is regulated by levels of 5,10-methylene-THF	0.00494125	-0.11873	-0.03125	-0.07221	0.08934	-0.0194925	-0.0487238	0.155641	-0.112105	0.0328825	0.0222575	-0.0808413	-0.0192837	0.0367238	0.0735625	0.0975	-0.0859063	0.0037925	-0.0010975	0.0062275	-0.0418538	-0.00790375	-0.0354725	0.0348725	0.011095	-0.0090975	0.074425	-0.0457938
YAL044W-A	BOL1	Mitochondrial matrix protein involved in Fe-S cluster biogenesis; facilitates [4Fe-2S] cluster inception into mitochondrial proteins such as lipoate synthase and succinate dehydrogenase; interacts and may function with Grx5p at an early step in Fe-S cluster biosynthesis; forms dimeric complexes with Grx5p and Nfu1p that alter the stability of shared Fe/S clusters; sequence similarity to human BOL…	-0.07219	0.0068125	-0.0616013	0.0071225	-0.0323925	-0.0082975	0.0203788	-0.07334	0.0172575	-0.0434725	0.04979	-0.06336	0.030205	-0.0142925	-0.018615	-0.0069825	-0.0912637	-0.0619425	0.04311	0.036875	-0.01281	0.0629175	-0.01632
YAL045C		Dubious open reading frame; unlikely to encode a functional protein, based on available experimental and comparative sequence data; almost completely overlaps YAL044W-A	-0.0078		0.106618	0.0145475	-0.152392	-0.0764238	0.171898	-0.151379	-0.0222325	-0.124596	-0.265851	-0.085605	-0.03553	-0.0687888	0.0121063	-0.147235	-0.196765	-0.201737	-0.108289	-0.0376575	-0.134835	0.039415	0.07267
YAL046C	BOL3	Protein involved in Fe-S cluster transfer to mitochondrial clients; protects [4Fe-4S] clusters from damage due to oxidative stress by acting along with Nfu1p at a late step in the transfer of [4Fe-4S] clusters from the ISA complex to mitochondrial client proteins like lipoate synthase and succinate dehydrogenase; sequence similarity to human BOLA family member, BOLA3, mutations of which are assoc…	0.0255025	-0.258165	0.0750725	-0.0670613	-0.05605	-0.0257238	-0.138109	0.28312	-0.0327163	-0.0332125	0.0318325	-0.0353875	0.122063	0.077515	-0.021745	0.01078	0.120969	-0.03233	0.0817662	0.0142575	0.045455	-0.0271613	-0.0072725
YAL047C	SPC72	Gamma-tubulin small complex (gamma-TuSC) receptor; recruits the gamma-TuSC complex to the cytoplasmic side of the SPB, connecting nuclear microtubules to the SPB; involved in astral microtubule formation, stabilization, and with Stu2p, anchoring astral MTs at the cytoplasmic face of the SPB, and regulating plus-end MT dynamics; regulated by Cdc5 kinase	0.0208662	-0.749834	0.0919337	0.100394	-0.334137	0.00308	0.48438	-0.01496	-0.0407275	-0.023845	-0.0235075	1.1093	0.0726125	1.63093	0.0863987	-0.003055	-0.0394225	0.0200987	1.04327	0.242875	0.150363	0.18162	-0.0138175	0.0998175	-0.12144	0.039265	-0.0680025	0.07014
YAL048C	GEM1	Outer mitochondrial membrane GTPase, subunit of the ERMES complex; potential regulatory subunit of the ERMES complex that links the ER to mitochondria and may promote inter-organellar calcium and phospholipid exchange as well as coordinating mitochondrial DNA replication and growth; cells lacking Gem1p contain collapsed, globular, or grape-like mitochondria; ortholog of metazoan Miro GTPases	-0.06543	0.207605	0	0.0425525	-0.0056175	-0.0796213	-0.227449	0.14123	-0.03303	-0.08686	-0.0273087	-0.0300338	0.0429937	-0.0438175	-0.06735	-0.0698375	-0.002	-0.0411463	-0.279037	-0.07204	0.0283138	-0.00467	-0.0850325
YAL049C	AIM2	Cytoplasmic protein involved in mitochondrial function or organization; null mutant displays reduced frequency of mitochondrial genome loss; potential Hsp82p interactor	-0.0105975	-0.0418475	-0.04083	-0.105887	-0.161908	-0.0447125	-0.0041425	-0.0363287	-0.019495	-0.0240437	-0.0334663	0.02736	0.00703375	0.0021025	0.01646	-0.015265	-0.079575	0.0143625	0.0465825	-0.055785	-0.125845	-0.015305	-0.032685	-0.078445	0.0384413	-0.111568	0.0053975	0.144754
YAL051W	OAF1	Oleate-activated transcription factor; subunit of a heterodimeric complex with Pip2p, which binds to oleate-response elements (ORE) in the promoter of genes involved in beta-oxidation of fatty acids, peroxisome organization and biogenesis, activating transcription in the presence of oleate; regulates chromatin silencing at telomeres; involved in diauxic shift; OAF1 has a paralog, PIP2, that arose…	-0.00183	-0.131869	0.02349	0.05418	-0.0404287	0.0049025	-0.0811425	0.006175	-0.0085125	-0.0415075	0.0392162	0.0936325	0.0207775	0.068195	0.00602125	0.00367875	0.0159075	-0.0310437	-0.03892	-0.0452625	0.022265	-0.0596425	-0.029425
YAL053W	FLC2	Putative calcium channel involved in calcium release under hypotonic stress; required for uptake of FAD into endoplasmic reticulum; involved in cell wall maintenance; FLC2 has a paralog, YOR365C, that arose from the whole genome duplication	-0.156046	0.0933	-0.012745	0.0249725	0.185548	0.0458525	-0.0837063	-0.141241	-0.0189625	0.0247663	-0.0595487	0.0630575	0.0166862	-0.00989625	-0.0470363	-0.00528375	0.0163825	0.00289875	-0.05692	0.0153437	-0.0901862	-0.02917	0.030255	-0.215925	0.0672075	0.03884	-0.161853	-0.121618
YAL054C	ACS1	Acetyl-coA synthetase isoform; along with Acs2p, acetyl-coA synthetase isoform is the nuclear source of acetyl-coA for histone acetylation; expressed during growth on nonfermentable carbon sources and under aerobic conditions	0.0322438	-0.024325	-0.01196	-0.0602162	-0.0726625	-0.00012125	0.081705	-0.094085	-0.0421975	0.0635563	-0.0791275	-0.00111375	0.0510425	-0.049645	0.0284187	0.0470287	-0.0323587	-0.0239987	-0.115723	-0.0332713	0.0355338	-0.0221588	-0.0532813	-0.0354688	0.25065	-0.0151363	0.0303038	0.0705487
YAL055W	PEX22	Putative peroxisomal membrane protein; required for import of peroxisomal proteins; functionally complements a Pichia pastoris pex22 mutation	-0.0833913	-0.162171	-0.0124325	0.0177275	-0.0626587	0.0276	0.0442063	0.0613188	-0.196374	-0.0408875	-0.0088775	-0.014005	-0.0812662	0.0335	-0.0132375	-0.04259	0.0752625	0.0184775	-0.164325	-0.010465	0.0144075	-0.0150025	-0.0583725	-0.0303875	0.0102275	0.0178875	-0.00978	-0.0886988
YAL056W	GPB2	Multistep regulator of cAMP-PKA signaling; inhibits PKA downstream of Gpa2p and Cyr1p, thereby increasing cAMP dependency; inhibits Ras activity through direct interactions with Ira1p/2p; regulated by G-alpha protein Gpa2p; GPB2 has a paralog, GPB1, that arose from the whole genome duplication	-0.0272438	0.195069	-0.127048	-0.00121875	-0.299941	0.030305	-0.0355625	-0.05424	-0.103667	-0.0591262	0.0518875	0.0303288	-0.05535	-0.0489762	0.08785	0.06634	-0.0819112	0.06824	-0.00407875	-0.0987113	0.0331875	-0.0633713	-0.013695	-0.0270725	-0.0481725	-0.181668	-0.03595	-0.179037
YAL058W	CNE1	Calnexin; integral membrane ER chaperone involved in folding and quality control of glycoproteins; chaperone activity is inhibited by Mpd1p, with which Cne1p interacts; 24% identical to mammalian calnexin; Ca+ binding not yet shown in yeast	0.196775	0.0719163	0.055765	0.035345	0.0282113	0.0173175	0.0163613	0.155128	0.0797087	0.0458525	-0.0514088	0.08772	0.0939688	-0.125655	0.061525	-0.039335	-0.089145	0.050835	-0.111759	0.0040325	-0.027445	0.0828612	0.0746775	-0.179124	0.0549513	-0.0906825	-0.112604	-0.0226425
YAL059W	ECM1	Pre-ribosomal factor involved in 60S ribosomal protein subunit export; associates with the pre-60S particle; shuttles between the nucleus and cytoplasm	-0.0232375	0.00132125	-0.005665	0.252354	0.393519	0.102987	0.0143775	0.345109	0.490208	0.088905	0.02465	0.00086625	0.0961562	0.0298913	0.0688987	0.31739	-0.034585	-0.0470875	-0.0255387	0.163195	-0.0932038	0.031945	-0.150941	-0.184655	-0.414291	0.0059175	0.031565	0.0247487
YAL060W	BDH1	NAD-dependent (R,R)-butanediol dehydrogenase; catalyzes oxidation of (R,R)-2,3-butanediol to (3R)-acetoin, oxidation of meso-butanediol to (3S)-acetoin, and reduction of acetoin; enhances use of 2,3-butanediol as an aerobic carbon source	-0.0372175	0.075735	-0.0554175	0.105604	0.0425025	-0.015475	0.020425	0.0039325	-0.038045	-0.0794325	-0.021965	0.0542463	0.0959938	-0.0504763	0.01842	0.0122162	-0.051	-0.0740625	0.00586125	-0.00903875	-0.0618662	-0.027345	-0.0762937	0.0563437	0.34918	-0.0594675	-0.0358863	0.256155
YAL061W	BDH2	Putative medium-chain alcohol dehydrogenase with similarity to BDH1; transcription induced by constitutively active PDR1 and PDR3	0.04434	-0.040695	-0.07335	0.0100825	0.062605	-0.0182725	-0.232687	-0.344257	0.147219	-0.05224	0.077945	-0.0193225	-0.0140625	0.0208538	-0.0142538	0.0629862	0.045305	0.00021125	-0.0549137	-0.02226	-0.0382912	-0.028535	-0.080275	0.157477	0.167843	-0.373759	0.120505	0.0228388
YAL062W	GDH3	NADP(+)-dependent glutamate dehydrogenase; synthesizes glutamate from ammonia and alpha-ketoglutarate; rate of alpha-ketoglutarate utilization differs from Gdh1p; expression regulated by nitrogen and carbon sources; GDH3 has a paralog, GDH1, that arose from the whole genome duplication	-0.00372375	-0.0417887	0.0452225	-0.0648037	0.0548225	-0.0429975	-0.0450912	-0.00700625	-0.0008425	0.0317663	0.020025	-0.109588	0.0475138	-0.147495	-0.0492	0.021705	-0.130646	-0.0794887	0.018035	0.0612025	0.0476587	0.0161062	0.0316625
YAL063C	FLO9	Lectin-like protein with similarity to Flo1p; thought to be expressed and involved in flocculation	0.0340625	0.208643	-0.0243325	0.0147212	0.0715937	-0.0062225	0.05405	-0.0256875	0.0008	-0.101774	0.00890625	0.0252375	0.00041625	-0.0236975	0.0281725	0.0302763	-0.0002875	0.00248	-0.0156363	-0.0156938	-0.01138	-0.0033075	-0.0194675
YAL064C-A	TDA8	Putative protein of unknown function; null mutant is sensitive to expression of the top1-T722A allele; not an essential gene	-0.00583625	-0.025035	-0.04719	-0.0250425	-0.0805663	-0.0134075	0.0198875	0.104031	0.04068	-0.0964088	0.0446525	-0.0341525	-0.05773	0.08542	0.0436825	0.13471	-0.0157363	-0.083535	-0.025785	-0.023535	0.0455825	0.0170775	0.051325
YAL064W		Protein of unknown function; may interact with ribosomes, based on co-purification experiments	-8.75e-05	-0.0380763	0.0335125	0.0017925	-0.0704825	-0.0364512	-0.0746475	0.0513837	0.0463675	0.0293937	-0.0635337	-0.01337	0.0446575	0.00305625	-0.0233887	-0.07064	-0.0485725	0.0623475	0.137349	-0.02587	0.112727	-0.0167825	-0.00303
YAL064W-B		Fungal-specific protein of unknown function	0.114335	0.02991	-0.0228675	-0.03177	-0.0344775	0.00093	-0.0716875	-0.118392	0.0384987	0.0138175	-0.00860125	-0.0393675	0.04505	0.017325	0.0406625	0.11765	-0.01049	-0.009575	-0.00248	0.02143	0.06465	-0.00288	0.01525
YAL065C		Putative protein of unknown function; shows sequence similarity to FLO1 and other flocculins	-0.01682	-0.356928	-0.120512	0.0031025	-0.0205425	0.0214125	0.0662737	-0.172072	-0.064815	0.0268012	0.0463975	0.234214	0.00099625	-0.0254625	0.033875	0.0134	-0.299758	0.0541075	-0.158805	0.083965	-0.150753	-0.03531	0.017025
YAL066W		Dubious open reading frame; unlikely to encode a functional protein, based on available experimental and comparative sequence data	-0.046615	-0.072995	0.0023575	-0.111254	0.0369312	0.05054	-0.212055	-0.216392	-0.0887325	0.139593	-0.0420063	0.058445	0.0411087	-0.03603	0.04078	0.008205	0.27983	0.02243	-0.223116	0.0836425	-0.143045	-0.00149	0.0488025
YAL067C	SEO1	Putative permease; member of the allantoate transporter subfamily of the major facilitator superfamily; mutation confers resistance to ethionine sulfoxide	-0.07132	0.107709	0.02873	0.0134212	-0.272952	0.01894	-0.0319975	-0.02954	0.05003	0.00101	0.014085	0.000495	-0.0013025	0.00524	-0.00114	0.02538	-0.0527	-0.016425	-0.0537987	-0.00045	0.0630488	-0.0762962	0.0146475
YAL069W		Dubious open reading frame; unlikely to encode a functional protein, based on available experimental and comparative sequence data	-0.10572	0.0523212	-0.027585	-0.0627825	0.525655	0.0116537	0.0197875	0.232876	-0.035645	-0.0585888	-0.0132637	-0.011005	0.001445	0.136801	0.0139813	0.00602	0.194595	0.025755	0.176956	-0.02128	0.01689	0.01931	-0.041285
YAR002C-A	ERP1	Member of the p24 family involved in ER to Golgi transport; role in misfolded protein quality control; forms heterotrimeric complex with Erp2p, Emp24p, and Erv25p; localized to COPII-coated vesicles; ERP1 has a paralog, ERP6, that arose from the whole genome duplication	0.0225163	-0.133305	0.0285162	0.10332	-0.0604775	0.106926	0.05055	0.0028175	-0.191832	-0.0323025	-0.0201375	-0.177093	0.0192637	0.00523	0.220427	0.228648	-0.0281	-0.130349	0.111644	-0.0307225	0.0124938	-0.13146	0.0368075	0.084745	0.60527	0.06634	0.33258	0.0762
YAR002W	NUP60	FG-nucleoporin component of central core of the nuclear pore complex; contributes directly to nucleocytoplasmic transport and maintenance of the nuclear pore complex (NPC) permeability barrier and is involved in gene tethering at the nuclear periphery; relocalizes to the cytosol in response to hypoxia; both NUP1 and NUP60 are homologous to human NUP153	0.0568862	0.0713075	-0.0763025	0.0160425	0.0069475	0.00422125	0.0228162	-0.0755663	-0.01229	-0.0029225	0.0460075	-0.121681	0.00737125	0.0243375	-0.00473375	0.0211362	0.0155225	-0.022785	0.0478175	0.0451225	-0.0461275	-0.04046	-0.111049	-0.0862513	-0.11166	0.138406	-0.138366	0.0361662
YAR003W	SWD1	Subunit of the COMPASS (Set1C) complex; COMPASS methylates histone H3 on lysine 4 and is required in transcriptional silencing near telomeres; WD40 beta propeller superfamily member with similarity to mammalian Rbbp7	0.062175	0.0451925	0.249012	0.0467225	0.24311	0.173278	0.0986875	0.597084	0.0213913	-0.0320812	0.0123775	0.218867	0.206753	0.284169	0.153524	0.0319513	0.157759	0.06441	0.377335	0.33705	-0.00934625	0.0238325	0.03966	0.694862	0.034225	-0.344697	0.01648	0.202703
YAR007C	RFA1	Subunit of heterotrimeric Replication Protein A (RPA); RPA is a highly conserved single-stranded DNA binding protein involved in DNA replication, repair, and recombination; RPA protects against inappropriate telomere recombination, and upon telomere uncapping, prevents cell proliferation by a checkpoint-independent pathway; role in DNA catenation/decatenation pathway of chromosome disentangling; …	-0.222647	-0.06486	0.0980725	0.02691	0.008215		0.0263875	-0.0285437	0.330958	0.0483525	-0.046125		0.118424	-0.09183	-0.0131425	-0.0448975	0.534065		0.456839	-0.084395	0.04241		0.374557	0.414768	0.2169	0.843639	0.116483	0.194606
YAR008W	SEN34	Subunit of the tRNA splicing endonuclease; tRNA splicing endonuclease (Sen complex) is composed of Sen2p, Sen15p, Sen34p, and Sen54p; Sen complex also cleaves the CBP1 mRNA at the mitochondrial surface; Sen34p contains the active site for tRNA 3' splice site cleavage and has similarity to Sen2p and to Archaeal tRNA splicing endonuclease	-0.002985	0.0142275	0.037345	0.043255	-0.0002325	-0.0049375	-0.0409262	0.07318	0.055325	0.04367	-0.0399538	-0.00421375	0.0217062	-0.077285	0.025945	0.0427675	-0.0895363	-0.0362963	0.081085	0.232011	0.0449425	-0.025605	-0.0275075
YAR014C	BUD14	Protein involved in bud-site selection; Bud14p-Glc7p complex is a cortical regulator of dynein; forms a complex with Kel1p and Kel2p that regulates Bnr1p (formin) to affect actin cable assembly, cytokinesis, and polarized growth; diploid mutants display a random budding pattern instead of the wild-type bipolar pattern; relative distribution to the nucleus increases upon DNA replication stress	-0.0343225		0.0495625	-0.0920912		-0.0209325	0.0059175	-0.102444	0.070055	0.0487225	0.13003	0.020795	-0.047595	-0.0707088			-0.0606713	0.0229675	0.0181225	-0.022835	0.02303	-0.03122	0.03576	-0.161624	-0.11713	-0.00785375	-0.0821362	-0.104369
YAR015W	ADE1	N-succinyl-5-aminoimidazole-4-carboxamide ribotide synthetase; required for 'de novo' purine nucleotide biosynthesis; red pigment accumulates in mutant cells deprived of adenine; protein abundance increases in response to DNA replication stress	-0.176898	0.224774	-0.05132	-0.0627475	-0.0710013	-0.0062275	-0.11942	-0.107076	0.0159975	-0.0864075	0.0200588	0.0243625	0.035405	-0.0398775	0.0626275	-0.0023475	-0.0357775	-0.0002125	0.0124025	-0.004315	-0.048805	0.03267	0.0195612	0.087485	-0.00661	-0.161447	0.03021	0.0659975
YAR018C	KIN3	Nonessential serine/threonine protein kinase; possible role in DNA damage response; influences tolerance to high levels of ethanol	-0.00209625	0.251734	-0.0251612	-0.0028625	-0.0788713	-0.0455162	-0.111415	-0.053755	-0.007585	0.001425	0.0010375	0.140699	-0.015375	0.0482013	-0.130789	0.0703913	-0.0205025	-0.0012325	0.00403625	0.0316975	-0.0355925	0.00178625	-0.00136
YAR019C	CDC15	Protein kinase of the Mitotic Exit Network; localized to the spindle pole bodies at late anaphase; promotes mitotic exit by directly switching on the kinase activity of Dbf2p; required for spindle disassembly after meiosis II; relocalizes to the cytoplasm upon DNA replication stress	0.210444	0.0702937	-0.025105	0.031515	0.0755762	0.0057825	-0.14277	0.062135	-0.0108988	0.0303087	-0.0136387	1.03581	0.124824	0.376202	0.324431	0.211689	-0.185064	0.015425	0.755921	0.369802	0.151195	0.182956	0.0468275	2.24867	0.628886	1.54373	-0.164846	-0.173999
YAR020C	PAU7	Member of the seripauperin multigene family; active during alcoholic fermentation, regulated by anaerobiosis, inhibited by oxygen, repressed by heme	-0.28619	0.374385	-0.270839	0.0116925		0.1504	-0.078805	0.118399	0.302337	0.117651	-0.362314	-0.394433	-0.0862238	-0.0244788	-0.105265	0.07276	-0.0164613	-0.0306825	0.0929337	-0.253103	-0.0606587	-0.03715	-0.38916
YAR023C		Putative integral membrane protein; member of DUP240 gene family	0.0176038	-0.24836	-0.0607188	-0.02909	0.0572375	-0.0860412	0.13485	0.076795	0.221555	0.177155	-0.01916	-0.03096	0.0113463	-0.225015	0.00171	-0.03598	-0.0476525	-0.0311113	-0.00088375	-0.0565525	0.0972662	0.03982	-0.0170925
YAR027W	UIP3	Putative integral membrane protein of unknown function; interacts with Ulp1p at the nuclear periphery; member of DUP240 gene family	0.00119	-0.254899	0.0024	-0.0190188	0.0325475	-0.01498	0.043645	-0.0670525	0.0984025	-0.0413125	0.00254	-0.00484	-0.0041125	0.011545	-0.0089425	-0.00684375	-0.04858	0.0203	-0.125335	0.0378788	0.00153	-0.0076175	0.0045125	-0.40931	1.33536	-0.00208	0.24761	0.092875
YAR028W		Putative integral membrane protein; member of DUP240 gene family; GFP-fusion protein is induced in response to the DNA-damaging agent MMS	-0.139285	-0.01277	0.019625	0.0377212	0.100127	-0.0006925	-0.204984	-0.01524	0.0315975	0.150559	-0.00637375	-0.0311913	0.013665	-0.0184875	0.0343	0.063965	-0.0580975	-0.0394388	-0.0345225	-0.0581638	-0.04143	-0.0600125	0.03635	-0.117667	0.443814	0.295066	0.170209	-0.064895
YAR029W		Member of DUP240 gene family but contains no transmembrane domains; green fluorescent protein (GFP)-fusion protein localizes to the cytoplasm in a punctate pattern	-0.031525	-0.108625	0.141932	-0.0080325	-0.0172025	-0.0219125	0.01748	0.449525	0.09533	0.222236	0.111848	0.0932875	0.0759925	0.460355	-0.0054775	-0.014815	-0.0191125	0.0175525	0.116242	-0.061305	0.0315088	0.037755	0.01908
YAR030C		Dubious open reading frame; unlikely to encode a functional protein, based on available experimental and comparative sequence data; partially overlaps the uncharacterized ORF YAR029W and the verified gene PRM9	-0.0827775	-0.0536462	0.27445	0.073215	0.0597262	0.005525	0.0226263	0.481488	-0.002855	0.0922675	0.0526288	0.05728	-0.047385	0.0612338	-0.0062725	0.0131975	0.010095	-0.0154175	-0.000305	0.0166313	0.041105	0.0215425	-0.0137875
YAR031W	PRM9	Pheromone-regulated protein; contains 3 predicted transmembrane segments and an FF sequence, a motif involved in COPII binding; member of DUP240 gene family; PRM9 has a paralog, PRM8, that arose from a segmental duplication	-0.0007	-0.247935	0.0275563	0.06027	0.138412	0.0969238	-0.158686	-0.0859962	-0.0812587	0.136153	0.00446875	-0.0478625	-0.0190762	-0.0205113	-0.0001975	0.0289725	-0.0044575	-0.0103462	-0.182459	0.0763038	-0.135958	0.018995	0.0392088
YAR033W	MST28	Putative integral membrane protein, involved in vesicle formation; forms complex with Mst27p; member of DUP240 gene family; binds COPI and COPII vesicles; MST28 has a paralog, MST27, that arose from a segmental duplication	-0.0132038	-0.0991688	0.0242225	-0.0303588	0.138597	0.0357875	-0.14442	-0.08617	-0.10687	0.0605238	0.00548125	-0.06607	-0.0410625	-0.0958313	-0.0446825	-0.0100375	-0.0741825	-0.0309087	-0.00860125	-0.00580875	-0.0291287	0.0719463	0.015035
YAR035W	YAT1	Outer mitochondrial carnitine acetyltransferase; minor ethanol-inducible enzyme involved in transport of activated acyl groups from the cytoplasm into the mitochondrial matrix; phosphorylated	0.00751375	-0.00065	0.0318225	-0.016255	-0.0478825	-0.0179925	-0.00789375	0.0711988	-0.0508625	-0.0411412	-0.00242875	0.0233125	0.0102162	-0.0358438	0.0285688	0.0115163	0.103318	0.121989	0.0165775	-0.0199338	0.00874375	0.007505	-0.03468
YAR042W	SWH1	Protein similar to mammalian oxysterol-binding protein; contains ankyrin repeats and FFAT motif; interacts with ER anchor Scs2p at the nucleus-vacuole junction; regulated by sterol binding; SWH1 has a paralog, OSH2, that arose from the whole genome duplication	0.0642725	0.0264475	-0.00099	-0.06971	-0.0408625	-0.0257375	-0.0691988	-0.0273125	-0.0289737	0.0225662	-0.0539138	-0.04285	0.0209225	-0.00641125	-0.0085875	0.066815	-0.0819162	-0.0447	0.00758	0.0072325	0.0810525	-0.106745	-0.08583
YAR042W	SWH1	Protein similar to mammalian oxysterol-binding protein; contains ankyrin repeats and FFAT motif; interacts with ER anchor Scs2p at the nucleus-vacuole junction; regulated by sterol binding; SWH1 has a paralog, OSH2, that arose from the whole genome duplication	0.0642725	0.0264475	-0.00099	-0.06971	-0.0408625	-0.0257375	-0.0691988	-0.0273125	-0.0289737	0.0225662	-0.0539138	-0.04285	0.0209225	-0.00641125	-0.0085875	0.066815	-0.0819162	-0.0447	0.00758	0.0072325	0.0810525	-0.106745	-0.08583
YAR047C		Dubious open reading frame; unlikely to encode a functional protein, based on available experimental and comparative sequence data	0.020335	0.0690575	0.815604	0.05351	-0.0308025	-0.0154475	0.09754	0.460531	0.0371312	0.035885	-0.0217975	-0.080975	0.04263	0.0274675	-0.0030375	-0.0402025	-0.0537188	-0.0236225	0.188925	0.0106137	0.0462563	0.0723625	0.014995
YAR050W	FLO1	Lectin-like protein involved in flocculation; cell wall protein that binds mannose chains on the surface of other cells, confers floc-forming ability that is chymotrypsin sensitive and heat resistant; important for co-flocculation with other yeasts, mediating interaction with specific species; FLO1 has a paralog, FLO5, that arose from a segmental duplication	0.03271	0.0455388	-0.0254875	-0.00958375	0.0410375	0.0172913	-0.0288225	0.0294975	0.034415	-0.0434838	0.0010675	-0.0329875	-0.0173288	0.0259037	0.00993625	-0.006555	0.06443	-0.0232737	0.00937	0.0240388	-0.0107225	0.01263	-0.0980138
YAR053W		Dubious open reading frame; unlikely to encode a functional protein, based on available experimental and comparative sequence data	0.0757425	-0.00068	-0.002885	0.025445	0.132945	-0.0685025	-0.0191775	0.02823	-0.0199725	0.161721	0.063755	0.0175925	-0.0230725	0.0349825	0.00485	0.020645	0.056125	0.0632225	0.152213	-0.103095	0.141421	-0.01489	-0.0528275
YAR060C		Dubious open reading frame; unlikely to encode a functional protein, based on available experimental and comparative sequence data; YAR060C has a paralog, YHR212C, that arose from a segmental duplication	-0.030725	-0.0150025	0.018925	0.0641237	-0.0588938	-0.0476	0.147127	0.00732625	-0.0119125	0.0870625	-0.150066	0.018	-0.0211087	0.0913425	-0.019775	0.024505	-0.169978	0.08545	-0.164784	-0.0963275	-0.100865	0.0047225	0.107387
YAR064W		Pseudogenic fragment with similarity to flocculins; YAR064W has a paralog, YHR213W-B, that arose from a segmental duplication	0.0617938	-0.0735875	-0.063975	-0.01138	0.13475	0.0088975	0.0110675	0.0286775	0.07422	0.0992525	0.16956	0.0124925	-0.0020875	0.0496525	0.01829	0.026565	-0.030905	0.05447	0.0242625	-0.006775	0.0024275	-0.0842413	-0.025615
YAR066W		Putative GPI protein; SWAT-GFP and mCherry fusion proteins localize to the endoplasmic reticulum and vacuole respectively; YAR066W has a paralog, YHR214W, that arose from a segmental duplication	0.0806075	0.0177825	0.0493837	0.0431275	-0.05041	0.0266125	-0.038605	-0.149643	0.11029	0.128746	-0.0723788	0.05741	-0.0193663	-0.00668	0.0026525	0.0082575	-0.06329	-0.034135	0.0420575	0.023595	0.05309	-0.0346525	-0.020445
YAR068W		Fungal-specific protein of unknown function; induced in respiratory-deficient cells; YAR068W has a paralog, YHR214W-A, that arose from a segmental duplication	-0.0284888	-0.122885	-0.0650063	-0.0055625	-0.0208275	-0.0553763	0.0053075	0.018825	0.13184	-0.173605	0.0290225	0.0304875	0.0238812	-0.0359325	0.0440275	-0.0260875	-0.0699	0.0196137	-0.304944	-0.036675	0.0783388	-0.028115	-0.0095975
YAR069C		Dubious open reading frame; unlikely to encode a protein, based on available experimental and comparative sequence data; YAR069C has a paralog, YHR214C-D, that arose from a segmental duplication	0.0905962	0.239365	0.0136063	0.0356	0.04502	0.0421788	-0.0915275	0.184853	0.222653	0.150663	0.0424725	0.122953	0.0241437	0.112742	-0.027625	0.0622175	0.110342	0.0166763	-0.0121738	-0.01981	0.0204538	-0.051945	-0.001615
YAR070C		Dubious open reading frame; unlikely to encode a protein, based on available experimental and comparative sequence data; YAR070C has a paralog, YHR214C-B, that arose from a segmental duplication	-0.0387375	0.21441	-0.092035	-0.0494875	0.187982	-0.0532313	-0.128789	0.0314913	0.118855	0.0405937	-0.0084275	-0.0353675	0.0802337	0.00162125	0.0352075	0.0439525	0.034865	-0.131455	0.0388162	-0.0078925	0.122846	-0.0563025	-0.0603525
YAR071W	PHO11	One of three repressible acid phosphatases; glycoprotein that is transported to the cell surface by the secretory pathway; induced by phosphate starvation and coordinately regulated by PHO4 and PHO2; PHO11 has a paralog, PHO12, that arose from a segmental duplication	-0.120527	-0.50432	-0.483109	0.05086	0.446175	0.018575	-0.0809175	0.15435	0.0489588	0.106518	0.198624	-0.124147	-0.159718	0.312708	-0.04658	0.0127025	-0.283575	-0.067775	-0.47064	-0.08154	-0.124105	0.032055	-0.0426	-0.0090725	-0.126447	-0.105634	-0.0291563	-0.0725925
YAR073W	IMD1	Nonfunctional protein with homology to IMP dehydrogenase; blocked reading frame, located close to the telomere; not expressed at detectable levels; YAR073W and YAR075W comprise a continuous reading frame in most strains of S. cerevisiae; YAR073W/YAR075W together have a paralog, IMD2, that arose from a segmental duplication	0.09622	0.19257	-0.0138487	0.0038575	-0.0076625	0.0319337	-0.39862	0.0139938	-0.0975888	0.055785	0.0336938	0.0389575	0.142602	-0.0690613	-0.0436375	-0.0502	-0.03557	0.088985	0.0835913	0.0274437	-0.09449	-0.0181075	0.0338225
YAR075W		Non-functional protein with homology IMP dehydrogenase; YAR073W/IMD1 and YAR075W comprise a continuous reading frame in most strains of S. cerevisiae; YAR073W/YAR075W together have a paralog, IMD2, that arose from a segmental duplication	0.008465	0.21416	0.0330563	0.06576	0.03401	0.00872625	-0.0245513	-0.0031325	-0.0322063	-0.0262712	0.00268875	-0.0649225	-0.00153375	0.0780762	-0.027165	-0.036485	-0.02333	0.0166288	-0.0660825	0.0163725	0.032595	-0.112356	-0.03302
YBL001C	ECM15	Non-essential protein of unknown function; likely exists as tetramer, may be regulated by the binding of small-molecule ligands (possibly sulfate ions), may have a role in yeast cell-wall biogenesis	-0.0417225	-0.012165	-0.05033	-0.0178363	-0.0133087	-0.0677825	0.002815	0.0732862	0.137283	0.0575575	-0.0134888	0.037385	-0.113154	0.006065	0.0203075	-0.0509425	-0.0100375	-0.0360575	-0.0855087	0.0063925	0.1472	0.0462025	0.0616725	-0.0015275	0.24606	-0.0308075	-0.07898	0.215408
YBL002W	HTB2	Histone H2B; core histone protein required for chromatin assembly and chromosome function; nearly identical to HTB1; Rad6p-Bre1p-Lge1p mediated ubiquitination regulates reassembly after DNA replication, transcriptional activation, meiotic DSB formation and H3 methylation	0.197417	-0.0292013	0.129675	-0.0707275	0.0277975	-0.0339325	-0.213145	-0.005095	0.0946913	0.068335	-0.0749275	-0.02992	1.84492	0.153647	-0.03279	0.00469875	-0.058465	-0.0360225	-0.10918	0	0.0627825	-0.0294225	-0.10184	0.0165712	-0.0309638	0.13104	0.0425575	-0.153473
YBL003C	HTA2	Histone H2A; core histone protein required for chromatin assembly and chromosome function; one of two nearly identical (see also HTA1) subtypes; DNA damage-dependent phosphorylation by Mec1p facilitates DNA repair; acetylated by Nat4p	-0.0244975	-0.229919	-0.0380725	-0.0254375	-0.0593025	-0.092685	-0.139102	-0.235569	0.044655	-0.06833	0.0254463	0.06391	1.62274	-0.099395	-0.02997	0.062085	-0.075235	0.011775	-0.0483125	0.02891	0.0002	0.0245375	0.020635	-0.107025	-0.0749575	-0.0430625	0.002755	-0.17315
YBL005W	PDR3	Transcriptional activator of the pleiotropic drug resistance network; regulates expression of ATP-binding cassette (ABC) transporters through binding to cis-acting PDRE sites (PDR responsive elements); has a role in response to drugs and organic solvents; post-translationally up-regulated in cells lacking functional mitochondrial genome; involved in diauxic shift; relative distribution to nucleus…	0.02926	-0.14235	-0.0286425	0.0231725	0.05013	-0.0368137	-0.134097	-0.0616925	-0.01448	-0.121329	0.0672638	-0.172602	0.0412387	-0.0858275	0.446304	0.269936	-0.221416	-0.0426687	0.175066	0.0656313	0.306673	-0.0831588	-0.0902925	0.193004	-0.205484	-0.279543	-0.127925	-0.197344
YBL006C	LDB7	Component of the RSC chromatin remodeling complex; interacts with Rsc3p, Rsc30p, Npl6p, and Htl1p to form a module important for a broad range of RSC functions	-0.0415075	0.0861925	0.01775	-0.033155	0.0257038	-0.0325112	-0.05109	-0.0762937	0.00920875	-0.0255112	-0.0171688	-0.0176313	-0.050205	-0.0397875	-0.0192725	0.00491125	-0.0716875	-0.0240825	-0.026595	-0.0704238	-0.0677263	0.0987362	0.00309
YBL007C	SLA1	Cytoskeletal protein binding protein; required for assembly of the cortical actin cytoskeleton; interacts with proteins regulating actin dynamics and proteins required for endocytosis; found in the nucleus and cell cortex; has 3 SH3 domains	-0.0091025	0.117184	0.0261325	-0.0204362	-0.051195	0.0143888	0.0244825	0.076765	0.0970825	0.136994	0.010805	0.0704925	0.137934	0.0282487	0.0630563	0.0180025	0.18411	-0.0110813	0.214312	0.445849	0.0295425	0.010465	-0.0372938	-0.03541	0.384207	0.00782875	0.280385	0.149901
YBL008W	HIR1	Subunit of the HIR complex; HIR is a nucleosome assembly complex involved in regulation of histone gene transcription; contributes to nucleosome formation, heterochromatic gene silencing, and formation of functional kinetochores	0.022635	-0.04815	-0.148334	-0.127807	0.0075575	0.108399	-0.0483813	-0.0318937	-0.110805	-0.209372	0.064595	-0.0162788	-0.157274	0.0327588	-0.451265	-0.121559	-0.080455	0.131422	-0.08271	0.0785488	-0.0151337	0.04775	-0.002395	-0.042755	-0.172237	0.23112	-0.0547975	-0.164477
YBL009W	ALK2	Protein kinase; along with its paralog, ALK1, required for proper spindle positioning and nuclear segregation following mitotic arrest, proper organization of cell polarity factors in mitosis, proper localization of formins and polarity factors, and survival in cells that activate spindle assembly checkpoint; phosphorylated in response to DNA damage; ALK2 has a paralog, ALK1, that arose from the …	0.16128		0.0366675	0.274813		0.0662463	-0.0136037	0.021135	-0.053545	-0.065335	0.263951	0.0536862	0.0508113	-0.0755475	0.139345	0.5581	0.0054875	0.0356112	0.0373275	0.05226	-0.00196625	0.0011425	0.0202825
YBL010C		Putative protein of unknown function; green fluorescent protein (GFP)-fusion protein colocalizes with clathrin-coated vesicles	0.07675	-0.062105	0.0405525	-0.034005	0.14471	0.0007	-0.0558587	0.075025	-0.0903275	0.00425375	-0.0919775	-0.0596025	-0.0220012	0.02451	-0.000605	-0.00623125	0.0362937	-0.0313563	-0.032775	0.0012625	0.0173575	0.00823125	-0.0154713	-0.206985	-0.106075	0.0374525	-0.0108375	-0.09271
YBL011W	SCT1	Glycerol 3-phosphate/dihydroxyacetone phosphate sn-1 acyltransferase; dual substrate-specific acyltransferase of the glycerolipid biosynthesis pathway; prefers 16-carbon fatty acids; similar to Gpt2p; gene is constitutively transcribed	0.0285537	-0.0227925	-0.02171	0.018025	0.0238975	-0.0392425	-0.0769887	0.0342162	-0.066105	-0.106726	0.0392837	-0.120663	-0.0172612	-0.00349875	-0.0188938	-0.00226125	-0.030945	0.0137412	0.0115575	-0.0512737	-0.0398512	-0.01693	0.019065	0.100374	0.325028	0.00339875	0.752025	0.0399725
YBL012C		Dubious open reading frame; unlikely to encode a functional protein, based on available experimental and comparative sequence data	0.08314	-0.0004225	-0.00706	0.02565	0.0466325	-0.0386375	-0.0372275	-0.111882	-0.0340312	-0.10724	0.00345375	0.051005	-0.08071	-0.01146	-0.0278425	-0.0352475	0.0242475	-0.00463	-0.0672525	0.013055	0.0249875	-0.0757575	-0.04769
YBL013W	FMT1	Methionyl-tRNA formyltransferase; catalyzes the formylation of initiator Met-tRNA in mitochondria; potential Cdc28p substrate	-0.21636	0.197882	0.151792	-0.0948112	-0.0092675	0.0082625	-0.100882	-0.0117075	-0.0015925	0.064045	0.01301	-0.0399012	-0.0317337	0.00825875	-0.189082	-0.0893762	0.0191375	-0.01414	-0.0423362	0.0447038	-0.0641812	-0.121588	-0.00399375	0.13911	-0.0277025	-0.127592	-0.0822675	-0.0387925
YBL014C	RRN6	Component of the core factor (CF) rDNA transcription factor complex; CF is required for transcription of 35S rRNA genes by RNA polymerase I and is composed of Rrn6p, Rrn7p, and Rrn11p	0.0989987	0.349339	0.276655	0.169978	1.41328	0.35987	0.16073	0.0340275	0.0660988	0.163144	-0.0380038	0.33944	0.508904	0.707448	-0.0386987	0.106544	-0.00323125	0.105605	1.25481	0.671577	-0.067065	0.0521763	0.438233	1.46445	0.00651	0.51279	-0.0244462	0.223479
YBL015W	ACH1	Protein with CoA transferase activity; particularly for CoASH transfer from succinyl-CoA to acetate; has minor acetyl-CoA-hydrolase activity; phosphorylated; required for acetate utilization and for diploid pseudohyphal growth	0.128787	-0.0926175	-0.0171213	-0.0350775	0.125675	-0.0317113	-0.0378612	-0.0756525	-0.0950375	-0.004735	0.0479038	-0.0006825	-0.008335	-0.0294125	0.09986	0.049305	-0.10814	-0.019955	-0.0222925	-0.009435	-0.00493	-0.024105	-0.019925	-0.16193	-0.126332	-0.0854475	-0.034285	-0.0457938
YBL016W	FUS3	Mitogen-activated serine/threonine protein kinase involved in mating; phosphoactivated by Ste7p; substrates include Ste12p, Far1p, Bni1p, Sst2p; inhibits invasive growth during mating by phosphorylating Tec1p, promoting its; inhibits recruitment of Ste5p, Cdc42p-mediated asymmetry and mating morphogenesis	0.0118775	-0.0198513	0.0340062	0.00487	0.0599112	0.0084275	-0.1606	-0.0391763	-0.0435425	-0.00618375	0.00551375	-0.0136487	-0.384565	-0.0124425	0.0881512	0.0574475	-0.167094	0.0139575	-0.0761638	-0.026895	0.00195125	0.0444838	0.00656125	0.11083	0.0256888	-0.0703025	-0.0106938	-0.05916
YBL017C	PEP1	Type I transmembrane sorting receptor for multiple vacuolar hydrolases; cycles between the late-Golgi and prevacuolar endosome-like compartments	0.212045	0.0326725	-0.0451475	0.0742075	0.147694	0.00899875	-0.0365837	0.0691538	-0.156924	0.158175	0.0037775	-0.0891387	0.0108112	0.0780663	-0.012695	0.0877962	0.0218375	-0.0535837	0.16773	0.343203	0.119581	0.174857	0.0992038	-0.00190125	0.121722	0.01661	0.318434	-0.0785663
YBL018C	POP8	Subunit of both RNase MRP and nuclear RNase P; RNase MRP cleaves pre-rRNA, while nuclear RNase P cleaves tRNA precursors to generate mature 5' ends and facilitates turnover of nuclear RNAs; relocalizes to the cytosol in response to hypoxia	-0.143194	0.0680425	0.0521025	0.115352	-0.205821	0.0350087	-0.057395	-0.05317	0.0402425	0.06751	-0.04705	0.0191925	0.01239	-0.0296588	-0.0610938	-0.047475	-0.0247263	-0.0205488	0.145717	-0.0606063	-0.0483613	-0.0046425	0.082125	0.522547	-0.128915	-0.0943875	0.163312	0.0162
YBL019W	APN2	Class II abasic (AP) endonuclease involved in repair of DNA damage; homolog of human HAP1 and E. coli exoIII	0.0571463	0.013095	0.0822937	-0.0391525	-0.0293563	-0.0350113	-0.0500125	-0.0199075	0.14365	-0.160555	0.0417113	0.044885	0.0392175	-0.152429	0.0172425	-0.0357213	-0.06859	0.0736813	0.0365175	0.00596	0.00376875	-0.0744925	-0.06088	-0.485705	0.019905	0.142176	0.0395175	-0.0371612
YBL021C	HAP3	Subunit of the Hap2p/3p/4p/5p CCAAT-binding complex; complex is heme-activated and glucose-repressed; complex is a transcriptional activator and global regulator of respiratory gene expression; contains sequences contributing to both complex assembly and DNA binding	-0.0158875	-0.04944	0.0441175	-0.0684325	0.107633	0.0268537	0.150495	-0.03101	0.158594	0.00493	-0.01456	0.17373	-0.0347988	-0.0300025	-0.0597362	-0.137242	-0.020265	0.0329675	0.117219	-0.002305	0.01837	-0.141554	-0.05828	1.18513	0.191146	0.70794	0.218482	0.0321025
YBL022C	PIM1	ATP-dependent Lon protease; involved in degradation of misfolded proteins in mitochondria; required for biogenesis and maintenance of mitochondria	0.190342	-0.139403	0.0463525	-0.04767	-0.0482238	-0.0176187	-0.0138687	-0.0607287	-0.0957537	0.0495775	0.061815	-0.0604162	0.103661	-0.0624963	0.0030425	0.0436387	-0.01561	-0.0518337	-0.0116675	0.00548	0.0921613	-0.019035	-0.0169963	-0.031215	-0.108621	-0.0140125	-0.0124113	0.0799388
YBL023C	MCM2	Protein involved in DNA replication; component of the Mcm2-7 hexameric helicase complex that binds chromatin as a part of the pre-replicative complex; relative distribution to the nucleus increases upon DNA replication stress	-0.127676	0.872157	0.533238	0.0446812	2.02108	1.32246	0.0688638	0.456039	0.071605	0.213028	-0.02328	1.30337	0.472091	1.58906	0.0325212	0.0133887	0.0368588	0.0844225	1.28438	1.04584	-0.0658263	0.607733	0.26097	1.01209	0.0499556	0.255909	0.0720856	0.442632
YBL024W	NCL1	S-adenosyl-L-methionine-dependent tRNA: m5C-methyltransferase; methylates cytosine to m5C at several positions in tRNAs and intron-containing pre-tRNAs; increases proportion of tRNALeu(CAA) with m5C at wobble position in response to hydrogen peroxide, causing selective translation of mRNA from genes enriched in TTG codon; loss of NCL1 confers hypersensitivity to oxidative stress; similar to Nop2p…	0.0078625	-0.25207	-0.0657062	0.0187837	0.160231	0.000185	0.319864	-0.22947	0.0377025	-0.027895	0.0079725	0.00685	-0.01026	0.04269	0.0367525	0.048085	-0.0680575	0.042735	0.04157	-0.048365	0.0085075	0.0011325	-0.02044	-0.064475	0.0624175	0.0522637	-0.0248375	0.0155062
YBL025W	RRN10	Protein involved in promoting high level transcription of rDNA; subunit of UAF (upstream activation factor) for RNA polymerase I	0.104542	-0.156413	-0.106041	-0.117767	0.012115	0.0086325	0.0958462	-0.136008	-0.0358788	0.00304	-0.0054825	-0.00580625	-0.12754	-0.05646	0.0638675	-0.0437175	-0.15966	0.0567713	-0.20399	0.025395	-0.0889	0.0687975	-0.021445	0.610914	-0.0033875	0.81388	-0.119466	-0.0132938
YBL026W	LSM2	Lsm (Like Sm) protein; part of heteroheptameric complexes (Lsm2p-7p and either Lsm1p or 8p): cytoplasmic Lsm1p complex involved in mRNA decay; nuclear Lsm8p complex part of U6 snRNP and possibly involved in processing tRNA, snoRNA, and rRNA; relocalizes from nucleus to cytoplasmic foci upon DNA replication stress	-0.0101025	0.48405	0.903095	0.222167		-0.00266625	0.107052	0.721194	-0.0700987	1.02282	-0.223624	0.294431	0.936503	1.07918	0.145388	0.142684	1.15296	0.140937	0.79885	0.895371	0.0708737	0.167011	0.300875	0.694914	0.122118	0.36668	-0.223081	-0.177594
YBL028C		Protein of unknown function that may interact with ribosomes; green fluorescent protein (GFP)-fusion protein localizes to the nucleolus; predicted to be involved in ribosome biogenesis	0.0152038	0.015955	0.0007025	-0.00392625	-0.0532	0.02815	0.157317	0.0597688	0.00907625	-0.00359625	-0.0826125	0.0302	-0.0212175	-0.0262012	0.0529613	-0.0497725	-0.04171	0.0409325	0.0832	-0.0225575	0.00084375	-0.0086625	-0.0117313	0.120565	0.0988725	0.0350087	0.206431	0.224715
YBL029C-A		Protein of unknown function; green fluorescent protein (GFP)-fusion protein localizes to the cell periphery; protein abundance increases in response to DNA replication stress; has potential orthologs in Saccharomyces species and in Yarrowia lipolytica	-0.159408	0.0126975	-0.046095	0.0592775	0.054615	-0.00757	-0.162214	-0.390241	-0.03062	-0.106031	0.0457	-0.1553	0.0101738	-0.0499438	-0.0151025	-0.00221	-0.16048	-0.167843	0.0155912	-0.0038825	0.0004825	-0.0205125	0.0904425	-0.19502	-0.192175	-0.0657575	-0.147473	-0.0207975
YBL029W		Non-essential protein of unknown function	-0.0426588	0.149218	-0.0161713	0.00706	0.123975	0.0146775	0.159539	0.024145	-0.0127913	0.02426	-0.0195925	-0.0477213	-0.0447025	-0.05096	0.0829025	0.0113175	-0.0319113	0.0104262	-0.0168625	-0.01082	0.0180212	0.002105	-0.0689525	-0.121485	-0.13246	0.0512037	0.0317588	0.0391
YBL030C	PET9	Major ADP/ATP carrier of the mitochondrial inner membrane; exchanges cytosolic ADP for mitochondrially synthesized ATP; also imports heme and ATP; required for viability in many lab strains that carry a sal1 mutation; PET9 has a paralog, AAC3, that arose from the whole genome duplication; human homolog SLC25A4 implicated in progressive external ophthalmoplegia can complement yeast null mutant	0.157775		-0.0541775	0.0492088		-0.03124	0.09217	-0.0997275	-0.0908425	0.0459925	-0.107857	-0.024725	-0.0664975	0.06161	-0.0289175	-0.0898537	-0.06118	0.12347	-0.234955	-0.121731	-0.07001	-0.0673725	-0.0403575
YBL031W	SHE1	Mitotic spindle protein; interacts with components of the Dam1 (DASH) complex, its effector Sli15p, and microtubule-associated protein Bim1p; also localizes to nuclear microtubules and to the bud neck in a ring-shaped structure; inhibits dynein function	0.122525	-0.09858	0.0571337	0.0080425	0.203742	-0.024325	0.0384825	-0.0437838	-0.0130137	0.0797863	0.0374725	-0.02968	-0.007625	-0.05593	0.0355675	-0.030175	-0.049605	0.0521125	0.0447375	0.0776375	0.07196	-0.031575	0.010215	0.0799425	-0.203148	0.0745975	0.0117825	-0.052225
YBL032W	HEK2	RNA binding protein involved in asymmetric localization of ASH1 mRNA; represses translation of ASH1 mRNA, an effect reversed by Yck1p-dependent phosphoryation; regulates telomere position effect and length; similarity to hnRNP-K	-0.0315438		-0.194327	-0.176624		0.0362675	0.109687	0.0510162	0.222335	-0.080195	-0.0619888	0.169555	-0.068565	0.0266275			-0.093005	0.209975	0.200247	0.176723	-0.0262362	-0.113981	-0.00256	0.0157525	-0.07	0.171639	0.338984	0.136079
YBL033C	RIB1	GTP cyclohydrolase II; catalyzes the first step of the riboflavin biosynthesis pathway	-0.0077325	0.417673	-0.0063175	0.102824	-0.195132	-0.02394	-0.048205	0.128139	-0.0933075	-0.0124025	0.05019	0.0860487	0.0485225	-0.118411	-0.0461687	0.054295	-0.213397	0.143265	0.170439	0.0425312	-0.204107	-0.012295	0.014595	-0.106765	0.22891	0.111415	-0.008375	-0.0447275
YBL034C	STU1	Component of the mitotic spindle; binds to interpolar microtubules via its association with beta-tubulin (Tub2p); required for interpolar microtubules to provide an outward force on the spindle poles	0.068795	-0.095385	-0.00654	0.0335775	1.16196	0.448195	0.040165	0.330269	0.0735375	1.10996	-0.01318	-0.0359737	-0.0496775	0.0512875	0.02331	-0.0167962	-0.0371125	-0.00070375	0.05376	0.68598	0.0009675	0.087885	0.11606	0.729835	-0.0655213	-0.218024	0.079325	-0.241321
YBL035C	POL12	B subunit of DNA polymerase alpha-primase complex; required for initiation of DNA replication during mitotic and premeiotic DNA synthesis; also functions in telomere capping and length regulation	-0.0189787	-0.174178	0.0332625	4.875e-05	0.697772	0.134231	-0.0137775	0.101458	0.07526	-0.0805037	-0.113485	-0.0313138	-0.080645	0.0402725	-0.283316	-0.106416	-0.117499	0.0635462	0.124463	0.274511	0.0372038	0.0141463	0.0536538	0.202747	-0.0815663	0.02695	-0.0158675	0.07132
YBL036C		Putative non-specific single-domain racemase; based on structural similarity; binds pyridoxal 5'-phosphate; expression of GFP-fusion protein induced in response to the DNA-damaging agent MMS	-0.12266	0.065705	-0.03832	0.025245	0.0330275	-0.0264425	-0.0514	-0.0299425	0.0417625	-0.043045	-0.0402825	-0.0375325	0.00412125	-0.0050375	-0.0085575	-0.0834213	0.0387025	0.0245625	-0.0693475	-0.00991	-0.001965	0.0020325	0.010425	-0.0493375	0.238629	-0.04222	-0.138118	0.126746
YBL037W	APL3	Alpha-adaptin; large subunit of the clathrin associated protein complex (AP-2); involved in vesicle mediated transport	-0.0401313	0.0538875	-0.0588	0.02058	0.211897	-0.03182	-0.211191	0.256242	-0.0387325	0.112054	0.0219713	0.101657	0.09791	-0.043155	-0.0483275	0.0497187	-0.030095	0.00637375	0.0993587	0.121081	-0.0237963	-0.0013325	0.197426	0.0317137	-0.0511187	-0.128057	0.0033375	-0.0349662
YBL038W	MRPL16	Mitochondrial ribosomal protein of the large subunit; homologous to bacterial L16 ribosomal protein; synthetic lethality with hac1 mutation suggests a possible role in synthesis of precursors for protein glycosylation	0.203733	-0.135645	0.0157438	0.08391	0.03093	0.132098	-0.043205	0.0846713	-0.0719725	-0.00861625	-0.0599025	-0.0171225	0.0900475	-0.0911375	-0.0258625	0.000125	-0.007785	-0.0390325	-0.0484363	-0.021215	-0.143975	-0.03269	-0.09497	0.398458	0.0939513	-0.0455612	0.31254	0.26857
YBL039C	URA7	Major CTP synthase isozyme (see also URA8); catalyzes the ATP-dependent transfer of the amide nitrogen from glutamine to UTP, forming CTP, the final step in de novo biosynthesis of pyrimidines; involved in phospholipid biosynthesis; capable of forming cytoplasmic filaments termed cytoophidium, especially during conditions of glucose depletion; URA7 has a paralog, URA8, that arose from the whole g…	-0.036315	0.0156788	0.0342063	0.12776	-0.0411675	0.009515	0.019525	-0.0996387	-0.00721375	0.69884	0.02153	-0.0127212	-0.00669375	-0.00065	0.00437	0.0878775	-0.04753	0.0484887	-0.0178038	0.0702912	-0.035685	0.0231325	0.014835	-0.0316138	0.439207	-0.16087	0.086905	0.04557
YBL040C	ERD2	HDEL receptor; an integral membrane protein that binds to the HDEL motif in proteins destined for retention in the endoplasmic reticulum; has a role in maintenance of normal levels of ER-resident proteins	-0.199481	0.497356	0.418764	0.332116	0.13076	0.0249413	-0.05227	0.461555	0.321175	0.326497	0.0518013	0.956638	1.59638	0.45634	0.814201	0.207076	1.83788	0.129054	0.888813	0.827725	-0.101697	0.393146	0.442447	0.83016	1.30244	0.0026	0.63057	0.379655
YBL042C	FUI1	High affinity uridine permease, localizes to the plasma membrane; also mediates low but significant transport of the cytotoxic nucleoside analog 5-fluorouridine; not involved in uracil transport; relative distribution to the vacuole increases upon DNA replication stress	-0.0623075	0.116913	0.01208	-0.0361125	-0.04602	-0.01592	0.0319713	-0.198159	0.0356825	0.0534637	-0.0222675	0.095265	-0.0568825	0.0157475	0.0195675	-0.0332225	-0.0893675	0.031215	-0.210866	-0.0484525	-0.0804725	-0.061485	0.127268	0.0126725	0.52557	0.209991	-0.0517813	-0.110125
YBL044W		Putative protein of unknown function; YBL044W is not an essential protein	-0.0790562	-0.579192	-0.275498	0.0955025	-0.831785	0.10869	0.119444	-0.313719	0.122261	-0.12244	-0.04289	0.47511	0.150744	-0.253399	0.102131	0.027495	-0.219825	0.15717	-0.455968	0.104191	-0.16795	-0.0294475	-0.0894525
YBL045C	COR1	Core subunit of the ubiquinol-cytochrome c reductase complex; the ubiquinol-cytochrome c reductase complex (bc1 complex) is a component of the mitochondrial inner membrane electron transport chain	-0.00392	-0.107872	0.0441613	0.122474	-0.13795	-0.0353275	0.127002	-0.066835	0.206145	0.0047725	0.0432838	0.0075825	-0.0601475	-0.0057375	-0.0107425	-0.017975	0.0333375	0.1307	-0.188195	-0.0233825	-0.159722	-0.031755	-0.0832125	0.197447	-0.18298	0.168703	-0.230486	0.134971
YBL046W	PSY4	Regulatory subunit of protein phosphatase PP4; presence of Psy4p in the PP4 complex (along with catalytic subunit Pph3p and Psy2p) is required for dephosphorylation of the histone variant H2AX, but not for dephosphorylation of Rad53p, during recovery from the DNA damage checkpoint; localization is cell-cycle dependent and regulated by Cdc28p phosphorylation; required for cisplatin resistance; hom…	-0.0121063	0.084265	-0.0151	-0.0368875	-0.0819863	-0.0911612	0.0770987	0.0247025	-0.06404	-0.109	-0.00493	-0.0366275	-0.041605	0.046925	0.02371	-0.03468	0.0371988	-0.0284138	0.0154687	-0.0770587	0.0373662	-0.051165	0.04382	2.02725	0.0237275	0.156823	-0.047675	-0.02275
YBL047C	EDE1	Scaffold protein involved in the formation of early endocytic sites; putative regulator of cytokinesis; homo-oligomerization is required for localization to and organization of endocytic sites; has a network of interactions with other endocytic proteins; binds membranes in a ubiquitin-dependent manner; may also bind ubiquitinated membrane-associated proteins; interacts with Cmk2 and functions ups…	-0.041615	0.230314	-0.0004	-0.0494913	-0.0556225	-0.0200313	0.0548	-0.063155	-0.0167175	-0.0252937	-0.06996	0.188477	0.105356	0.00034625	0.124209	0.0110375	0.025155	-0.0396038	0.013395	0.0728763	-0.0119825	-0.062205	0.0660162	0.0188787	0.120014	0.166519	0.370733	0.0318112
YBL048W	RRT1	Protein of unknown function; identified in a screen for mutants with increased levels of rDNA transcription; dubious open reading frame unlikely to encode a protein, based on experimental and comparative sequence data	0.01744	0.474332	-0.049385	0.098275	-0.0807575	0.035435	0.151956	0.051875	-0.007155	0.076095	-0.0245425	-0.01635	0.02592	0.005135	-0.0196625	-0.003395	-0.0512112	-0.005035	0.0975125	-0.013045	0.0147275	0.040805	-0.05195
YBL049W	MOH1	Protein of unknown function, essential for stationary phase survival; not required for growth on nonfermentable carbon sources; possibly linked with vacuolar transport	0.056175	-0.165632	0.158195	0.0092625	-0.0355825	0.0186163	0.0387788	-0.122456	-0.0218563	-0.0680237	-0.0541437	0.0913387	-0.0566375	-0.034505	0.0560775	-0.0504837	-0.069925	0.0737913	-0.207306	0.00507	0.058035	0.0517525	0.0168587
YBL050W	SEC17	Alpha-SNAP cochaperone; SNARE-complex adaptor for Sec18 (NSF) during the disassembly of postfusion cis-SNARE complexes; stimulates the ATPase activity of Sec18p; peripheral membrane protein required for vesicular transport between ER and Golgi, the 'priming' step in homotypic vacuole fusion, and autophagy; similar to mammalian alpha-SNAP	0.141759	-0.0385088	-0.039705	-0.00649125	0.0317825	0.004275	0.120305	-0.0632825	0.27895	-0.0548063	0.0299787	0.182037	0.0498	0.0791112	0.13465	-0.0181975	0.14587	0.247126	-0.261961	-0.0777588	0.0403037	0.0610663	-0.093475
YBL051C	PIN4	Protein involved in G2/M phase progression and response to DNA damage; interacts with Rad53p; contains an RNA recognition motif, a nuclear localization signal, and several SQ/TQ cluster domains; hyperphosphorylated in response to DNA damage	-0.00699375	-0.198136	-0.021915	0.00905	0.068975	0.0441913	-0.004165	0.04795	-0.0255225	-0.02163	-0.0145287	-0.0831	-0.0013325	-0.0298612	0.139932	0.07978	-0.0334363	-0.0341262	0.011085	-0.0018225	-0.09587	-0.028735	-0.0676488	-0.294505	0.01505	0.002135	-0.138045	0.079295
YBL052C	SAS3	Histone acetyltransferase catalytic subunit of NuA3 complex; acetylates histone H3, involved in transcriptional silencing; homolog of the mammalian MOZ proto-oncogene; mutant has aneuploidy tolerance; sas3gcn5 double mutation is lethal	0.06174	0.0620938	-0.0190025	0.0990888	-0.06079	0.0272	-0.0157037	0.040975	0.0492425	-0.00303625	0.0125675	0.117879	0.0652762	0.0374688	-0.10727	-0.107582	0.0508687	0.0501325	-0.122682	0.0131437	0.0128713	0.056485	-0.02261	-0.0132025	-0.0675575	-0.139886	0.05027	0.00288625
YBL053W		Dubious open reading frame; unlikely to encode a functional protein, based on available experimental and comparative sequence data	0.0168525	-0.386559	-0.166642	-0.0015525	-0.182695	-0.01538	-0.0363475	0.239594	-0.01477	-0.0656075	0.0320737	0.0526525	0.106895	0.00573	0.0204725	0	-0.009895	-0.052225	0.0376325	0.00941	4e-05	-0.0719525	-0.01857
YBL054W	TOD6	PAC motif binding protein involved in rRNA and ribosome biogenesis; subunit of the RPD3L histone deacetylase complex; Myb-like HTH transcription factor; hypophosphorylated by rapamycin treatment in a Sch9p-dependent manner; activated in stochastic pulses of nuclear localization	0.025195	0.04448	0.00844625	-0.0241725	-0.0066475	0.0191963	-0.0501388	0.0038825	-0.0877025	-0.016105	0.0144788	-0.0057475	0.01856	-0.0462125	0.0076775	-0.0246675	0.013065	-0.0176675	0.00884	-0.008895	0.023755	-0.0337775	-0.01121	0.0749575	-0.0106525	-0.0159675	-0.121185	-0.133813
YBL055C		3'-->5' exonuclease and endonuclease with a possible role in apoptosis; has similarity to mammalian and C. elegans apoptotic nucleases	-0.189391	0.272948	0.273118	0.134687	-0.0969538	0.0296262	-0.155266	0.00523375	0.0496363	-0.144291	-0.0260775	0.08219	-0.0775738	0.0459538	0.0036175	0.10103	-0.202376	-0.23621	-0.107039	-0.0727075	0.057265	-0.0813475	0.04819	1.25844	0.893096	-0.272064	0.183544	0.415764
YBL056W	PTC3	Type 2C protein phosphatase (PP2C); dephosphorylates Hog1p (see also Ptc2p) to limit maximal kinase activity induced by osmotic stress; dephosphorylates T169 phosphorylated Cdc28p (see also Ptc2p); role in DNA damage checkpoint inactivation; PTC3 has a paralog, PTC2, that arose from the whole genome duplication	-0.0155575	0.427053	-0.036445	0.150783	0.0634912	0.130535	0.07892	-0.0404825	0.120319	-0.238274	0.0196563	-0.0167337	-0.0763475	-0.122725	0.25995	0.1845	0.0144137	-0.0134325	-0.108103	-0.181215	-0.0177775	-0.0418	0.06225	-0.023895	0.103566	-0.0406913	-0.0733475	0.253044
YBL057C	PTH2	One of two mitochondrially-localized peptidyl-tRNA hydrolases; negatively regulates the ubiquitin-proteasome pathway via interactions with ubiquitin-like ubiquitin-associated proteins; dispensable for cell growth; see also PTH1	-0.0048675	-0.0123737	0.0325063	-0.00860375	0.03012	-0.031475	0.0321	0.109659	0.0127175	-0.0379175	0.0005575	0.0578375	0.0212475	0.0627025	0.00109875	-0.00599125	0.017365	-0.0090975	0.07451	0.0219225	0.06035	0.017705	0.0821325	-0.16917	-0.0923075	0.0007425	-0.254695	-0.345903
YBL058W	SHP1	UBX domain-containing substrate adaptor for Cdc48p; ubiquitin regulatory X domain-containing protein that acts as a substrate recruiting cofactor for Cdc48p; positively regulates Glc7p PPase activity to promote growth and mitotic progression in complex with Cdc48p; ubiquitinated protein interactor involved in ER-associated degradation (ERAD); regulated by nuclear Ub-dependent degradation (INMAD p…	-0.167339	0.329296	-0.0309175	-0.00811375	0.0465575	-0.0177075	0.349092	0.132217	-0.0022375	-0.0218825	-0.030875	0.0935813	0.293073	0.180156	0.05446	0.044065	0.147636	0.0485963	0.146402	0.062555	-0.0164238	0.06622	0.03811	-0.11256	0.100547	0.0233737	-0.04942	-0.201116
YBL059C-A	CMC2	Protein involved in respiratory chain complex assembly or maintenance; protein of the mitochondrial intermembrane space; contains twin Cx9C motifs that can form coiled coil-helix-coiled-coil helix fold	-0.0122525	0.780685	0.172684	0.208655		-0.0735325	0.0165038	-0.088795	0.209214	0.105163	-0.103733	-0.354499	-0.221807	0.12095	-0.126328	-0.02348	0.04209	0.0256012	-0.207425	-0.047325	-0.12778	-0.233318	-0.068155	-0.385425
YBL059W		Putative protein of unknown function; the authentic, non-tagged protein is detected in highly purified mitochondria in high-throughput studies; YBL059W has a paralog, YER093C-A, that arose from the whole genome duplication	-0.075805	-0.12793	0.0260312	0.0102925	-0.0115875	-0.01268	-0.0942438	-0.0332125	-0.093345	0.0920138	-0.049975	-0.0571225	-0.12451	0.0241775	-0.0881788	-0.06296	0.156025	-0.0239825	-0.2739	-0.0687075	-0.0576375	-0.0314425	-0.0354725	0.328168	-0.0511863	-0.0639487	0.07946	0.131834
YBL060W	YEL1	Guanine nucleotide exchange factor specific for Arf3p; localized to the bud neck and tip; required for localization of Arf3p to the bud neck and tip	0.0319975	0.288743	0.01061	-0.0193588	-0.0013575	0.0142737	-0.0753625	-0.03628	-0.0953337	0.05868	0.0104838	0.0376812	0.0627425	0.0008475	0.02748	0.07234	0.0235375	-0.0065125	0.0406212	-0.00636125	-0.0746162	-0.00168625	-0.02203	-0.13421	-0.173113	-0.119705	0.0602175	0.01451
YBL061C	SKT5	Activator of Chs3p (chitin synthase III) during vegetative growth; recruits Chs3p to the bud neck via interaction with Bni4p; SKT5 has a paralog, SHC1, that arose from the whole genome duplication	-0.0688213	0.0823462	-0.0364625	-0.09333	0.142648	-0.02494	-0.0829125	0.0980013	0.045335	-0.117483	-0.0176588	0.02629	-0.0501075	0.0092775	-0.0137687	0.0369288	0.0461325	0.0678837	-0.133716	-0.0442875	-0.0205887	-0.048	-0.0455962	-0.0512288	-0.0758125	-0.044425	-0.0691425	-0.190664
YBL062W		Dubious open reading frame; unlikely to encode a functional protein, based on available experimental and comparative sequence data	-0.0259975	0.0471537	-0.0501525	-0.001585	-0.155085	0.0184625	0.0264	0.0478575	-0.0285637	0.0158025	0.0272525	-0.0924675	-0.198175	0.0442625	-0.00268	0.108364	0.002165	-0.0962975	-0.29505	0.009155	0.0321175	0.0868775	-0.04788
YBL063W	KIP1	Kinesin-related motor protein; required for mitotic spindle assembly, chromosome segregation, and 2 micron plasmid partitioning; functionally redundant with Cin8p for chromosomal but not plasmid functions	0.0500362	0.0253875	0.0626162	-0.0783375	-0.0364875	-0.0281563	-0.11452	-0.111119	0.0245213	0.431126	-0.0096125	-0.065405	-0.00979375	-0.122441	-0.0228688	-0.0267112	-0.0966575	-0.0727412	-0.0390313	-0.0950325	-0.0222688	-0.053155	-0.0683213	-0.151339	-0.0627125	-0.0463537	-0.126466	0.0537813
YBL064C	PRX1	Mitochondrial peroxiredoxin with thioredoxin peroxidase activity; has a role in reduction of hydroperoxides; reactivation requires Trr2p and glutathione; induced during respiratory growth and oxidative stress; phosphorylated; protein abundance increases in response to DNA replication stress	0.205715	-0.07459	-0.05975	-0.0195275	0.01927	-0.07251	-0.007385	-0.0424825	-0.0170875	0.0573075	0.13018	0.0065525	0.0211288	-0.0147975	0.0244525	-0.00846875	-0.115115	-0.004845	0.045745	-0.0530025	0.095135	-0.022945	0.01022	0.199054	-0.0485475	-0.0143675	-0.023605	0.101038
YBL065W		Dubious open reading frame; unlikely to encode a functional protein, based on available experimental and comparative sequence data; partially overlaps verified ORF SEF1/YBL066C; YBL065W is a non-essential gene	0.0257775	0.0284338	0.299187	-0.016475	0.0299738	0.024525	0.0266037	0.920442	0.0071975	0.015895	0.00712875	0.006785	0.116615	-0.00594625	0.00246	0.024355	0.003515	0.0924475	0.0067625	0.00796625	-0.00738	0.0009975	0.024895
YBL067C	UBP13	Ubiquitin-specific protease that cleaves Ub-protein fusions; UBP13 has a paralog, UBP9, that arose from the whole genome duplication	0.058545	-0.19824	0.291955	-0.00943875	0.0455325	0.0400338	-0.22049	-0.0460675	-0.0898112	0.116975	0.0341813	-0.00160875	0.0780425	-0.015985	0.03672	0.0568	0.0635075	-0.0091475	0.116671	0.0891288	0.00623125	0.0309563	-0.00382	-0.244631	-0.0466012	-0.0695988	-0.0026275	0.00912625
YBL068W	PRS4	5-phospho-ribosyl-1(alpha)-pyrophosphate synthetase, synthesizes PRPP; which is required for nucleotide, histidine, and tryptophan biosynthesis; one of five related enzymes, which are active as heteromultimeric complexes; PRS4 has a paralog, PRS2, that arose from the whole genome duplication; a missense mutation in the conserved residue R196 of its human homolog PRPS1 is pathogenic	0.02047	-0.02422	-0.01937	0.060745	-0.008875	0.0240625	0.0120662	-0.523289	-0.0159462	0.012025	-0.0063125	0.027035	0.02933	0.01097	0.0351038	0.0339762	0.058315	-0.00595	0.03871	0.009975	-0.02028	0.0156925	-0.08678	0.215794	0.32761	0.214911	0.041095	-0.055385
YBL069W	AST1	Lipid raft associated protein; interacts with the plasma membrane ATPase Pma1p and has a role in its targeting to the plasma membrane by influencing its incorporation into lipid rafts; sometimes classified in the medium-chain dehydrogenase/reductases (MDRs) superfamily; AST1 has a paralog, AST2, that arose from the whole genome duplication	0.019705	0.02735	0.0614362	-0.0280475	-0.0406238	-0.0584	-0.0942975	-0.0606925	-0.055815	0.123732	0.0216525	-0.053015	0.0640975	-0.0232375	-0.040845	-0.000255	-0.0359175	-0.0186375	0.033625	0.0302775	0.04086	-0.0430975	-0.007015	0.40841	-0.590181	0.0175525	0.0137375	-0.08757
YBL070C		Dubious open reading frame; unlikely to encode a functional protein, based on available experimental and comparative sequence data	-0.0326	-0.936394	0.0175012	-0.314954		-0.0016175	0.122799	0.0227863	-0.01878	-0.063735	-0.03333	0.00542875	0.0480575	0.0154275			0.02835	-0.028005	0.090805	-0.00935	0.050805	0.125805	0.0278625
YBL071C		Putative protein of unknown function; conserved among S. cerevisiae strains; YBL071C is not an essential gene	-0.043245	-0.03827	0.0874875	-0.0460513	-0.0547725	0.0951575	0.0519363	-0.00642625	0.094205	0.00291	0.0161288	0.07222	0.048525	-0.02164	0.00032625	-0.00439375	0.276147	0.02869	-0.0819975	0.064925	0.0015525	-0.0124563	0.00940625
YBL071W-A	KTI11	Zn-ribbon protein that co-purifies with Dph1 and Dph2; in a complex required for synthesis of diphthamide on translation factor eEF2 and with Elongator subunits Iki3p, Elp2p, and Elp3p; involved in modification of wobble nucleosides in tRNAs; forms a stable heterodimer with Ats1p	-0.0960763	-0.0369725	-0.0067325	0.00791	0.02138	-0.0266088	0.0020775	0.0711462	0.0152713	-0.06753	0.0682087	0.0213487	-0.0210112	-0.0669562	0.0126587	0.02808	-0.0204263	-0.0490475	-0.0073175	-0.0009825	-0.0291213	-0.0531713	0.0364387	-0.0108825	0.00509	-0.0485487	-0.192989	-0.103792
YBL072C	RPS8A	Protein component of the small (40S) ribosomal subunit; homologous to mammalian ribosomal protein S8, no bacterial homolog; RPS8A has a paralog, RPS8B, that arose from the whole genome duplication	0.0596	-0.141961	0.00614	0.0537912	0.08521	-0.0347425	-0.0650825	-0.074515	0.09488	-0.0654825	-0.0121513	0.0834025	0.0368487	0.0305475	0.0983575	0.0258775	-0.0287425	0.145624	-0.221617	-0.0130075	-0.0186625	0.0659425	-0.05069	-0.01369	0.417733	-0.0378825	-0.00486625	0.221806
YBL073W		Dubious open reading frame; unlikely to encode a functional protein, based on available experimental and comparative sequence data; partially overlaps the essential gene AAR2/YBL074C	-0.0512675	0.678474	0.087305	0.07071	0.10973	-0.0122887	0.0314825	-0.0739863	0.0464725	-0.0652213	-0.180059	0.029885	-0.06376	0.0763913	-0.0386637	-0.11647	-0.072805	0.048665	0.0720138	-0.00135	-0.03316	-0.0555025	0.00801
YBL074C	AAR2	Component of the U5 snRNP complex; required for splicing of U3 precursors; originally described as a splicing factor specifically required for splicing pre-mRNA of the MATa1 cistron	-0.0478062	0.04117	0.0514913	-0.0946963	0.0632825	-0.01818	-0.0632075	0.149049	-0.130461	0.135396	0.0030175	-0.0550225	0.0294762	0.0145013	0.0799875	0.0445113	0.0602538	0.010535	-0.00293625	0.0315488	0.002565	0.05375	0.017065	0.106825	-0.06146	-0.0100475	-0.048165	-0.02257
YBL075C	SSA3	ATPase involved in protein folding and the response to stress; plays a role in SRP-dependent cotranslational protein-membrane targeting and translocation; member of the heat shock protein 70 (HSP70) family; localized to the cytoplasm; SSA3 has a paralog, SSA4, that arose from the whole genome duplication	0.002665		0.0446725	-0.139826		-0.009135	-0.366516	0.106883	0.099095	-0.0507462	-0.0184412	0.0065	-0.125734					0.08448						-0.0961575	-0.0635225	-0.252075	-0.04538	-0.05667
YBL076C	ILS1	Cytoplasmic isoleucine-tRNA synthetase; target of the G1-specific inhibitor reveromycin A	-0.0433062	0.194564	-0.0275075	-0.0720275	0.0144875	-0.0679763	-0.01272	0.028625	-0.0353625	-0.0502537	-0.0247225	0.003885	0.00909375	-0.0450325	-0.117765	-0.056255	-0.0384175	0.0452938	-0.041965	-0.0710888	-0.050745	-0.00269875	0.0640012	-0.152595	0.143401	0.00455875	-0.0795775	0.0054975
YBL078C	ATG8	Component of autophagosomes and Cvt vesicles; regulator of Atg1p, targets it to autophagosomes; binds the Atg1p-Atg13p complex, triggering its vacuolar degradation; unique ubiquitin-like protein whose conjugation target is lipid phosphatidylethanolamine (PE); Atg8p-PE is anchored to membranes, is involved in phagophore expansion, and may mediate membrane fusion during autophagosome formation; dec…	-0.077285	0.0356837	-0.0063375	-0.0678062	-0.0348313	0.0083925	-0.010115	-0.125334	-0.18946	-0.0494325	-0.171305	0.0167487	-0.0404912	0.0194738	-0.0389163	-0.0409525	0.00359	0.02096	-0.152949	0.0073525	-0.206161	0.066525	0.0105488
YBL079W	NUP170	Subunit of inner ring of nuclear pore complex (NPC); contributes to NPC assembly and nucleocytoplasmic transport; interacts with genomic regions that contain ribosomal protein and subtelomeric genes, where it functions in nucleosome positioning and as a repressor of transcription; both Nup170p and NUP157p are similar to human Nup155p; NUP170 has a paralog, NUP157, that arose from the whole genome…	-0.001865	0.0895113	-0.06446	0.182019	0.089245	-0.031275	0.0115075	-0.231305	0.00518	0.236185	0.0189475	0.033975	-0.005075	0.0142112	0.0513925	0.05925	0.00578375	-0.06845	0.01905	0.032365	0.0215775	0.0634388	0.053745	0.100144	0.0936875	-0.0753825	-0.247606	-0.0178538
YBL080C	PET112	Subunit of the trimeric GatFAB AmidoTransferase(AdT) complex; involved in the formation of Q-tRNAQ; mutation is functionally complemented by the bacterial GatB ortholog	-0.0415	-0.11302	-0.171706	0.0363163	0.144992	0.01852	0.29261	0.0290387	0.05754	-0.0849025	-0.0053425	0.0452638	-0.188771	0.170434	-0.0228612	-0.0129725	-0.0464075	0.007405	-0.410356	-0.0114925	-0.0270113	0.033295	0.1645	-0.048475	-0.0850163	-0.0929938	-0.0048375	0.114775
YBL081W		Non-essential protein of unknown function; null mutation results in a decrease in plasma membrane electron transport	-0.00765	-0.0385062	-0.0532025	0.0507488	0.139119	-0.0555	-0.0639587	-0.0295425	0.0017625	-0.0714225	0.0553387	0.0578075	0.0387625	-0.06021	-0.0246775	0.0256525	0.0174137	0.0243775	0.0549025	-0.0482425	0.0104325	0.063655	-0.03465
YBL082C	ALG3	Dolichol-P-Man dependent alpha(1-3) mannosyltransferase; involved in synthesis of dolichol-linked oligosaccharide donor for N-linked glycosylation of proteins; G353A missense mutation in human ortholog ALG3 implicated in carbohydrate deficient glycoprotein syndrome type IV, which is characterized by microcephaly, severe epilepsy, minimal psychomotor development, partial deficiency of sialic acids…	-0.0106338	-0.0141738	0.229552	0.00153875	0.0175975	-0.047305	-0.0212137	0.0192037	0.0242	0.0532287	-0.0711775	0.0750725	0.0266387	-0.0584125	0.10298	-0.0751825	-0.0358513	-0.0113738	0.0089475	-0.0758575	0.0158562	-0.0394912	-0.0407475	0.250895	0.07871	0.155085	0.30372	-0.0722125
YBL083C		Dubious open reading frame; unlikely to encode a functional protein, based on available experimental and comparative sequence data; overlaps verified ORF ALG3	0.0610225	-0.0433275	-0.0867975	-0.0992975	-0.02752	-0.0026875	-0.184065	-0.276757	0.0841337	0.0673725	-0.0286388	-0.200343	-0.192543	0.05827	-0.032065	0.086265	0.0570975	0.0009	-0.258333	-0.0122787	-0.009135	0.094245	0.0686438
YBL084C	CDC27	Subunit of the Anaphase-Promoting Complex/Cyclosome (APC/C); APC/C is a ubiquitin-protein ligase required for degradation of anaphase inhibitors, including mitotic cyclins, during the metaphase/anaphase transition	-0.0899275	0.151991	0.0565462	-0.0567287	0.23345	0.280857	0.32703	0.228856	-0.198524	-0.30685	0.040475	1.91556	0.195379	1.01009	-0.269637	-0.137074	-0.00317875	0.627755	1.1435	0.480729	-0.0632812	0.375096	0.62026	0.719893	-0.140618	1.0251	-0.367777	0.12524
YBL085W	BOI1	Protein implicated in polar growth; functionally redundant with Boi2p; interacts with bud-emergence protein Bem1p; contains an SH3 (src homology 3) domain and a PH (pleckstrin homology) domain; relocalizes from bud neck to cytoplasm upon DNA replication stress; BOI1 has a paralog, BOI2, that arose from the whole genome duplication	-0.10658	-0.0482387	-0.0208513	0.0331912	0.0180562	-0.0316512	0.175052	-0.00398625	0.0338237	-0.0618187	0.0331975	-0.0865825	-0.130721	0.0102387	-0.205759	-0.0471375	0.0448287	0.0297512	-0.0936287	0.0563463	0.003635	0.0129375	-0.0612075	-0.010695	-0.0580362	-0.0764262	0.284056	-0.09883
YBL086C		Protein of unknown function; green fluorescent protein (GFP)-fusion protein localizes to the cell periphery	0.0942738	0.03586	0.113918	-0.0386425	-0.00034	0.0373462	0.163637	0.142934	0.0801412	0.035745	0.0100237	0.0838125	0.0891363	-0.14071	0.03803	0.10362	-0.115535	0.02328	0.043515	-0.059825	0.08585	-0.062845	-0.0321	0.0090725	0.0644275	0.00574375	0.146624	-0.04177
YBL087C	RPL23A	Ribosomal 60S subunit protein L23A; homologous to mammalian ribosomal protein L23 and bacterial L14; RPL23A has a paralog, RPL23B, that arose from the whole genome duplication	0.0697175	-0.427755	-0.00217	0.0575225	0.0645575	-0.101483	-0.081995	0.0722187	0.0541813	-0.171483	0.0260513	-0.0255425	-0.00289	0.14919	-0.44069	-0.105335	0.367777	-0.0483925	0.0813575	-0.0078175	0.0205238	0.112157	0.240283	1.17887	0.196635	0.117447	0.546432	0.279108
YBL088C	TEL1	Protein kinase primarily involved in telomere length regulation; contributes to cell cycle checkpoint control in response to DNA damage; acts with Red1p and Mec1p to promote interhomolog recombination by phosphorylation of Hop1; functionally redundant with Mec1p; regulates P-body formation induced by replication stress; homolog of human ataxia-telangiectasia mutated (ATM) gene	0.114278	0.0300513	0.006065	0.00496375	-0.0315225	0.0348813	-0.0342275	0.0710425	0.040175	0.0311937	0.0066775	-0.0509975	-0.0726762	-0.0984437	0.196941	-0.0007275	-0.028815	-0.0104187	-0.0257575	-0.0260063	-0.0101675	0.0265825	-0.0342887
YBL089W	AVT5	Putative transporter; member of a family of seven S. cerevisiae genes (AVT1-7) related to vesicular GABA-glycine transporters; AVT5 has a paralog, AVT6, that arose from the whole genome duplication	-0.088675	-0.24145	0.00884625	0.044285	0.0296325	0.049645	-0.0265225	-0.0306625	-0.0538775	-0.0141925	-0.04525	-0.06518	0.022115	-0.0255525	-0.004525	0.0001225	0.102657	0.0484975	-0.278285	0.0421075	-0.10136	-0.0362	-0.03516
YBL090W	MRP21	Mitochondrial ribosomal protein of the small subunit; MRP21 exhibits genetic interactions with mutations in the COX2 and COX3 mRNA 5'-untranslated leader sequences	0.00011875	-0.066675	0.0127075	-0.060695	-0.149001	-0.0941638	0.0388675	-0.184505	-0.09015	0.031145	0.0593	-0.00124	0.05728	-0.00896875	0.0126538	0.025115	-0.0409988	-0.0874313	0.00022	0.0230512	-0.00146125	0.01179	-0.01404	-0.14539	0.0417225	-0.0540725	-0.0135662	0.0909963
YBL091C	MAP2	Methionine aminopeptidase; catalyzes the cotranslational removal of N-terminal methionine from nascent polypeptides; function is partially redundant with that of Map1p	-0.035435	0.066555	0.0712275	0.0241875	-0.0245	-0.0116537	0.11334	0.07717	0.0131863	0.06835	0.0203912	-0.113058	-0.0565375	-0.00014375	-0.052095	-0.0052425	0.09262	-0.01904	-0.0926987	-0.0164837	0.0384175	-0.0559525	-0.0262175	-0.0379275	-0.00543625	-0.046355	0.0468312	0.236003
YBL091C-A	SCS22	Protein involved in regulation of phospholipid metabolism; one of 6 proteins (Ist2p, Scs2p, Scs22p, Tcb1p, Tcb2p, Tcb3p) that connect the ER and plasma membrane (PM); regulates PM PI4P levels by controlling access of the Sac1p phosphatase to its substrate, PI4P; human VAP homolog; similar to D. melanogaster inturned protein; SWAT-GFP and mCherry fusion proteins localize to the cytosol; SCS22 has …	-0.106667	-0.143356	0.266147	0.0214	-0.0188187	-0.0271325	0.0474225	0.0682113	-0.0311675	-0.080785	0.00795875	0.0920575	-0.0299587	0.05201	0.001415	-0.0037025	0.0130987	-0.0481775	0.01335	-0.04527	0.04434	0.033925	-0.0708737
YBL093C	ROX3	Subunit of the RNA polymerase II mediator complex; associates with core polymerase subunits to form the RNA polymerase II holoenzyme	0.0019125	-0.119728	1.05909	0.0673863	0.023415	0.0923675	-0.0469162	0.626528	-0.266236	-0.140481	0.108991	0.117275	0.113695	-0.0028175	0.0120488	-0.0434425	0.0273625	-0.0132325	0.0974025	-0.0099425	-0.22523	-0.0155075	-0.104368	1.46683	0.102725	0.695788	0.642116	0.439447
YBL094C		Dubious open reading frame; unlikely to encode a functional protein, based on available experimental and comparative sequence data; partially overlaps uncharacterized ORF YBL095W	0.0127575	-0.192286	-0.019405	0.0120725	-0.123905	-0.00416125	-0.07651	0.0251087	0.009565	0.00860625	0.0567238	0.06547	0.028105	-0.0841163	0.0102737	0.0317325	0.109607	-0.0144825	-0.0801387	0.01196	0.0602125	0.057655	0.03142
YBL095W	MRX3	Protein that associates with mitochondrial ribosome; likely functions in cristae junction formation; the authentic, non-tagged protein is detected in highly purified mitochondria in high-throughput studies	-0.149695	0.0782375	-0.035485	0.000435	0.0987925	0.0332825	-0.05464	0.00659	-0.0428075	-0.01619	-0.018965	0.0012675	-0.0540812	0.0094275	-0.0397375	-0.0745688	-0.02988	0.00528	-0.0218325	0.0382275	-0.0249875	0.012525	-0.10203	-0.18421	-0.0337237	-0.0679725	-0.0647	-0.115248
YBL096C		Non-essential protein of unknown function	-0.0915075	-0.0490075	-0.00799125	0.0019125	0.0299325	0.0667075	0.0666	0.246674	0.102106	-0.11346	0.0563525	0.026575	0.101665	0.0484975	0.0153125	0.000795	0.0775587	0.0091225	0.128488	-0.00015125	0.0265588	0.0280575	-0.0060125
YBL097W	BRN1	Subunit of the condensin complex; required for chromosome condensation and for clustering of tRNA genes at the nucleolus; may influence multiple aspects of chromosome transmission	0.015065	-0.236136	-0.0698213	-0.0793912	1.17496	0.02586	-0.166417	0.442713	-0.0386825	-0.0138338	-0.012655	-0.0931725	-0.01747	0.137275	-0.0723075	-0.0185575	-0.0056675	-0.0588475	1.26436	0.96841	0.00737625	-0.140615	-0.0693525	0.0897062	-0.022295	-0.00575625	0.719849	-0.00816625
YBL098W	BNA4	Kynurenine 3-monooxygenase; required for the de novo biosynthesis of NAD from tryptophan via kynurenine; expression regulated by Hst1p; putative therapeutic target for Huntington disease	0.0542	-0.0346325	0.09833	0.042555	-0.0909025	0.0022625	-0.228288	-0.0668662	0.024225	0.0574725	0.0063075	-0.0428175	0.04242	0.12397	0.021375	0.00843625	0.106633	-0.044035	0.11981	-0.085155	0.0179025	-0.02686	-0.0307525	-0.404718	-0.108686	-0.0564437	0.0532837	0.0125437
YBL099W	ATP1	Alpha subunit of the F1 sector of mitochondrial F1F0 ATP synthase; which is a large, evolutionarily conserved enzyme complex required for ATP synthesis; F1 translationally regulates ATP6 and ATP8 expression to achieve a balanced output of ATP synthase genes encoded in nucleus and mitochondria; phosphorylated; N-terminally propionylated in vivo	0.16405	0.135396	0.0536325	0.125369	-0.278265	0.07674	0.0085425	0.0161075	-0.114145	0.181253	-0.0052725	0.00105	0.250258	-0.052355	-0.0107125	-0.04586	0.0332125	0.0555425	-0.0100263	0.0046675	0.140234	-0.130316	0.163332	1.18	-0.0632188	-0.0509062	0.030065	0.0550025
YBL100C		Dubious open reading frame; unlikely to encode a functional protein, based on available experimental and comparative sequence data; almost completely overlaps the 5' end of ATP1	0.531632	0.05895	0.41151	0.0317562	0.74354	-0.050495	0.217826	0.252529	-0.21313	0.16031	0.0567462	0.03196	0.0712675	-0.39792	-0.0410413	-0.0197063	-0.13395	-0.0688425	0.13494	-0.074675	-0.307273	0.468906	0.00315125
YBL101C	ECM21	Protein involved in regulating endocytosis of plasma membrane proteins; identified as a substrate for ubiquitination by Rsp5p and deubiquitination by Ubp2p; promoter contains several Gcn4p binding elements; ECM21 has a paralog, CSR2, that arose from the whole genome duplication	0.0267637	-0.050215	-0.04366	-0.0130188	0.0817875	-0.0133688	0.0558538	-0.246182	-0.0426138	-0.0567975	0.0207838	-0.0640037	0.0558787	0.06259	0.0204625	0.008315	0.0555063	0.02956	-0.0730463	-0.09622	-0.0280388	-0.0120375	0.0212237	-0.0150825	-0.0102887	0.0665175	0.0453025	-0.0061025
YBL102W	SFT2	Tetra-spanning membrane protein found mostly in the late Golgi; non-essential; can suppress some sed5 alleles; may be part of the transport machinery, but precise function is unknown; similar to mammalian syntaxin 5	0.0133837	0.119755	0.027745	-0.0032725	0.0078025	-0.0063125	-0.0995	-0.0369175	0.02984	-0.0371812	0.0081175	-0.0724738	-0.0253587	-0.0484062	0.0428975	0.0125975	-0.01507	-0.024725	0.02491	-0.0160475	-0.095095	-0.0051325	-0.0955125	-0.058165	-0.0335875	-0.0170675	0.303655	-0.0729475
YBL103C	RTG3	bHLH/Zip transcription factor for retrograde (RTG) and TOR pathways; forms a complex with another bHLH/Zip protein, Rtg1p, to activate the pathways; target of Hog1p	0.0249125	-0.135197	0.0451875	-0.01267	-0.0555325	0.0176325	0.003195	0.0444762	-0.019125	-0.0391975	0.03732	-0.0979675	-0.0415075	-0.07105	0.01896	0.00931	0.043025	-0.05287	0.113382	-0.0486113	0.0429275	-0.0692625	-0.020625	0.222615	0.00713	0.27497	0.0756887	0.101236
YBL104C	SEA4	Subunit of SEACAT, a subcomplex of the SEA complex; Sea4p, along with Rtc1p and Mtc5p, redundantly inhibit the TORC1 inhibitory role of the Iml1p/SEACIT (Iml1p-Npr2p-Npr3p) subcomplex, a GAP for GTPase Gtr1p (EGOC subunit) in response to amino acid limitation, thereby resulting in activation of TORC1 signaling; SEA is a coatomer-related complex that associates dynamically with the vacuole; contai…	0.027335	-0.0873513	0.0412812	-0.0107937	-0.00719875	-0.0213713	-0.070135	0.117371	-0.00304875	0.107986	0.0741275	0.221202	0.0645638	0.0341663	-0.0537037	-0.0293075	0.0654737	0.216194	-0.104224	-0.0449838	-0.034595	0.080855	0.0489025	-0.0905375	0.0403763	-0.199316	-0.0927537	0.0240288
YBL105C	PKC1	Protein serine/threonine kinase; essential for cell wall remodeling during growth; localized to sites of polarized growth and the mother-daughter bud neck; homolog of the alpha, beta, and gamma isoforms of mammalian protein kinase C (PKC)	-0.0163137	0.0511363	0.0028525	0.0037725	-0.04827	-0.00338375	0.012495	0.068735	-0.0070575	0.0281337	0.0101825	0.118355	0.109976	0.163745	-0.006785	-0.0616525	0.0700275	-0.0451787	-0.0856925	0.301144	-0.0158375	0.0628712	-0.0285737	-0.492988	0.0222025	-0.22121	-0.0322325	-0.0334075
YBL106C	SRO77	Protein with roles in exocytosis and cation homeostasis; functions in docking and fusion of post-Golgi vesicles with plasma membrane; regulates cell proliferation and colony development via the Rho1-Tor1 pathway; interacts with SNARE protein Sec9p; homolog of Drosophila lethal giant larvae tumor suppressor; SRO77 has a paralog, SRO7, that arose from the whole genome duplication	0.0394687	-0.193049	0.0044525	0.0071825	-0.04342	-0.101055	-0.03419	-0.0428212	-0.0235775	0.0785575	-0.00640125	0.051605	0.064015	-0.18245	0.0208413	0.0241337	0.07836	-0.159551	-0.126196	-0.01697	0.0780888	0.0224125	0.0209187
YBL107C	MIX23	Mitochondrial intermembrane space protein of unknown function; imported via the MIA import machinery; contains an unusual twin cysteine motif (CX13C CX14C)	0.08828	0.186979	0.019285	-0.0097125	0.0120525	-0.049805	-0.0527525	0.163901	-0.0065625	0.0282563	0.0226387	-0.182658	0.0362275	0.079705	0.01668	0.0090175	0.049755	-0.0745475	0.0234475	-0.0154575	0.0680612	0.0083125	0.036065	1.07621	0.875886	-0.00207375	0.313645	0.721836
YBL108C-A	PAU9	Protein of unknown function; member of the seripauperin multigene family encoded mainly in subtelomeric regions; SWAT-GFP and mCherry fusion proteins localize to the endoplasmic reticulum and vacuole respectively	0.155025	-0.0771325	-0.02597	0.114326	0.16053	-0.152448	0.0407725	0.102015	0.041185	-0.0326225	0.129525	-0.0240825	-0.0235475	0.0063	0.02097	-0.024465	0.018285	-0.00661	-0.166485	0.001285	-0.063915	-0.054365	-0.0240425
YBL109W		Dubious open reading frame; unlikely to encode a functional protein, based on available experimental and comparative sequence data	0.04058	0.0289775	-0.00277	0.149911	0.0169125	-0.0163825	0.0514488	0.104329	-0.01702	-0.059995	-0.0509163	0.02392	0.0221325	0.0220725	-0.0112338	0.0292162	0.018425	0.107915	-0.021335	-0.001235	0.0237475	-0.0208687	0.0315863
YBL111C		Helicase-like protein encoded within the telomeric Y' element; relocalizes from mitochondrion to cytoplasm upon DNA replication stress	-0.176825		-0.140854	-0.158434		0.0008	0.230967	0.22215	0.2278	-0.0356788	0.128587	0.19446	-0.53353	-0.015905			-0.01725	0.196337	-0.41603	-0.251318	0.0377688	-0.031785	-0.14387	0.268356	-0.0734238	-0.296026	-0.0205475	-0.0351863
YBL112C		Putative protein of unknown function; YBL112C is contained within TEL02L	0.004485	-0.0339325	0.0635187	-0.00034	0.022285	-0.0434275	0.0195638	0.022315	-0.0398675	-0.0079775	0.044275	-0.078725	-0.022035	0.007025	-0.0127925	0.005615	0.0367237	0.0253925	0.048845	-0.00365	-0.0282075	-0.0297275	0.02208
YBL113C		Helicase-like protein encoded within the telomeric Y' element	0.0491375	-0.170064	-0.10354	-0.0539437	0.0091375	-0.026685	-0.0364	-0.378364	-0.0116138	-0.0196875	0.0446125	-0.0957013	-0.0154512	0.44534	-0.078415	0.0667013	0.0131337	-0.0271	-0.116784	-0.0278238	-0.0258237	-0.0509688	-0.04954
YBR001C	NTH2	Putative neutral trehalase, required for thermotolerance; may mediate resistance to other cellular stresses; NTH2 has a paralog, NTH1, that arose from the whole genome duplication	-0.0287075	-0.158704	0.0345712	0.0761562	-0.1281	-0.0005	-0.044225	0.0267838	0.0787812	0.0049775	0.042735	-0.0333787	0.0185237	-0.08786	0.075955	0.0774938	0.0134862	0.0079025	0.0280288	-0.0435637	0.0249587	-0.0119513	-0.0258425	-0.0947175	-0.220639	-0.05657	0.021345	-0.0102825
YBR002C	RER2	Forms the dehydrodolichyl diphosphate syntase (DDS) complex with NUS1; major enzyme of polyprenol synthesis in both the endoplasmic reticulum (ER) and in lipid droplets; participates in ER protein sorting; human ortholog DHDDS functionally complements the heat sensitive growth defect of a ts allele, and is associated with retinitis pigmentosa	0.0529225	-0.168462	0.0627888	0.0146675	0.0007175	-0.0436412	-0.259384	0.00913125	-0.0506962	0.0702175	0.0546463	-0.136362	0.0359037	-0.0164613	-0.0293925	0.033875	-0.049405	-0.0579438	-0.00061125	0.0631788	0.01463	-0.07856	-0.119121	0.139	0.898249	-0.0740725	0.132465	-0.136962
YBR003W	COQ1	Hexaprenyl pyrophosphate synthetase; catalyzes the first step in ubiquinone (coenzyme Q) biosynthesis	-0.217091	0.0363638	-0.0381187	-0.00142375	-0.06576	0.01664	-0.02143	-0.09748	-0.060855	0.0650563	-0.0110212	0.05858	0.0172913	0.014985	0.0214425	-0.0330475	0.0549437	0.0199675	-0.012795	-0.083035	-0.0447225	-0.0230487	-0.0320825	-0.164554	0.0187087	0.248262	-0.312411	-0.173596
YBR004C	GPI18	Functional ortholog of human PIG-V; PIG-V is a mannosyltransferase that transfers the second mannose in glycosylphosphatidylinositol biosynthesis; the authentic, non-tagged protein was localized to mitochondria	-0.38993	1.60048	-0.933042	-0.309978	2.40593	-0.11022	0.06938	0.294646	-0.412442	0.179335	0.144732	-0.0278775	-0.046735	-0.0217175			0.291567	0.100655	0.0931975	0.014925	0.08082	0.44088	-0.326753
YBR005W	RCR1	Protein of the ER membrane involved in cell wall chitin deposition; may function in the endosomal-vacuolar trafficking pathway, helping determine whether plasma membrane proteins are degraded or routed to the plasma membrane; RCR1 has a paralog, RCR2, that arose from the whole genome duplication	-0.0013675	0.0324325	0.0577037	-0.0283562	0.12401	0.082265	0.0530612	0.09437	0.0370938	0.0354438	-0.0131088	-0.018105	-0.030175	-0.083475	-0.0241638	-0.0494575	0.0655625	0.0386525	-0.0101225	-0.05062	0.0570725	-0.054295	-0.04828	-0.395415	-0.245106	-0.125878	0.19822	0.00725125
YBR006W	UGA2	Succinate semialdehyde dehydrogenase; involved in the utilization of gamma-aminobutyrate (GABA) as a nitrogen source; part of the 4-aminobutyrate and glutamate degradation pathways; localized to the cytoplasm	-0.0216462	0.00921875	0.0174125	-0.0959088	0.0149425	-0.0147275	0.00858	0.108441	-0.108684	0.106158	-0.0105863	-0.018325	0.0020475	0.0457975	-0.0117663	0.03794	-0.028145	0.005075	0.0291437	-0.00587625	-0.021555	-0.0097275	0.0006025	-0.00025	0.264685	0.06261	-0.05659	-0.119637
YBR007C	DSF2	Deletion suppressor of mpt5 mutation; relocalizes from bud neck to cytoplasm upon DNA replication stress	0.0193287	0.075395	-0.0984325	0.0341525	-0.077795	-0.004025	-0.042965	-0.0831375	-0.014225	0.03944	-0.02262	-0.0482875	-0.0469225	-0.08476	-0.034835	-0.0210362	-0.0620363	-0.01964	-0.0118888	-0.0922125	-0.01322	8.25e-05	0.013245	0.150771	-0.185679	-0.0105713	-0.143487	0.159421
YBR008C	FLR1	Plasma membrane transporter of the major facilitator superfamily; member of the 12-spanner drug:H(+) antiporter DHA1 family; involved in efflux of fluconazole, diazaborine, benomyl, methotrexate, and other drugs; expression induced in cells treated with the mycotoxin patulin; relocalizes from nucleus to plasma membrane upon DNA replication stress	0.0433325	0.023765	0.0771225	0.0287512	0.092115	0.014545	0.0632025	0.0613525	-0.005245	0.0291975	0.0198375	-0.0441375	-0.04224	-0.0161575	-0.00963	-0.0332125	-0.056765	-0.0541637	-0.0612938	-0.0486475	-0.0241675	0.0012625	-0.00299125	0.0413988	-0.0764588	-0.107808	-0.309894	-0.0513875
YBR009C	HHF1	Histone H4; core histone protein required for chromatin assembly and chromosome function; one of two identical histone proteins (see also HHF2); contributes to telomeric silencing; N-terminal domain involved in maintaining genomic integrity	0.20989	-0.0323275	0.0453825	-0.0238037	0.114531	0.030545	0.13405	-0.254521	-0.138793	0.275332	0.00933625	0.02568	0.0409962	0.0608325	0.0411425	-0.0470725	0.114473	-0.105795	-0.00413875	0.0045775	-0.00811	-0.088055	-0.02376	-0.213413	-0.0884025	0.0648513	0.0504188	-0.0245175
YBR010W	HHT1	Histone H3; core histone protein required for chromatin assembly, part of heterochromatin-mediated telomeric and HM silencing; one of two identical histone H3 proteins (see HHT2); regulated by acetylation, methylation, and phosphorylation; H3K14 acetylation plays an important role in the unfolding of strongly positioned nucleosomes during repair of UV damage	-0.02615	-0.13411	0.020415	0.03656	0.0411275	0.007475	-0.08853	-0.161052	-0.0223712	0.07588	-0.0269638	-0.0053325	0.029025	0.0476	-0.0328875	-0.081215	0.165447	0.0273675	-0.03548	-0.0700825	-0.01836	-0.04133	0.0041225	-0.148961	-0.168714	-0.122325	-0.0645175	-0.0890575
YBR011C	IPP1	Cytoplasmic inorganic pyrophosphatase (PPase); homodimer that catalyzes the rapid exchange of oxygens from Pi with water, highly expressed and essential for viability, active-site residues show identity to those from E. coli PPase	0.0423987	0.0505175	0.323082	-0.0494988	0.0454575	-0.0344337	-0.0377975	-0.032625	0.0209212	-0.00171875	0.0952275	0.0123088	0.627892	0.244872	0.0436525	0.034095	0.342846	-0.0874425	0.136261	0.123798	0.154914	-0.0276762	0.0188388	-0.49931	0.140065	0.036755	-0.175102	-0.120371
YBR012C		Dubious open reading frame; unlikely to encode a functional protein, based on available experimental and comparative sequence data; expression induced by iron-regulated transcriptional activator Aft2p	-0.0433425	0.0735	-0.00131	0.0199375	-0.0400475	0.0050225	-0.0306188	0.03184	-0.0205388	0.0047625	0.00349	-0.169064	-0.0096925	-0.00622	-0.0769125	-0.044215	0.141893	-0.00896875	0.02744	-0.018315	-0.014725	-0.0960775	-0.12082
YBR013C		Putative protein of unknown function; haploid deletion mutant exhibits synthetic phenotype with alpha-synuclein; SWAT-GFP fusion protein localizes to the endoplasmic reticulum while mCherry fusion protein localizes to both the endoplasmic reticulum and vacuole	0.0853275	0.179239	0.28696	-0.00954625	0.0011425	0.0532263	0.148936	-0.202005	0.04331	0.0134488	-0.012745	-0.261703	-0.08674	0.178317	0.183839	-0.00155875	0.0736	0.0118937	0.0151763	-0.0200375	-0.0703375	-0.0242237	-0.00556
YBR015C	MNN2	Alpha-1,2-mannosyltransferase; responsible for addition of the first alpha-1,2-linked mannose to form the branches on the mannan backbone of oligosaccharides, localizes to an early Golgi compartment	-0.022435	-0.0262725	-0.060215	-0.0381575	-0.081115	-0.00631125	-0.109995	-0.43642	-0.133095	-0.0399675	-0.0123237	-0.0864888	-0.0848725	-0.0566837	0.0118625	-0.00917625	-0.0705175	-0.0323375	-0.263207	0.0128775	0.01063	-0.111935	-0.105005	-0.109156	-0.0350437	-0.0235388	-0.07127	-1.73472e-18
YBR016W		Tail-anchored plasma membrane protein with a conserved CYSTM module; predicted to be palmitoylated; has similarity to hydrophilins, which are involved in the adaptive response to hyperosmotic conditions; YBR016W has a paralog, YDL012C, that arose from the whole genome duplication	-0.0122512	-0.141495	0.0054825	-0.129123	-0.0476438	-0.05374	-0.142445	-0.0476063	0.0697975	-0.00013125	-0.003735	0.0318075	0.069725	-0.135162	-0.0226275	-0.0542325	0.0273413	0.018565	0.0276275	0.03998	-0.0030725	-0.09909	0.0564375	0.316941	0.0351187	-0.02754	0.043095	0.157512
YBR017C	KAP104	Transportin or cytosolic karyopherin beta 2; functions in the rg-nuclear localization signal-mediated nuclear import/reimport of mRNA-binding proteins Nab2p and Hrp1p; regulates asymmetric protein synthesis in daughter cells during mitosis	0.0017625	-0.107736	0.14396	0.03032	-0.0103938	0.0370538	0.0053825	0.0475	0.0822637	-0.0364063	0.05609	0.17394	0.0681725	0.0829775	0.0219825	0.0335625	0.159612	-0.0155375	0.0407937	0.0341463	0.00185875	0.03028	0.108491	-0.421667	0.00107875	-0.127569	-0.0413262	-0.0455362
YBR018C	GAL7	Galactose-1-phosphate uridyl transferase; synthesizes glucose-1-phosphate and UDP-galactose from UDP-D-glucose and alpha-D-galactose-1-phosphate in the second step of galactose catabolism; human homolog UGP2 can complement yeast null mutant	0.159245	-0.0612325	-0.00426625	-0.0024775	0.0166	-0.0499875	-0.0453187	-0.0554788	-0.147339	-0.152325	0.01316	0.0569175	-0.37506	-0.0205575	-0.148024	-0.0162363	0.113625	0.0403075	-0.03621	-0.03737	-0.156685	-0.08479	-0.207755
YBR020W	GAL1	Galactokinase; phosphorylates alpha-D-galactose to alpha-D-galactose-1-phosphate in the first step of galactose catabolism; expression regulated by Gal4p; human homolog GALK2 complements yeast null mutant; GAL1 has a paralog, GAL3, that arose from the whole genome duplication	0.126595	-0.45683	0.38018	0.255116	-0.03488	0.138921	-0.117135	-0.073645	-0.410806	-0.26124	-0.226964	0.435856	-0.503348	-0.172485	0.0464775	-0.111645	-0.255487	-0.001535	-0.343988	0.16177	0.352807	-0.060995	0.207621
YBR021W	FUR4	Plasma membrane localized uracil permease; expression is tightly regulated by uracil levels and environmental cues; conformational alterations induced by unfolding or substrate binding result in Rsp5p-mediated ubiquitination and degradation	-0.176577		-0.201072	-0.0498487		0.0983975	-0.402722	-0.354743	0.0347475	-0.0029225	-0.102165	-0.0064625	-0.118612	0.026535	-0.001465	-0.0195475	0.124695	-0.09129	-0.122639	0.00058	-0.0557837	-0.164279	0.211785
YBR022W	POA1	Phosphatase that is highly specific for ADP-ribose 1''-phosphate; a tRNA splicing metabolite; may have a role in regulation of tRNA splicing	0.0382425	0.0368725	0.03313	-0.008005	-0.0618375	-0.12968	-0.02688	-0.109107	0.00174	-0.0392725	0.0055625	-0.01904	0.0691737	-0.0800375	-0.06181	-0.042495	-0.0327475	-0.09437	-0.0026175	0.0163	0.0047575	-0.0282375	-0.046465
YBR023C	CHS3	Chitin synthase III; catalyzes the transfer of N-acetylglucosamine (GlcNAc) to chitin; required for synthesis of the majority of cell wall chitin, the chitin ring during bud emergence, and spore wall chitosan; contains overlapping di-leucine and di-acidic signals that mediate, respectively, intracellular trafficking by AP-1 and trafficking to plasma membrane by exomer complex; requires AP-3 compl…	0.13081	-0.238334	0.054355	0.0810613	-0.200121	0.0540163	-0.0513275	0.251721	-0.26755	0.176605	-0.02004	0.0188812	0.0214875	-0.0031125	-0.0503175	0.0428775	0.0261775	-0.00971625	-0.01515	0.09189	-0.02129	-0.01185	-0.0144175	0.107216	-0.0737175	-0.037925	-0.0128425	-0.230941
YBR024W	SCO2	Protein anchored to mitochondrial inner membrane; may have a redundant function with Sco1p in delivery of copper to cytochrome c oxidase; interacts with Cox2p; SCO2 has a paralog, SCO1, that arose from the whole genome duplication	0.015375	-0.092025	0.0089875	0.0120875	-0.118322	0.0226487	-0.0319587	0.0321162	-0.0396188	0.09722	0.00213875	-0.0772975	0.00283125	0.0200787	-0.0163125	0.007635	0.131587	0.0703287	-0.0629238	-0.0753487	-0.008865	-0.05068	0.0411637
YBR025C	OLA1	P-loop ATPase with similarity to human OLA1 and bacterial YchF; identified as specifically interacting with the proteasome; null mutant displays increased translation rate and increased readthrough of premature stop codons; protein abundance increases in response to hydrogen peroxide and to DNA replication stress	0.0326837	0.06745	0.0434512	0.001385	0.129665	-0.02703	-0.0178887	0.0392425	0.0311713	-0.321692	-0.0244125	-0.105191	-0.0989575	-0.02352	-0.017345	-0.059825	0.00911375	-0.00607875	-0.089715	-0.01516	0.00969375	-0.0345925	-0.0067275	0.0561325	0.167398	-0.235882	0.08241	0.13086
YBR026C	ETR1	2-enoyl thioester reductase; member of the medium chain dehydrogenase/reductase family; localized to mitochondria, where it has a probable role in fatty acid synthesis; human MECR functionally complements the respiratory growth defect of the null mutant	0.0429375	0.00903875	-0.0387887	0.0129287	0.00865375	0.0151325	-0.0255425	-0.144821	0.14209	-0.101625	0.03176	-0.04752	0.0158	-0.006885	0.081795	-0.0095375	0.103222	-0.046445	-0.0595437	0.0555975	-0.0762175	-0.124268	-0.02271	-0.0250312	-0.08411	0.0211775	-0.0606388	-0.115875
YBR027C		Putative protein of unknown function; conserved among S. cerevisiae strains; YBR027C is not an essential gene	0.0193275	-0.072015	-0.08227	0.0448762	-0.0155362	0.00623	-0.126972	-0.0465988	0.0864425	-0.0690675	-0.00968625	-0.03231	-0.0496638	-0.03065	-0.00912	-0.01129	-0.114852	0.044355	-0.0647237	-0.0152425	-0.0685275	-0.013785	0.049475
YBR028C	YPK3	AGC kinase; phosphorylated by cAMP-dependent protein kinase (PKA) in a TORC1-dependent manner; directly phosphorylated by TORC1; phosphorylates ribosomal protein Rps6a/b (S6), in a TORC-dependent manner; undergoes autophosphorylation	0.07465		-0.104108	0.0541288		0.0470375	-0.0545575	-0.0366575	-0.159922	-0.0940775	0.0110262	-0.162705	-0.0717125	-0.10885			-0.0252175	-0.116943	-0.226208	0.014825	-0.016625	0.0095675	0.022385	-0.197805	-0.0976475	0.227005	0.03529	-0.0427737
YBR029C	CDS1	Phosphatidate cytidylyltransferase (CDP-diglyceride synthetase); an enzyme that catalyzes that conversion of CTP + phosphate into diphosphate + CDP-diaclglyerol, a critical step in the synthesis of all major yeast phospholipids; human homolog CDS1 can complement yeast cds1 null mutant	-0.0153575		-0.112796	-0.0836525		0.118056	-0.0495975	-0.115539	0.797515	-0.669919	-0.0404875	-0.006865	-0.30074	-0.179441		-0.382596	-0.0258412	-0.100778	0.401356	-0.254335	0.0051725	-0.0262038	0.267984
YBR031W	RPL4A	Ribosomal 60S subunit protein L4A; N-terminally acetylated; homologous to mammalian ribosomal protein L4 and bacterial L4; RPL4A has a paralog, RPL4B, that arose from the whole genome duplication	0.045315	-0.0233563	0.008815	-0.32854	-0.09164	-0.01224	-0.189023	0.0226225	-0.117591	-0.0925263	0.0798925	0.071045	-0.053165	0.0700787	-0.137226	-0.0566313	0.131133	0.269672	-0.0974812	-0.153987	-0.048075	-0.0156137	0.0084125
YBR033W	EDS1	Putative zinc cluster protein, predicted to be a transcription factor; not an essential gene; EDS1 has a paralog, RGT1, that arose from the whole genome duplication	0.0041225	0.04619	0.000435	0.0770687	0.0889025	0.01695	-0.0126525	-0.165178	0.107823	0.0258712	0.0460575	-0.004165	-0.054065	-0.005015	-0.0209675	-0.027845	-0.102032	-0.035655	-0.141224	0.00738125	-0.03175	0.01348	-0.0161325
YBR034C	HMT1	Nuclear SAM-dependent mono- and asymmetric methyltransferase; modifies hnRNPs, including Npl3p and Hrp1p, affecting their activity and nuclear export; methylates U1 snRNP protein Snp1p, ribosomal protein Rps2p, and histones H3 and H4; interacts genetically with genes encoding components of Rpd3(L) and this interaction is important for Rpd3 recruitment to the subtelomeric region	0.0140075	-0.19122	-0.0187413	-0.003185	0.013985	-0.0536175	0.10112	-0.0930963	-0.0266775	-0.110753	-0.03988	-0.0804275	0.003685	0.03388	0.0186	-0.0365225	0.141953	0.166683	0.0134	0.0183725	-0.0207325	0.123622	0.0123912	0.0260675	1.60171	-0.137588	-0.320985	-0.34703
YBR036C	CSG2	Endoplasmic reticulum membrane protein; required for mannosylation of inositolphosphorylceramide and for growth at high calcium concentrations; protein abundance increases in response to DNA replication stress	0.031035	0.280555	-0.0375388	0.162439	0.10502	0.153086	0.36946	-0.11098	0.57927	0.114189	-0.149669	0.984312	0.830777	0.513365	0.105905	0.0623725	0.325238	0.0241625	0.47171	0.601225	-0.0755975	0.247295	0.123368	0.07938	0.0115563	0.1752	-0.27958	-0.171505
YBR037C	SCO1	Copper-binding protein of mitochondrial inner membrane; required for cytochrome c oxidase activity and respiration; may function to deliver copper to cytochrome c oxidase; similar to thioredoxins; SCO1 has a paralog, SCO2, that arose from the whole genome duplication	-0.013745	0.101445	-0.0186775	-0.0342212	-0.235712	0.0196025	0.0700438	-0.139568	0.143467	0.0380687	-0.0263062	0.0205688	-0.0411275	-0.0084725	-0.02456	-0.114015	0.0458275	0.00773625	-0.06041	-0.0258587	-0.141005	-0.111247	-0.01023	0.03572	0.409271	-0.223202	0.0979675	-0.0068725
YBR038W	CHS2	Chitin synthase II; catalyzes transfer of N-acetylglucosamine (GlcNAc) to chitin upon activation of zymogenic form; required for chitin synthesis in the primary septum during cytokinesis; localization regulated by Cdk1p during mitosis; phosphorylation by Dbf2p kinase regulates its dynamics and chitin synthesis during cytokinesis	0.0381762	0.145335	0.068165	-0.05168	0.190491	-0.0206925	-0.176819	0.169324	-0.0953075	-0.0218475	0.0882388	-0.0840487	0.0214412	-0.0226	-0.056825	0.0238975	-0.112348	0.0744225	-0.0999	0.028415	0.168552	-0.148485	-0.0341262
YBR039W	ATP3	Gamma subunit of the F1 sector of mitochondrial F1F0 ATP synthase; F1F0 ATP synthase is a large, evolutionarily conserved enzyme complex required for ATP synthesis	-0.0167337	0.287571	-0.02183	0.0538262	0.078125	-0.015345	0.0388175	0.0074425	0.0528825	-0.212731	-0.0519563	0.059665	-0.0725575	-0.0488162	-0.0420625	0.0195675	0.167513	0.0135062	-0.0664862	0.0787613	0.0142087	-0.00923125	-0.0542075	0.0503788	-0.0063875	-0.0582763	0.04113	0.04663
YBR040W	FIG1	Integral membrane protein required for efficient mating; may participate in or regulate the low affinity Ca2+ influx system, which affects intracellular signaling and cell-cell fusion during mating	-0.038455	-0.082525	-0.0386587	0.0512275	0.123401	-0.0363575	-0.03125	-0.099815	0.12483	0.03607	0.01214	0.0180275	-0.0782825	0.033095	-0.0217275	0.0189725	-0.0281125	0.072	-0.193257	0.0040875	-0.050735	-0.02194	-0.010035
YBR041W	FAT1	Very long chain fatty acyl-CoA synthetase and fatty acid transporter; activates imported fatty acids with a preference for very long lengths (C20-C26); has a separate function in the transport of long chain fatty acids	-0.100693	-0.0379312	-0.0664275	0.0211537	0.102445	-0.161518	0.15724	-0.148595	0.0707025	0.01618	-0.1002	-0.03446	0.102825	-0.0148925	-0.0255375	-0.005065	-0.03032	0.025395	-0.0827662	0.05996	0.0333388	0.207526	0.0236125	0.372953	0.16982	0.0902188	-0.340926	0.0911475
YBR042C	CST26	Acyltransferase; enzyme mainly responsible for the introduction of saturated very long chain fatty acids into neo-synthesized molecules of phosphatidylinositol; required for incorporation of stearic acid into phosphatidylinositol; affects chromosome stability when overexpressed; CST26 has a paralog, YDR018C, that arose from the whole genome duplication	0.145632	-0.0644275	-0.016075	-0.00922375	0.0296825	0.0478712	-0.05001	-0.122758	-0.0667875	0.148466	-0.0144762	-0.01556	0.0275675	0.005095	-0.00803	-0.0045875	-0.0213675	-0.031495	-0.10384	0.10255	0.0462475	0.0791825	0.0257675	-0.0876312	-0.0696025	-0.0226587	-0.0089025	-0.037735
YBR043C	QDR3	Multidrug transporter of the major facilitator superfamily; member of the 12-spanner drug:H(+) antiporter DHA1 family; has a role in polyamine homeostasis; involved in spore wall asembly; sequence similarity to DTR1 and QDR1, and the triple mutant dtr1 qdr1 qdr3 exhibits reduced dityrosine fluorescence relative to the single mutants; expression is upregulated under polyamine stress; required for …	0.00688875	-0.0244225	0.052875	-0.0089075	0.0749675	-0.0459438	-0.0219275	0.0531688	0.217249	0.17778	0.03793	-0.0152587	0.02908	0.0205337	0.0563112	0.023015	0.0875225	0.0781437	0.133006	-0.045845	0.014745	0.0113225	-0.0429638	-0.238096	0.016265	-0.190494	0.04541	0.06071
YBR044C	TCM62	Protein involved in assembly of the succinate dehydrogenase complex; mitochondrial; putative chaperone	0.168031	-0.143393	-0.0205725	0.0022025	-0.0983825	0.00109375	0.081915	-0.0755513	-0.0521975	0.0872475	0.06727	-0.13886	-0.0276125	-0.0787575	-0.0310425	0.02289	-0.0468363	-0.110132	-0.334695	-0.00402	0.132374	-0.0539125	0.0785963
YBR045C	GIP1	Meiosis-specific regulatory subunit of the Glc7p protein phosphatase; regulates spore wall formation and septin organization, required for expression of some late meiotic genes and for normal localization of Glc7p	-0.518091	1.06109	-0.232143	-0.0713188	2.32518	-0.169736	-0.157537	0.1365	0.201036	-0.105369	0.10205	-0.0206875	0.0004575	-0.27018			0.412875	0.267502	0.535085			0.175448	-0.405587
YBR046C	ZTA1	NADPH-dependent quinone reductase; GFP-tagged protein localizes to the cytoplasm and nucleus; has similarity to E. coli quinone oxidoreductase and to human zeta-crystallin	0.05746	0.024885	0.0685962	-0.112113	0.10877	-0.03018	-0.068515	-0.0601363	0.0528762	0.725636	0.0060975	-0.0207425	-0.05361	-0.0710275	0.0868375	0.036645	-0.0828875	0.037105	0.05612	0.08573	0.0145725	-0.045315	-0.037635	0.72318	0.884985	-0.0365725	-0.0345225	0.0352512
YBR047W	FMP23	Putative protein of unknown function; proposed to be involved in iron or copper homeostasis; the authentic, non-tagged protein is detected in highly purified mitochondria in high-throughput studies	-0.0321625	-0.0134975	0.0141075	0.00929875	0.03313	0.004825	0.0021275	-0.0691887	0.0574925	-0.040155	0.0525612	0.0146812	-0.0338225	0.05327	0.06551	0.064185	0.0408875	-0.0211437	-0.03784	-0.0210525	-0.0219787	-0.0155137	-0.00716625	-0.0558925	0.017905	-0.0641075	-0.0638963	-0.0067025
YBR048W	RPS11B	Protein component of the small (40S) ribosomal subunit; homologous to mammalian ribosomal protein S11 and bacterial S17; RPS11B has a paralog, RPS11A, that arose from the whole genome duplication	0.146155	-0.110851	-0.0667313	-0.0167288	0.419109	-0.0113312	0.200387	-0.14416	0.062315	0.0396188	0.05064	-0.00026	0.0799312	0.0572262	0.113712	0.0192387	0.0057	0.14586	-0.222615	-0.19565	0.28615	0.137098	0.0810625	0.955635	0.616915	-0.11843	0.0450475	-0.120341
YBR049C	REB1	RNA polymerase I enhancer binding protein; DNA binding protein that binds to genes transcribed by both RNA polymerase I and RNA polymerase II; required for termination of RNA polymerase I transcription; Reb1p bound to DNA acts to block RNA polymerase II readthrough transcription	-0.0574275	0.207025	0.0639675	0.233767	1.72311	0.239817	0.0458225	0.37138	0.680368	-0.0121762	0.0744713	-0.220339	0.79375	-0.12388	-0.00827875	0.0487825	-0.0814325	-0.0109213	0.0882062	0.322589	0.129208	-0.103036	-0.0199488	0.0553125	-0.00194	0.204774	-0.0191825	0.376839
YBR050C	REG2	Regulatory subunit of the Glc7p type-1 protein phosphatase; involved with Reg1p, Glc7p, and Snf1p in regulation of glucose-repressible genes, also involved in glucose-induced proteolysis of maltose permease; REG2 has a paralog, REG1, that arose from the whole genome duplication	0.14446	-0.00870625	0.014735	0.00941	-0.103516	0.0211025	-0.0068825	0.0359462	-0.008345	-0.01231	0.00239	-0.0635475	-0.00327625	-0.0242125	0.0473613	0.00206375	0.033925	-0.00606	0.0002225	0.00265875	-0.0286588	0.0431588	-9.75e-05
YBR051W		Dubious open reading frame; unlikely to encode a functional protein, based on available experimental and comparative sequence data; partially overlaps the REG2/YBR050C regulatory subunit of the Glc7p type-1 protein phosphatase	-0.0578313	-0.091365	-0.0206362	0.0182	-0.259575	-0.0200038	0.136665	-0.0803612	0.0460725	-0.12898	-0.024045	0.0438	0.0047225	-0.070815	-0.00434875	-0.01097	-0.0472475	0.0592	0.0476562	-0.075285	0.015505	0.041565	-0.068345
YBR052C	RFS1	Protein of unknown function; member of a flavodoxin-like fold protein family that includes Pst2p and Ycp4p; green fluorescent protein (GFP)-fusion protein localizes to the cytoplasm in a punctate pattern; RFS1 has a paralog, PST2, that arose from the whole genome duplication	-0.14251	0.0709275	0.0408263	0.0027425	-0.0169975	-0.00557	0.0358012	-0.0955975	-0.0943863	0.0047025	-0.0355825	-0.0257025	0.0444512	0.105097	-0.0879013	-0.0180137	0.00342125	-0.0749025	-0.0944688	0.00580375	-0.07358	-0.00843	0.262915	0.026775	0.120436	-0.123633	-0.200061	-0.133162
YBR053C		Putative protein of unknown function; induced by cell wall perturbation	-0.14724	0.00061625	0.162641	-0.0313825	0.123811	0.030105	0.0378125	0.0956237	0.0720175	0.0819537	0.0316763	0.376314	0.106325	-0.0781675	-0.00062875	0.086795	0.0448088	0.138362	-0.563129	0.0867925	-0.122614	-0.269496	0.0781888
YBR054W	YRO2	Protein with a putative role in response to acid stress; null mutant is sensitive to acetic acid; transcription is regulated by Haa1p and induced in the presence of acetic acid; protein observed in plasma membrane foci in the presence of acetic acid; the authentic, non-tagged protein is detected in a phosphorylated state in highly purified mitochondria in high-throughput studies	0.0327825	0.236415	-0.015985	0.152394	0.0208275	-0.123603	-0.0605412	-0.131412	0.0243925	0.134274	0.0154088	-0.0813588	0.0910575	0.17728	0.002325	-0.05339	0.110885	-0.0573662	-0.0391825	0.0605412	-0.00207	-0.084465	0.02695	0.050315	-0.0612225	-0.134362	-0.0269687	-0.008105
YBR055C	PRP6	Splicing factor; component of the U4/U6-U5 snRNP complex	-0.0140375	0.12901	0.122268	-0.022235	0.0425825	0.0473762	0.0195925	-0.005215	0.058585	-0.0206838	-0.0508212	0.0429975	0.0265288	0.02878	-0.100549	-0.0437063	0.0472687	0.0333463	0.122271	0.0149112	-0.014565	-0.0128663	-0.036785	-0.00992875	0.0049575	-0.0886337	-0.02242	-0.0621213
YBR056W		Putative glycoside hydrolase of the mitochondrial intermembrane space	-0.034485	-0.128708	-0.0374862	0.00071625	-0.0009125	0.001685	-0.125945	0.0991925	-0.0697513	-0.139034	0.0404412	0.005005	0.0456875	0.0394025	0.038555	-0.05053	0.13984	0.03887	-0.0108175	0.00413	-0.0161425	-0.01857	-0.005215	0.129592	-0.05585	0.227475	0.01421	0.0248913
YBR057C	MUM2	Protein essential for meiotic DNA replication and sporulation; cytoplasmic protein; subunit of the MIS complex which controls mRNA methylation during during the induction of sporulation; also interacts with Orc2p, which is a component of the origin recognition complex	0.112024	-0.106177	-0.00713875	0.00386125	0.0596825	-0.00442	0.0788875	0.0575737	-0.0739788	0.218501	-0.025315	0.00692	0.0486663	-0.0381213	-0.020025	-0.00803625	-0.0496313	-0.0186775	0.0903687	0.0192588	0.096405	0.0452025	-0.023565	-0.09471	0.106805	-0.105027	-0.038865	0.07499
YBR058C	UBP14	Ubiquitin-specific protease; specifically disassembles unanchored ubiquitin chains; involved in fructose-1,6-bisphosphatase (Fbp1p) degradation; similar to human isopeptidase T	0.0332025	-0.0777975	-0.00467625	0.0016625	-0.0906425	-0.00935625	0.0473237	0.0490662	-0.0183925	-0.0265975	-0.0170262	-0.00222375	0.0316575	-0.00719	0.0901875	0.0389162	0.00614	-0.047615	0.0380825	-0.068175	0.0378325	-0.0218262	-0.0488863	-0.201598	-0.0057975	-0.050195	-0.03528	-0.03047
YBR058C-A	TSC3	Protein that stimulates the activity of serine palmitoyltransferase; involved in sphingolipid biosynthesis; Lcb1p and Lcb2p are the two components of serine palmitoyltransferase	-0.172822	0.22636	0.0293825	0.0987425	0.0049575	-0.00063	0.23663	0.0010925	0.08903	-0.146905	0.027425	0.0589225	-0.00013	0.00438	0.0035375	0.0474825	-0.00616375	-0.00233	0	0.031105	-0.0430963	0.00166625	0.0061075
YBR059C	AKL1	Ser-Thr protein kinase; member (with Ark1p and Prk1p) of the Ark kinase family; involved in endocytosis and actin cytoskeleton organization	0.0879662	-0.203504	0.0207625	-0.0004975	0.199875	0.123316	0.196247	-0.045905	0.08939	0.870676	0.06555	-0.007005	0.0487713	-0.04641	0.100875	0.0469275	-0.0135725	0.0131263	0.0479475	0.118959	0.0711275	0.0581513	0.0947962	0.0497725	0.278454	0.130733	0.0022775	0.43851
YBR060C	ORC2	Subunit of the origin recognition complex (ORC); ORC directs DNA replication by binding to replication origins and is also involved in transcriptional silencing; interacts with Spp1p and with trimethylated histone H3; phosphorylated by Cdc28p	0.34849	0.089865	0.222515	-0.0391562	1.50732	1.22174	0.25984	0.127867	-0.043055	-0.00936	0.0136087	0.154133	-0.068925	-0.0159	-0.0584125	0.02083	-0.112405	0.045645	-0.0338075	0.715496	-0.109455	-0.0083	-0.08789	0.219834	0.191816	0.30035	0.164275	-0.100672
YBR061C	TRM7	2'-O-ribose methyltransferase; methylates the 2'-O-ribose of tRNA-Phe, tRNA-Trp, and tRNA-Leu at positions C32 and N34 of tRNA anticodon loop; crucial biological role likely modification of tRNA-Phe; interacts with Trm732p and Rtt10p in 2'-O-methylation of C32 and N34 substrate tRNAs, respectively; yeast null mutant can be functionally complemented by human FTSJ1, mutations in which have been imp…	-0.010985	-0.208635	0.08556	0.0165113	0.23922	-0.0027	-0.0011075	0.0523962	0.0277263	0.126784	-0.133829	-0.03502	-0.004195	0.0070075	-0.0152488	0.005435	-0.094885	-0.030455	-0.151367	-0.014925	0.02315	0.00297375	0.0281925	-0.279575	-0.0341525	0.08447	0.08778	0.0382625
YBR062C		Protein of unknown function that interacts with Msb2p; may play a role in activation of the filamentous growth pathway	-0.0087725	0.0447137	-0.0281787	0.170453	0.00775375	-0.0722775	0.0757225	-0.218452	0.028435	-0.0126375	-0.0426762	0.011305	-0.523805	0.00043	-0.0220425	-0.0471475	-0.05318	0.069555	-0.478925	-0.0417725	-0.03654	0.103042	0.0160975
YBR063C		Putative protein of unknown function; YBR063C is not an essential gene	0.0001075	0.112102	-0.02927	-0.0037325	-0.15497	-0.0028475	0.153601	-0.115225	-0.0035925	-0.0888375	0.0300625	0.039265	0.0962625	0.105603	-0.16104	-0.0547575	-5.75e-05	0.0446225	0.0031875	-0.0417175	-0.06812	-0.0079425	0.0149825
YBR064W		Dubious open reading frame; unlikely to encode a functional protein, based on available experimental and comparative sequence data; partially overlaps the uncharacterized ORF YBR063C	0.0910525	-0.05297	-0.129215	-0.02208	-0.0773588	-0.00179125	0.04852	0.0160587	0.141216	-0.0847238	0.0306538	-0.0765462	-0.0714775	0.137393	0.0294725	-0.0221012	0.14381	0.0058325	-0.175	0.00220125	0.0647488	0.0999213	0.02046
YBR065C	ECM2	Pre-mRNA splicing factor; facilitates the cooperative formation of U2/U6 helix II in association with stem II in the spliceosome, function may be regulated by Slu7p	0.0730838	0.043525	-0.0416938	-0.0119662	-0.225387	0.06821	0.0217675	0.0171837	-0.0479612	0.0666262	0.0755975	-0.063665	0.0283312	-0.0292738	-0.07522	-0.0336987	0.224344	-0.00145	-0.00569125	-0.0294387	0.0361275	0.05138	-0.05622	-0.0786025	-0.038245	0.171237	0.098865	-0.004325
YBR066C	NRG2	Transcriptional repressor; mediates glucose repression and negatively regulates filamentous growth; activated in stochastic pulses of nuclear localization in response to low glucose	-0.009955	-0.01638	0.0318187	0.343404		0.0452825	0.0275225	0.115046	0.0601675	-0.0235725	-0.004335	-0.0071575	-0.149787	0.0130625	0.0555763	0.00785375	0.0306625	0.045715	-0.251305	0.0319075	-0.0832575	-0.049925	-0.0637	-0.198365	-0.139089	-0.142446	-0.010605	-0.137935
YBR067C	TIP1	Major cell wall mannoprotein with possible lipase activity; transcription is induced by heat- and cold-shock; member of the Srp1p/Tip1p family of serine-alanine-rich proteins	-0.0272825	0.0648725	0.0482638	-0.0185775	-0.0011975	-0.02653	0.057145	-0.0388675	-0.09744	-0.00078625	0.0267387	0.0399225	-0.0285187	-0.12137	-0.0299625	0.0160425	0.03965	0.012795	-0.051195	0.00165	-0.007995	0.0598175	-0.006075	0.0963825	0.899084	0.0024475	0.310355	0.251654
YBR068C	BAP2	High-affinity leucine permease; functions as a branched-chain amino acid permease involved in uptake of leucine, isoleucine and valine; contains 12 predicted transmembrane domains; BAP2 has a paralog, BAP3, that arose from the whole genome duplication	0.133534	-0.126596	0.001175	-0.0152725	0.06608	-0.02739	-0.179189	0.157447	-0.176989	0.0373263	-0.0813312	-0.0541575	-0.0088975	0.0034375	0.0199225	0.11369	-0.03799	0.0404337	-0.00123625	0.0117637	0.133664	0.0135363	0.0749025	0.033985	0.0981525	0.172894	-0.00808125	-0.23561
YBR069C	TAT1	Amino acid transporter for valine, leucine, isoleucine, and tyrosine; low-affinity tryptophan and histidine transporter; overexpression confers FK506 and FTY720 resistance; protein abundance increases in response to DNA replication stress	-0.029755		-0.03742	-0.0218		0.029125	0.115254	0.0548825	0.0858075	-0.07477	0.0139013	0.162697	-0.140407	0.008075	-0.00885	-0.085045	0.007085	0.13035	-0.113476	-0.0189025	-0.00789	0.00404	-0.0323825	-0.206296	0.115715	0.100466	0.0385387	-0.119219
YBR070C	ALG14	Component of UDP-GlcNAc transferase; required for second step of dolichyl-linked oligosaccharide synthesis; anchors catalytic subunit Alg13p to ER membrane; similar to bacterial and human glycosyltransferases; both human homologs ALG13 and ALG14 are required to complement yeast alg14 mutant	0.116745	0.012965	-0.0524763	-0.0646075	-0.288062	-0.00378625	0.249521	-0.130949	-0.0294788	0.0260525	0.0240863	0.0640475	-0.0652787	0.259764	-0.0241175	-0.0394925	0.144292	0.0793787	0.0629737	-0.300041	-0.0042375	0.54035	0.00886875	0.59062	-0.279417	-0.234352	-0.12974	-0.162735
YBR071W		Protein of unknown function found in the cytoplasm and bud neck; mRNA expression may be regulated by the cell cycle and/or cell wall stress; overexpression of YBR071W affects endocytic protein trafficking	0.0009625	0.0451213	-0.0223412	0.00119625	0.0283525	-0.014985	-0.08218	-0.0185762	-0.0833475	0.011035	0.0575375	-0.0450125	-0.02539	0.141625	-0.0566463	-0.0465187	0.001375	-0.00892	-0.074095	0.0196325	0.00436	-0.0192225	0.0756475	-0.132743	-0.0531025	-0.01386	0.025885	3.46945e-18
YBR072W	HSP26	Small heat shock protein (sHSP) with chaperone activity; forms hollow, sphere-shaped oligomers that suppress unfolded proteins aggregation; long-lived protein that is preferentially retained in mother cells and forms cytoplasmic foci; oligomer activation requires heat-induced conformational change; also has mRNA binding activity	0.01056	-0.0236475	0.113551	-0.0434325	-0.091975	-0.017915	0.00178625	0.0773175	-0.0126012	0.192915	-0.02561	0.11415	0.0630137	-0.01544	0.0265687	0.0104838	-0.0738588	0.097835	0.0370163	-0.0218962	0.076925	-0.0045475	0.10155	-0.225185	0.0708613	0.0669987	-0.412805	-0.502979
YBR073W	RDH54	DNA-dependent ATPase; DNA recombination/repair translocase, supercoils DNA and promotes DNA strand opening; stimulates strand exchange by modifying dsDNA topology; involved in recombinational repair of DNA double-strand breaks (DSBs) during mitosis and meiosis; phosphorylated in Mec1p-, Rad53p-dependent way in response to one DSB; contributes to remodelling of nucleosomes; proposed to be involved…	-0.0036375	-0.0866525	-0.05649	-0.105075	-0.16079	-0.00933125	-0.0246925	-0.0408875	0.0168475	0.00732125	0.0647012	-0.036095	-0.0160862	-0.017905	-0.171024	-0.0902262	0.0781738	-0.0327213	0.0494762	0.00689125	-0.0848775	-0.0230662	0.0342475	-0.13695	-0.0725213	0.00193	-0.104447	-0.0893525
YBR074W	PFF1	Multi-spanning vacuolar membrane protease; glycosylated transmembrane protein bearing homology to the M28 family of metalloproteases; has a lumenal-facing protease domain; proposed role in vacuole physiology	-0.0472725	0.12751	-0.0911675	-0.0512825	-0.058655	0.0433675	-0.138435	0.157144	-0.0942588	0.0424488	-0.0426775	0.077215	-0.0237975	0.0681487	0.139594	0.0878663	-0.0568663	0.012175	0.0547725	0	-0.0449387	-0.05083	-0.0763475
YBR074W	PFF1	Multi-spanning vacuolar membrane protease; glycosylated transmembrane protein bearing homology to the M28 family of metalloproteases; has a lumenal-facing protease domain; proposed role in vacuole physiology	-0.0472725	0.12751	-0.0911675	-0.0512825	-0.058655	0.0433675	-0.138435	0.157144	-0.0942588	0.0424488	-0.0426775	0.077215	-0.0237975	0.0681487	0.139594	0.0878663	-0.0568663	0.012175	0.0547725	0	-0.0449387	-0.05083	-0.0763475
YBR076W	ECM8	Non-essential protein of unknown function	0.101218	0.088625	0.0764787	-0.12954	-0.0788175	-0.004065	-0.0175825	-0.103279	-0.00986125	0.120656	-0.0561125	0.08076	0.02604	0.0190875	-0.0343125	-0.0308125	0.052145	0.0988	0.04218	0.116013	-0.041655	0.127387	0.012695
YBR077C	SLM4	Component of the EGO and GSE complexes; essential for integrity and function of EGO; EGO is involved in the regulation of microautophagy and GSE is required for proper sorting of amino acid permease Gap1p; gene exhibits synthetic genetic interaction with MSS4	0.0806812	0.35671	-0.0230475	-0.112925	0.0480138	0.0177812	0.116528	0.155315	0.0160525	0.0266075	-0.003005	0.00977	-0.0169675	0.304414	-0.0395612	0.016515	0.0364638	0.0932338	0.0404125	0.199229	0.0767238	-0.00345	0.111552	-0.123171	-0.118987	-0.152055	0.180369	-0.0186287
YBR078W	ECM33	GPI-anchored protein of unknown function; possible role in apical bud growth; GPI-anchoring on the plasma membrane crucial to function; phosphorylated in mitochondria; similar to Sps2p; ECM33 has a paralog, PST1, that arose from the whole genome duplication	0.045415		-0.0171962	-0.028085		0.01048	0.0685	-0.011845	0.0006	0.0324	0.023405	0.0433125	-0.0122	0.0688625	0.0704225	0.0124875	0.0744675	0.0645425	-0.0834975	0.0480675	-0.1018	-0.038495	-0.040935
YBR079C	RPG1	eIF3a subunit of the eukaryotic translation initiation factor 3 (eIF3); subunit of the core complex of eIF3; essential for translation; part of a Prt1p-Rpg1p-Nip1p subcomplex that stimulates binding of mRNA and tRNA(i)Met to ribosomes; involved in translation reinitiation; eIF3 is also involved in programmed stop codon readthrough	-0.05417	0.474085	-0.0015875	-0.0006575	0.00453	-0.0324313	0.0824375	-0.00763	0.0250225	0.0417788	-0.0457613	0.232568	0.0275838	-0.08477	-0.707469	-0.118699	0.0298162	0.0963163	-0.0294288	-0.0930037	0.021795	0.0817762	0.06432	-0.0214125	0.189241	0.164346	0.322686	0.0379575
YBR080C	SEC18	AAA ATPase and SNARE disassembly chaperone; required for vesicular transport between ER and Golgi, the 'priming' step in homotypic vacuole fusion, autophagy, and protein secretion; releases Sec17p from SNAP complexes; has similarity to mammalian N-ethylmaleimide-sensitive factor (NSF)	0.332376	0.465	0.177774	-0.130041	1.24141	0.115495	0.199314	-0.167057	-0.0724913	-0.109978	0.16146		1.24336		0.36708	1.03926	0.229907	0.400534	1.20205	1.06812	-0.0170213			0.311912	1.53997	-0.201178	0.296401	0.866291
YBR081C	SPT7	Subunit of the SAGA transcriptional regulatory complex; involved in proper assembly of the complex; also present as a C-terminally truncated form in the SLIK/SALSA transcriptional regulatory complex	-0.028725	-0.136355	0.0104275	-0.06555	1.22202	0.0163725	0.293069	0.173726	0.0797488	-0.0607675	0.0242112	-0.04037	0.0132438	0.246535	0.0548025	0.0616575	-0.009455	0.0427575	0.347567	0.485803	-0.0371175	0.155101	-0.098685	-0.0846488	0.132659	-0.0841062	-0.0027875	-0.0228488
YBR082C	UBC4	Ubiquitin-conjugating enzyme (E2); key E2 partner with Ubc1p for the anaphase-promoting complex (APC); mediates degradation of abnormal or excess proteins, including calmodulin and histone H3; regulates levels of DNA Polymerase-{alpha} to promote efficient and accurate DNA replication; interacts with many SCF ubiquitin protein ligases; component of the cellular stress response; UBC4 has a paralog…	-0.0694325	0.431765	0.15662	0.0647563	-0.108183	-0.013095	-0.0368238	0.16591	0.0067025	0.19058	-0.027105	0.125007	-0.02659	-0.1927	-0.11369	-0.0346775	-0.317945	-0.0045875	0.00539	0.0061475	-0.0417525	-0.0451625	-0.04215	-0.0993675	0.000865	0.0578875	-0.019845	-0.0438725
YBR083W	TEC1	Transcription factor targeting filamentation genes and Ty1 expression; Ste12p activation of most filamentation gene promoters depends on Tec1p and Tec1p transcriptional activity is dependent on its association with Ste12p; binds to TCS elements upstream of filamentation genes, which are regulated by Tec1p/Ste12p/Dig1p complex; competes with Dig2p for binding to Ste12p/Dig1p; positive regulator of…	-0.0285362	0.0771338	0.0965325	-0.05823	0.12595	-0.0200575	0.08882	-0.0790025	0.00512625	0.092805	0.0402975	0.0392675	0.033345	0.0329288	0.0508	0.00365375	-0.0552612	0.0406912	0.0079125	-0.08141	-0.0082675	-0.01914	0.0176325	-0.0081925	-0.115739	0.0331738	-0.0558387	-0.119996
YBR084C-A	RPL19A	Ribosomal 60S subunit protein L19A; rpl19a and rpl19b single null mutations result in slow growth, while the double null mutation is lethal; homologous to mammalian ribosomal protein L19, no bacterial homolog; RPL19A has a paralog, RPL19B, that arose from the whole genome duplication	-0.109161	0.152275	-0.0606512	0.107649	-0.115125	0.010805	0.18978	0.0438262	0.0108912	-0.0398838	-0.107045	-0.050055	-0.0699287	0.00132375	0.0036375	-0.0303887	-0.105894	0.0172775	0.0487188	-0.0195563	0.0629675	-0.0088225	0.0413325	-0.121033	-0.184885	-0.02108	0.02128	-0.073375
YBR084W	MIS1	Mitochondrial C1-tetrahydrofolate synthase; involved in interconversion between different oxidation states of tetrahydrofolate (THF); provides activities of formyl-THF synthetase, methenyl-THF cyclohydrolase, and methylene-THF dehydrogenase	0.0844738	0.095195	-0.11259	-0.0022425	-0.100334	0.0226137	0.0703638	-0.01555	-0.0648813	-0.0420387	-0.01027	-0.0694862	0.0725538	-0.117998	0.316126	0.0974663	-0.20742	0.00036	0.0481225	-0.038155	0.01167	-0.0322238	-0.0228513	-0.209611	-0.0042875	0.00991125	-0.0909287	0.0572862
YBR085W	AAC3	Mitochondrial inner membrane ADP/ATP translocator; exchanges cytosolic ADP for mitochondrially synthesized ATP; expressed under anaerobic conditions; similar to Aac1p; has roles in maintenance of viability and in respiration; AAC3 has a paralog, PET9, that arose from the whole genome duplication	-0.0092225	0.07289	-0.02036	-0.024975	-0.0170987	-0.029255	-0.108823	0.0402163	-0.133386	-0.0598638	0.0600525	-0.0299175	-0.017795	-0.06873	0.0120062	0.0428012	0.039075	0.0062425	-0.0715988	0.245072	0.0129775	-0.05643	-0.02814	-0.186331	-0.128626	-0.133472	-0.155669	-0.0623825
YBR086C	IST2	Cortical ER protein involved in ER-plasma membrane tethering; one of 6 proteins (Ist2p, Scs2p, Scs22p, Tcb1p, Tcb2p, Tcb3p) that connect ER to the plasma membrane (PM) and regulate PM phosphatidylinositol-4-phosphate (PI4P) levels by controlling access of Sac1p phosphatase to its substrate PI4P in the PM; localizes to the mother cell in small-budded cells and to the bud in medium- and large-budde…	-0.0486588	0.0595075	0.0227462	0.0349462	0.0774325	-0.0004825	-0.0324312	-0.11752	0.00075375	0.0721675	0.0497125	-0.07238	0.0171962	-0.065975	0.02966	-0.00546875	-0.0029975	0.0118237	0.073285	-0.0203012	-0.00569875	-0.0050975	0.0597275	-0.271746	0.0065175	0.0240725	0.111274	0.103606
YBR087W	RFC5	Subunit of heteropentameric Replication factor C (RF-C); RF-C is a DNA binding protein and ATPase that acts as a clamp loader of the proliferating cell nuclear antigen (PCNA) processivity factor for DNA polymerases delta and epsilon	-0.01096	0.0678663	0.210206	0.124777	2.03242	0.384205	-0.11177	0.619586	0.104865	-0.0589988	0.0298463	0.0467838	-0.266835	0.0745375	-0.0526587	-0.0126675	-0.0481313	0.0522125	0.0987188	0.831913	-0.0341262	-0.00865625	-0.0507162	0.161954	-0.117425	0.110704	-0.105057	-0.00579938
YBR088C	POL30	Proliferating cell nuclear antigen (PCNA); functions as the sliding replication clamp for DNA polymerase delta; may function as a docking site for other proteins required for mitotic and meiotic chromosomal DNA replication and for DNA repair; PCNA ubiquitination at K164 plays a crucial role during Okazaki fragment processing	-0.0973887	-0.115432	-0.123295	-0.0644375	-0.0525687	-0.0481	0.0580925	-0.0242	-0.0867475	-0.0323175	-0.0922213	-0.04289	0.0195188	-0.0174575	-0.0350175	-0.04176	0.0728375	0.0589025	-0.206542	-0.11921	-0.0728125	-0.0494988	-0.0322225	0.852741	1.46907	0.0686337	0.29337	0.725576
YBR089C-A	NHP6B	High-mobility group (HMG) protein; binds to and remodels nucleosomes; involved in recruiting FACT and other chromatin remodelling complexes to the chromosomes; functionally redundant with Nhp6Ap; required for transcriptional initiation fidelity of some tRNA genes; homologous to mammalian HMGB1 and HMGB2; NHP6B has a paralog, NHP6A, that arose from the whole genome duplication	-0.106795	0.0581313	0.152225	-0.0109263	0.195466	-0.0092775	0.0250775	-0.219081	0.198712	-0.03722	-0.00359	0.052215	-0.0234825	0.00067	0.0002125	0.0318138	-0.0146275	-0.0184175	0.0285225	-0.0156275	-0.06501	0.0317025	0.03637	0.0265425	0.004245	-0.0404062	0.0662838	-0.0948
YBR090C		Putative protein of unknown function; green fluorescent protein (GFP)-fusion protein localizes to the cytoplasm and nucleus	-0.0973012	-0.0277575	-0.213221	0.0369037	0.0489	0.00891125	-0.116569	-0.216589	-0.167761	-0.0651762	0.0330138	-0.0234975	-0.0679238	0.0192275	-0.0744525	-0.0193012	-0.140211	0.0350987	-0.0688187	-0.0268537	0.12275	0.0023575	-0.00622875	0.09658	0.0879212	-0.191812	0.0469625	0.0739587
YBR092C	PHO3	Constitutively expressed acid phosphatase similar to Pho5p; brought to the cell surface by transport vesicles; hydrolyzes thiamin phosphates in the periplasmic space, increasing cellular thiamin uptake; expression is repressed by thiamin	-0.283606	0.028955	-0.00983375	-0.03515	0.0388	-0.0117225	-0.09403	-0.0657387	0.0123362	0.028565	-0.0095825	0.01469	-0.0772913	0.0100962	0.0248262	-0.0048	-0.0368762	-0.0089925	-0.150721	-0.0087325	0.010255	-0.00430875	0.0317837	-0.11169	-0.0494475	-0.11735	-0.007045	-0.020095
YBR093C	PHO5	Repressible acid phosphatase; 1 of 3 repressible acid phosphatases that also mediates extracellular nucleotide-derived phosphate hydrolysis; secretory pathway derived cell surface glycoprotein; induced by phosphate starvation and coordinately regulated by PHO4 and PHO2	-0.0581475	0	-0.074135	0.127225	0.00278125	0.0077125	0.017165	-0.0533525	0.0222262	-0.104726	-0.0136712	-0.0203088	0.047725	0.117638	0.080815	-0.03368	0.0970738	-0.0231775	-0.05601	-0.000765	-0.01333	-0.0466325	0.0007625	-0.607698	0.0943875	-0.177025	-0.010605	0.184876
YBR094W	PBY1	Putative tubulin tyrosine ligase associated with P-bodies; may have a role in mRNA metabolism; yeast knockout collection strain identified as a pby1 null mutant is actually wild-type for PBY1 and deleted for mms4	-0.084165	-0.159254	0.102426	0.00758375	-0.163536	-2.375e-05	0.0062825	0.114071	0.077965	0.0596225	0.00485375	-0.00825125	0.0378812	-0.0340263	-0.0303313	-0.18118	-0.0261125	-0.0565263	-0.0497175	-0.0489775	-0.000825	-0.0604125	-0.0318363	-0.104336	0.0829425	-0.0310437	-0.0847412	0.00204125
YBR095C	RXT2	Component of the histone deacetylase Rpd3L complex; possibly involved in cell fusion and invasive growth; relocalizes to the cytosol in response to hypoxia	-0.228568	0.0329175	-0.01033	0.0210975	0.47516	0.23894	0.392188	0.124061	-0.106802	-0.039775	-0.0737875	0.0535225	-0.0564275	0.183768	-0.169875	-0.0602287	-0.126385	0.0208225	-0.058925	-0.0198825	-0.0943275	0.066195	0.044785	-0.104236	0.00110375	-0.00451375	-0.0362338	-0.113934
YBR096W		Putative protein of unknown function; green fluorescent protein (GFP)-fusion protein localizes to the ER	-0.0342763	0.02577	0.0205887	0.051335	0.0562975	0.04801	-0.0711138	0.0432688	0.0918525	0.0395462	-0.0365087	-0.0222938	-0.0932137	-0.042725	0.0156125	-0.025035	0.02459	-3.375e-05	-0.0467163	0.023155	-0.0593788	-0.004235	-0.0161225	-0.0383525	0.568256	0.0811013	0.39218	0.105769
YBR097W	VPS15	Serine/threonine protein kinase involved in vacuolar protein sorting; functions as a membrane-associated complex with Vps34p; active form recruits Vps34p to the Golgi membrane; interacts with the GDP-bound form of Gpa1p; myristoylated; a fraction is localized, with Vps34p, to nuclear pores at nucleus-vacuole junctions and may facilitate transcription elongation for genes positioned at the nuclear…	-0.0014625	-0.0089875	0.03059	0.0156675	-0.0280663	0.0642737	-0.0132012	0.0434763	-0.0589988	-0.0213675	-0.0594125	-0.0734512	-0.406236	0.00986875	0.0092375	-0.00711875	0.0273175	0.0624162	0.0477275	0.0698825	-0.0894463	-0.0412775	0.0734187	-0.018345	0.0432138	-0.0966775	-0.00050125	-0.0147113
YBR098W	MMS4	Subunit of structure-specific Mms4p-Mus81p endonuclease; cleaves branched DNA; involved in recombination, DNA repair, and joint molecule formation/resolution during meiotic recombination; phosphorylation of the non-catalytic subunit Mms4p by Cdc28p and Cdc5p during mitotic cell cycle activates the function of Mms4p-Mus81p	0.100525	-0.0213925	0.020995	-0.0329525	0.03359	-0.00118	0.108982	-0.00274875	-0.02538	-0.01936	-0.00583	0.00655	-0.0286125	-0.0503	0.00474	-0.0004575	-0.124325	-0.0128675	-0.01273	-0.0201463	0.0058625	-0.0602525	-0.0769725
YBR098W	MMS4	Subunit of structure-specific Mms4p-Mus81p endonuclease; cleaves branched DNA; involved in recombination, DNA repair, and joint molecule formation/resolution during meiotic recombination; phosphorylation of the non-catalytic subunit Mms4p by Cdc28p and Cdc5p during mitotic cell cycle activates the function of Mms4p-Mus81p	0.100525	-0.0213925	0.020995	-0.0329525	0.03359	-0.00118	0.108982	-0.00274875	-0.02538	-0.01936	-0.00583	0.00655	-0.0286125	-0.0503	0.00474	-0.0004575	-0.124325	-0.0128675	-0.01273	-0.0201463	0.0058625	-0.0602525	-0.0769725
YBR099C		Dubious open reading frame; unlikely to encode a functional protein, based on available experimental and comparative sequence data; completely overlaps the verified gene MMS4	-0.0110762	-0.137085	0.03068	0.0213175	-0.179259	-0.0588875	0.0471725	-0.201231	0.0718975	-0.00266375	0.01264	0.072425	-0.0367375	-0.047	0.0124125	-0.078175	-0.107211	-0.0327875	0.031945	0.037625	-0.0118625	-0.0793325	-0.017275
YBR101C	FES1	Hsp70 (Ssa1p) nucleotide exchange factor; required for the release of misfolded proteins from the Hsp70 system to the Ub-proteasome machinery for destruction; cytosolic homolog of Sil1p, which is the nucleotide exchange factor for BiP (Kar2p) in the endoplasmic reticulum; protein abundance increases in response to DNA replication stress	-0.0839037	0.0362625	-0.01466	-0.0230713	-0.11616	-0.0414363	0.04609	-0.071825	-0.0570062	-0.144724	-0.044635	-0.0530962	-0.004205	-0.0352175	0.01996	0.032645	-0.0183388	-0.072155	0.00085875	-0.020915	0.0106563	-0.0332912	0.0139937	-0.386207	-0.0069475	-0.0870275	-0.135577	-0.0891113
YBR102C	EXO84	Exocyst subunit with dual roles in exocytosis and spliceosome assembly; subunit of the the exocyst complex which mediates polarized targeting and tethering of post-Golgi secretory vesicles to active sites of exocytosis at the plasma membrane (PM) prior to SNARE-mediated fusion; required for exocyst assembly and targeting the complex to specific sites on the bud tip PM; associates the U1 snRNP; ro…	-0.204764	0.102267	-0.012285	0.0042175	0.208425	-0.0592838	-0.071375	0.208221	-0.216466	0.049605	0.037415	1.45598	0.02598	0.169496	-0.328075	-0.481857	0.066035	0.0735662	-0.08394	1.39491	0.0010575	0.6563	-0.110509	-0.0207375	-0.0556875	-0.00104	0.24392	0.0369737
YBR103C-A		Dubious open reading frame; unlikely to encode a functional protein, based on available experimental and comparative sequence data; identified by homology to related yeast	0.012575	-0.0497125	-0.130145	0	-0.0771025	0.03149	0.259605	0.035955	0.04757	0.00149625	-0.0046275	0.153095	0.094115	0.07801	-0.0215675	-0.0314	0.115918	-0.08931	0.089585	-0.0142138	-0.0071025	0.006965	-0.0237775
YBR103W	SIF2	WD40 repeat-containing subunit of Set3C histone deacetylase complex; complex represses early/middle sporulation genes; antagonizes telomeric silencing; binds specifically to the Sir4p N-terminus	0.63336	-0.02136	0.293921	0.0016675	-0.0946363	0.348372	0.160082	0.0561588	-0.0920587	0.423204	0.05411	0.552059	0.0869	0.0206712	-0.0996688	0.0986838	-0.167307	0.456494	0.0956663	0.130899	0.103472	0.146292	0.142541	0.12765	-0.0592775	0.0192825	0.256962	0.05513
YBR104W	YMC2	Putative mitochondrial inner membrane transporter; proposed role in oleate metabolism and glutamate biosynthesis; member of the mitochondrial carrier (MCF) family; YMC2 has a paralog, YMC1, that arose from the whole genome duplication	-0.036315	-0.07811	-0.107128	-0.07973	0.0970175	-0.0119238	0.100146	0.0677013	0.163876	-0.051375	-0.0195787	0.048795	-0.0435762	0.0571212	-0.01158	0.002705	0.0771625	-0.0568738	0.146459	-0.0858013	-0.0880375	0.0484075	-0.0874262	-0.0241925	-0.475036	0.0363162	-0.266431	-0.0005525
YBR105C	VID24	GID Complex regulatory subunit; binds GID Complex in response to glucose through interactions with complex member Vid28p; regulates fructose-1,6-bisphosphatase (FBPase) targeting to the vacuole; promotes proteasome-dependent catabolite degradation of FBPase; peripheral membrane protein located at Vid (vacuole import and degradation) vesicles	0.0321825	-0.0984	-0.0509688	-0.0472125	0.029995	-0.020345	0.120637	-0.08106	0.043475	0.010975	-0.0092475	-0.019215	0.002735	0.016645	-0.026115	-0.0451375	0.0274	0.06417	-0.098115	-0.0382525	0.09742	0.0218775	-0.006885	0.129214	0.144483	0.307661	0.153985	0.246695
YBR106W	PHO88	Protein involved in SRP-independent targeting of substrates to the ER; component of an alternative ER targeting pathway that has partial functional redundancy with the GET pathway; preference for substrates with downstream transmembrane domains; interacts with Snd1p, Env10p/Snd2p, and Sec61p-translocon subunits; can compensate for loss of SRP; role in phosphate transport, interacting with pho88, …	-0.0371413	-0.0686338	0.0425113	0.00591125	-0.014115	0.013005	0.00314	-0.0334038	-0.0514312	0.137736	-0.0083575	0.0583687	0.02111	-0.045635	0.0279725	0.0177937	0.0429275	-0.0205838	0.145585	-0.0470175	-0.0031775	0.0139	-0.0036925	0.229281	1.41075	0.310057	0.503676	0.361642
YBR107C	IML3	Outer kinetochore protein and component of the Ctf19 complex; involved in the establishment of pericentromeric cohesion during mitosis; prevents non-disjunction of sister chromatids during meiosis II; forms a stable complex with Chl4p; required for localization of Sgo1p to pericentric sites during meiosis I; orthologous to human centromere constitutive-associated network (CCAN) subunit CENP-L and…	0.06123	0.024065	0.0745813	0.0220125	0.180482	0.0497312	-0.002735	-0.0769825	0.105244	0.204516	-0.0443388	0.0039525	-0.0948275	0.129146	0.0285038	0.007515	0.0609338	0.0970912	0.08068	0.023925	0.166629	0.0380788	0.13289	-0.00429375	-0.066275	0.0445762	0.0005375	0.0157037
YBR108W	AIM3	Protein that inhibits barbed-end actin filament elongation; interacts with Rvs167p; null mutant is viable and displays elevated frequency of mitochondrial genome loss	0.05061	-0.0129525	-0.0957625	0.0266975	-0.106468	0.00591375	0.2297	0.06897	0.0127875	0.0433463	-0.0285562	0.020545	0.0216812	-0.0382625	-0.0178862	0.0143187	0.0142188	-0.0145763	0.195121	0.00416125	0.0466975	-0.00080125	0.05072
YBR109C	CMD1	Calmodulin; Ca2+ binding protein that regulates Ca2+ independent processes (mitosis, bud growth, actin organization, endocytosis, etc.) and Ca2+ dependent processes (stress-activated pathways), targets include Nuf1p, Myo2p and calcineurin; binds to the Hog1p MAPK in response to hyperosmotic stress; potentiates membrane tubulation and constriction mediated by the Rvs161p-Rvs167p complex; human CAL…	0.0708125	0.453275	-0.196095	-0.0159675	0.227909	-0.00019125	-0.112102	0.101111	-0.0197363	-0.0737063	-0.0637038	-0.0244362	-0.062495	0.0830425	-0.005895	-0.116446	0.106385	0.0677225	-0.07965	-0.00510375	0.135919	0.0126888	-0.01389	0.43576	0.26359	0.045245	-0.172428	-0.112235
YBR110W	ALG1	Mannosyltransferase; involved in asparagine-linked glycosylation in the endoplasmic reticulum (ER); essential for viability; human homolog ALG1 complements yeast null mutant	0.0355787	-0.0472287	0.129681	-0.00334625	0.0506425	-0.0343188	-0.0412425	0.00402	-0.07243	0.10914	0.0256287	-0.0284413	0.0749237	-0.019885	-0.0290513	-0.00104125	-0.00563	-0.08145	-0.0774212	0.0011875	-0.028275	-0.0599175	-0.124438	-0.0573487	0.540359	-0.194881	0.778224	0.0148413
YBR111C	YSA1	Nudix hydrolase family member with ADP-ribose pyrophosphatase activity; shown to metabolize O-acetyl-ADP-ribose to AMP and acetylated ribose 5'-phosphate	0.065515	1.12805	0.00998625	-0.0001625		-0.0035375	-0.0521225	0.00068875	0.153863	-0.00616625	0.0919275	0.037335	-0.125397	-0.02079	0.04415	-0.0287125	0.0499025	0.030495	-0.143071	0.03883	0.031465	-0.03405	0.0253325	0.176217	0.00808125	-0.00758375	-0.018715	-0.0997862
YBR112C	CYC8	General transcriptional co-repressor; acts together with Tup1p; also acts as part of a transcriptional co-activator complex that recruits the SWI/SNF and SAGA complexes to promoters; can form the prion [OCT+]	-0.110026	0.144978	-0.04933	0.637899	2.3291	0.0346425	0.0314388	0.406719	0.180053	0.101235	-0.007155	-0.0563362	1.28884	0.0238225	0.206544	-0.0915813	0.127979	-0.167962	-0.215539	0.317209	0.0696863	-0.0336	-0.0687575	0.308765	-0.0410613	0.0517375	0.0262325	0.0048125
YBR113W		Dubious open reading frame; unlikely to encode a functional protein, based on available experimental and comparative sequence data; partially overlaps the verified gene CYC8	0.610112	-0.484598	-0.256825	0.116704	-0.64514	0.00276	0.0850825	-0.120381	-0.18391	-0.108317	-0.157539	-0.0190687	-0.0196675	-0.05391	-0.341075	-0.151207	0.105625	-0.0253013	-0.081875	-0.0573425	-0.370666
YBR114W	RAD16	Nucleotide excision repair (NER) protein; binds damaged DNA during NER; binds DNA in an ATP-dependent manner (with Rad7p) during NER; required for NER of non-transcribed chromatin; subunit of Nucleotide Excision Repair Factor 4 (NEF4) and the Elongin-Cullin-Socs (ECS) ligase complex	-0.0118575	-0.026005	-0.0569713	0.0288525	-0.04489	-0.00221625	0.0209088	-0.00137875	0.01488	-0.09542	0.0113837	-0.0493813	0.025515	0.0030975	0.0230625	0.0120187	-0.00039	0.0357125	-0.0192	-0.033215	-0.0318825	-0.0652413	-0.0343888	0.0199975	-0.0052175	0.004475	0.0230325	-0.147152
YBR115C	LYS2	Alpha aminoadipate reductase; catalyzes the reduction of alpha-aminoadipate to alpha-aminoadipate 6-semialdehyde, which is the fifth step in biosynthesis of lysine; activation requires posttranslational phosphopantetheinylation by Lys5p	-0.0711813	-0.003995	-0.00812375	0.0533337	0.0064375	-0.024655	-0.0647563	-0.0700925	-0.0399087	0.048285	-0.0600637	-0.0105425	0.00349125	-0.024895	-0.0622225	-0.0384425	-0.0179575	-0.0198025	-0.009095	-0.039265	-0.0141862	-0.0593163	-0.0402363	-0.0249425	0.0113325	-0.132589	0.0477137	0.0214363
YBR116C		Dubious open reading frame; unlikely to encode a functional protein, based on available experimental and comparative sequence data; partially overlaps the verified gene TKL2	0.03728	-0.03032	0.0173762	-0.013755	-0.003125	-0.00725125	-0.00823125	0.016965	0.0775887	-0.0994812	0.0394388	-0.076815	-0.0228012	0.00704125	0.135098	0.0867925	-0.0387725	-0.0518862	-0.0309075	-0.06073	0.03635	0.0211413	-0.015835
YBR117C	TKL2	Transketolase; catalyzes conversion of xylulose-5-phosphate and ribose-5-phosphate to sedoheptulose-7-phosphate and glyceraldehyde-3-phosphate in the pentose phosphate pathway; needed for synthesis of aromatic amino acids; TKL2 has a paralog, TKL1, that arose from the whole genome duplication	0.00024875	-0.801447	-0.132975	0.06421	-0.35964	0.00693	0.290467	-0.060675	-0.0851275	-0.03922	-0.102235	-0.0890775	-0.0242375	0.01223	0.062275	0.0225187	-0.217359	-0.02083	0.0106237	-0.0109875	-0.22164	0.0030375	-0.10436	-0.141876	-0.0643838	0.0173888	-0.0967575	0.00014375
YBR118W	TEF2	Translational elongation factor EF-1 alpha; in the GTP-bound active form, binds to and delivers aminoacylated tRNA to the A-site of ribosomes for elongation of nascent polypeptides; associates with vacuolar Rho1p GTPase; TEF2-RFP levels increase during replicative aging; may also have a role in tRNA re-export from the nucleus; TEF2 has a paralog, TEF1, that arose from the whole genome duplication	-0.0455425	0.0170975	-0.013975	-0.0755925	0.0808	-0.004465	0.253456	-0.06437	-0.0012175	-0.120493	0.0437912	-0.0257425	-0.058005	-0.0156325	-0.173808	0.0796775	-0.11798	-0.101568	-0.0642725	-0.0005875	0.022045	-0.059825	0.01407	0.01949	0.287559	0.0181288	0.0122088	0.178224
YBR120C	CBP6	Mitochondrial protein required for translation of the COB mRNA; forms a complex with Cbp3p that binds to mt ribosomes near the polypeptide tunnel exit and promotes efficient translation of the COB mRNA; Cbp3p-Cbp6p complex also interacts with newly synthesized cytochrome b (Cobp) and Cbp4p to promote assembly of Cobp into the cytochrome bc1 complex; Cbp3p-Cbp6p complex is sequestered if assembly …	-0.018545	0.05109	-0.055785	-0.0364325	0.022165	-0.0291675	-0.0193925	0.00551	0.115345	-0.0309775	-0.0025425	-0.0116325	0.0176187	0.00284	0.0550725	0.043745	0.0249325	-0.02786	-0.00305	-0.01301	-0.00767	0.018865	-0.005645	-0.10936	-0.0560875	-0.0288675	-0.03308	0.006355
YBR121C	GRS1	Cytoplasmic and mitochondrial glycyl-tRNA synthase; ligates glycine to the cognate anticodon-bearing tRNA; transcription termination factor that may interact with the 3'-end of pre-mRNA to promote 3'-end formation; GRS1 has a paralog, GRS2, that arose from the whole genome duplication; human homolog GARS implicated in Charcot-Marie-Tooth disease, can complement yeast null mutant	-0.0659887	-0.253251	0.215256	-0.124939	0.114513	-0.00531	0.0125625	-0.0537925	-0.083755	0.018495	0.0541025	-0.0389425	0.0249575	-0.03336	0.0640338	0.12605	0.058475	-0.0330063	-0.0237988	-0.035925	-0.168283	-0.011855	-0.112492	0.119496	0.148411	0.0622062	0.0297975	-0.064895
YBR122C	MRPL36	Mitochondrial ribosomal protein of the large subunit; overproduction suppresses mutations in the COX2 leader peptide-encoding region	-0.00353625	-0.0689963	0.006255	0.00212	-0.0080625	0.000315	0.06858	0.134854	-0.0708162	0.0190375	-0.0184037	-0.0149287	-0.0204925	0.0260725	0.07307	-0.032725	0.029745	-0.0442012	-0.0368563	0.0240512	-0.0386662	-0.0144675	-0.016295	0.15787	0.0374025	-0.318969	0.0617313	0.00746625
YBR123C	TFC1	Subunit of RNA polymerase III transcription initiation factor complex; one of six subunits of the RNA polymerase III transcription initiation factor complex (TFIIIC); part of the TauA globular domain of TFIIIC that binds DNA at the BoxA promoter sites of tRNA and similar genes; human homolog is TFIIIC-63	-0.019745	0.154528	-0.0651487	-0.009595	-0.0151338	0.12091	-0.387064	0.0839375	0.0235338	-0.03068	-0.0330162	-0.122953	0.0908025	0.162548	-0.05064	0.0148662	0.06697	0.0057775	0.41508	0.0927075	-0.167758	0.07993	-0.00568	0.02691	-0.0846975	-0.047125	-0.0713238	-0.0625663
YBR124W		Putative protein of unknown function	-0.0631425	-0.0171725	-0.0089575	0.0172437	0.09159	-0.0383337	-0.0978637	-0.03975	-0.0229512	-0.0547375	0.0369875	-0.0499525	0.018205	0.00306	-0.01257	0.0039025	0.0166188	-0.004195	-0.0760712	0.00704	0.017535	-0.00094375	0.00073
YBR125C	PTC4	Cytoplasmic type 2C protein phosphatase (PP2C); identified as a high-copy number suppressor of cnb1 mpk1 synthetic lethality; overexpression decreases high-osmolarity induced Hog1p phosphorylation and kinase activity	0.0242775	0.0267812	-0.0451063	-0.0859588	-0.0165262	0.00761	0.0213475	-0.0532188	-0.04342	-0.131977	0.057115	0.0215525	0.1085	-0.0557275	0.0262	0.020795	0.0265275	-0.0238975	0.0488763	0.074245	-0.0211425	0.075275	0.065655	-0.28729	-0.0661937	0.049705	-0.02297	0.02282
YBR126C	TPS1	Synthase subunit of trehalose-6-P synthase/phosphatase complex; synthesizes the storage carbohydrate trehalose, which is critically important for survival of long-term desiccation; also found in a monomeric form; expression is induced by the stress response and repressed by the Ras-cAMP pathway; protein abundance increases in response to DNA replication stress and in response to prolonged exposur…	0.0747687	-0.07474	0.04155	-0.0674975	-0.00122	0.0264363	0.0302513	-0.10217	0.0959638	-0.0224525	-0.0264612	0.0998688	0.095765	-0.2542	0.051045	0.101127	-0.165823	0.0403763	0.107489	0.199125	0.0447125	0.00369375	-0.0477175	0.0240675	0.240806	0.0236537	0.119667	0.241766
YBR127C	VMA2	Subunit B of V1 peripheral membrane domain of vacuolar H+-ATPase; electrogenic proton pump found throughout the endomembrane system; contains nucleotide binding sites; also detected in the cytoplasm; protein abundance increases in response to DNA replication stress; human homolog ATP6V1B1, implicated in autosomal-recessive distal renal tubular acidosis (RTA) with sensorineural deafness, complemen…	-0.0274725	0.0596213	0.0154575	-0.0852675	0.07835	-0.0361475	0.0482863	0.02048	-0.0175325	-0.07649	0.0142238	-0.0076825	-0.0407075	0.0891825	0.012185	-0.0085575	0.02511	-0.045855	0.0528337	0.0294075	-0.008555	-0.0732725	0.18751	-0.171526	0.217399	0.0208988	-0.0251475	-0.156213
YBR128C	ATG14	Autophagy-specific subunit of phosphatidylinositol 3-kinase complex I; Atg14p targets complex I to the phagophore assembly site (PAS); required for localizing additional ATG proteins to the PAS; required for overflow degradation of misfolded proteins when ERAD is saturated; homolog of human Barkor; other members are Vps34, Vps15, and Vps30p	0.302169	-0.117249	-0.0803725	0.0852788	0.0304275	-0.140517	0.0088775	-0.0361625	0.095895	-0.110361	0.144309	-0.0501125	0.014585	-0.204429	0.0948775	0.0334825	-0.012605	0.0357688	-0.278041	-0.0484287	0.00666125	-0.113601	-0.009075
YBR129C	OPY1	Protein of unknown function; overproduction blocks cell cycle arrest in the presence of mating pheromone; the authentic, non-tagged protein is detected in highly purified mitochondria in high-throughput studies	-0.0685288	0.0535638	-0.09012	-0.00186375	0.107603	-0.00536	-0.137734	-0.0198938	0.0572138	0.05003	0.0161925	0.00081	0.0556263	-0.0788625	0.0235062	-0.0195587	0.0234413	-0.023235	0.070045	-0.0149025	-0.01538	-0.0200825	-0.0492662	-0.0133425	-0.10931	-0.0390662	0.001925	-0.0238212
YBR130C	SHE3	Protein adaptor between Myo4p and the She2p-mRNA complex; part of the mRNA localization machinery that restricts accumulation of certain proteins to the bud; also required for cortical ER inheritance	-0.170841	0.0446112	-0.05578	0.0367988	-0.07391	-0.0197775	0.31343	-0.00878	-0.00692	-0.022565	-0.012885	0.0834262	0.0988225	0.0650613	0.0094	-0.0313175	-0.0791038	-0.00727875	-0.062335	-0.02461	0.00318875	0.0779	0.0578975	0.631852	0.100572	-0.0741062	0.569543	0.0259538
YBR131W	CCZ1	Subunit of a heterodimeric guanine nucleotide exchange factor (GEF); subunit of the Mon1-Ccz1 GEF complex, which stimulates nucleotide exchange and activation of Ypt7p, a Rab family GTPase involved in membrane tethering and fusion events at the late endosome and vacuole; GEF activity is stimulated by membrane association and anionic phospholipids; involved in localizing Ypt7p to the vacuolar memb…	0.0265237	0.0466675	0.0431975	0.08711	0.286285	0.01968	0.101163	0.0553575	0.00957	-0.064265	0.00311	-0.002445	-0.0310075	0.0109575	-0.019125	0.0588137	0.0143512	0.02852	-0.158266	-0.08697	0.09301	0.0189125	0.02414	-0.0298875	-0.153525	0.007905	-0.131442	0.006745
YBR132C	AGP2	Plasma membrane regulator of polyamine and carnitine transport; has similarity to transporters but lacks transport activity; may act as a sensor that transduces environmental signals; has a positive or negative regulatory effect on transcription of many transporter genes	-0.02038		-0.09781	0.0805437		0.00419	-0.10257	-0.332475	0.0756225	-0.121063	-0.255125	0.009575	-0.0277075	0.016285	-0.01593	-0.073385	0.0130075	0.0365362	-0.226201	-0.08889	0.0021725	0.0637225	0.0199912	0.319431	0.130823	-0.00289375	-0.0939887	-0.137511
YBR133C	HSL7	Protein arginine N-methyltransferase; exhibits septin and Hsl1p-dependent localization to the bud neck in budded cells and periodic Hsl1p-dependent phosphorylation; required with Hsl1p, and Elm1p for the mother-bud neck recruitment, phosphorylation, and degradation of Swe1p; interacts directly with Swe1p; relocalizes away from bud neck upon DNA replication stress; human homolog PRMT5 can compleme…	-0.046025	0.035685	0.032195	-0.02758	-0.221469	-0.05099	-0.169448	0.375937	-9e-05	-0.0805312	-0.0851038	-0.111309	-0.05714	0.0330325	0.0411687	-0.042015	-0.041295	-0.0759688	-0.0465788	-0.125551	0.003015	-0.0281862	-0.0628863	-0.050165	0.073715	0.0511825	-0.0369063	0.0695137
YBR134W		Dubious open reading frame; unlikely to encode a functional protein, based on available experimental and comparative sequence data	-0.115168	0.0118663	0.0042975	0.003025	0.015465	0.04599	-0.042	-0.133013	-0.0842688	-0.02915	0.0383975	0.01799	0.00362	-0.0755125	-0.031535	0.0294363	0.0336525	-0.0131175	0.0218925	-0.008275	-0.00263	-0.03069	0.00355
YBR135W	CKS1	Cyclin-dependent protein kinase regulatory subunit and adaptor; interacts with Cdc28p (aka Cdk1p); required for G1/S and G2/M phase transitions and budding; mediates phosphorylation and degradation of Sic1p; modulates proteolysis of M-phase targets through interactions with the proteasome; role in transcriptional regulation, recruiting proteasomal subunits to target gene promoters; human homologs…	0.0426225	0.366812	0.0398437	-0.0589	0.608513	0.0815525	-0.0629337	0.0437275	0.0207263	0.0736425	0.114663	0.276644	-0.101197	0.366805	0.105358	0.2505	0.0567475	0.249881	0.066185	0.600745	0.17993	0.721257	0.174915	0.794601	1.02531	1.25809	-0.079135	0.232657
YBR136W	MEC1	Genome integrity checkpoint protein and PI kinase superfamily member; Mec1p and Dun1p function in same pathway to regulate dNTP pools and telomere length; signal transducer required for cell cycle arrest and transcriptional responses to damaged or unreplicated DNA; facilitates replication fork progression and regulates P-body formation under replication stress; promotes interhomolog recombination…	-0.426907		0.0011	0.005185		0.093115	0.0765625	-0.119402			-0.139395	-0.272395	-0.31107			-0.403933	-0.225043	-0.43326	0.232185	-0.17737	0.277845	0.471955
YBR137W		Protein with a role in ER delivery of tail-anchored membrane proteins; interacts with Sgt2p; binds to the TRC complex, which inserts proteins into the ER membrane; interacts with Msn5p karyopherin; YBR137W is not an essential gene	0.0178062	-0.0092975	0.0271788	0.05638	-0.0712175	-0.0219075	0.455345	-0.0868337	0.0903788	0.874056	-0.0443887	-0.0240113	-0.136001	-0.0587013	-0.0509737	-0.13043	0.052655	0.215049	-0.196178	-0.154649	0.0133037	0.0903738	0.064195	-0.127925	0.0483975	-0.0413387	0.0162512	0.0126512
YBR138C		Cytoplasmic protein of unknown function; APCC(Cdh1) substrate; potentially phosphorylated by Cdc28p; YBR138C is not an essential gene	0.011565	0.100852	-0.0174487	-0.06047	0.070325	0.0104187	-0.0685063	-0.009355	-0.0323425	-0.0241625	-0.0350937	0.0576075	-0.03488	0.0020825	0.0126175	-0.0135825	-0.001135	-0.017045	-0.0552075	0.0445525	0.0258475	0.01972	0.009845	0.116983	-0.10088	-0.01057	0.052635	-0.181585
YBR139W		Putative serine type carboxypeptidase; role in phytochelatin synthesis; green fluorescent protein (GFP)-fusion protein localizes to the vacuole; expression induced by nitrogen limitation in a GLN3, GAT1-independent manner	0.02891	-0.0540713	-0.0068725	-0.125411	0.103829	-0.01708	-0.0425775	0.03275	0.164905	0.0439475	0.0846463	0.11669	0.12525	-0.083805	0.0780175	-0.0132438	-0.0612275	0.02171	0.065795	0.01026	0.057025	-0.072975	0.018815	0.0117025	0.034845	-0.12742	-0.0286525	0.088565
YBR140C	IRA1	GTPase-activating protein; negatively regulates RAS by converting it from GTP- to the GDP-bound inactive form, required for reducing cAMP levels under nutrient limiting conditions, mediates membrane association of adenylate cyclase; mutations cause catalase T deficiency, defective glycogen synthesis and defective trehalose accumulation; IRA1 has a paralog, IRA2, that arose from the whole genome d…	-0.076915	0.02046	0.10823	-0.0824125	0.456072	-0.0239063	-0.0110525	0.22948	-0.0376425	0.0540087	-0.0320688	-0.01615	-0.0773825	0.215329	0.004535	-0.0705312	0.03136	-0.098775	-0.429595	0.605531	-0.0463375	-0.10515	-0.116754	-0.229258	-0.222414	0.0116375	0.177517	-0.270149
YBR141C	BMT2	Nucleolar S-adenosylmethionine-dependent rRNA methyltransferase; methylates adenine (m1A) of the large subunit (LSU) rRNA at position 2142; belongs to Rossmann fold superfamily; green fluorescent protein (GFP)-fusion protein localizes to the nucleolus; YBR141C is not an essential gene	0.00718	0.155106	0.0406475	0.0255987	0.28031	0.00588	-0.124027	0.0506212	0.0808713	0.10652	-0.003455	-0.062565	0.015315	-0.0548763	0.0012575	0.0251175	-0.0998137	-0.022145	-0.0364475	0.0527388	0.0207962	-0.0546287	0.00985625	-0.0756537	-0.15236	-0.051505	-0.04332	-0.00485375
YBR142W	MAK5	Essential nucleolar protein; putative DEAD-box RNA helicase required for maintenance of M1 dsRNA virus; involved in biogenesis of large (60S) ribosomal subunits	0.0155875	-0.0992512	0.305474	-0.0846537	0.168299	0.0512987	-0.049025	0.115511	0.182033	-0.104853	0.0152963	0.114516	0.0379688	0.407639	-0.0585862	-0.0402875	0.0277325	-0.0139212	0.501315	0.343122	-0.0100825	-0.0184175	0.0740113	0.93812	0.233797	0.533648	0.0704462	0.152105
YBR143C	SUP45	Polypeptide release factor (eRF1) in translation termination; mutant form acts as a recessive omnipotent suppressor; methylated by Mtq2p-Trm112p in ternary complex eRF1-eRF3-GTP; mutation of methylation site confers resistance to zymocin; has a role in cytokinesis through interaction with Mlc1p	-0.146914	0.403109	0.784655	0.246542	0.237898	0.0411238	0.158584	0.438589	0.39266	0.00278625	0.0627937	1.18822	1.86987	0.29554	0.438202	0.246896	2.11033	0.0705225	0.160046	0.43626	-0.0551313	-0.017195	0.0665262		0.294496	-0.173992	0.0431988	-0.15424
YBR144C		Dubious open reading frame; unlikely to encode a functional protein, based on available experimental and comparative sequence data; YBR144C is not an essential gene	-0.04612	0.107357	-0.01635	-0.02533	0.0128375	0.00096	0.04993	-0.43198	-0.0294737	0.019875	0.011515	-0.01264	-0.195213	-0.0249825	-0.00118	0.0202475	0.00079625	-0.069515	-0.18052	0.0529987	-0.110306	-0.043435	-0.0541225
YBR145W	ADH5	Alcohol dehydrogenase isoenzyme V; involved in ethanol production; ADH5 has a paralog, ADH1, that arose from the whole genome duplication	0.0350475	0.00472875	-0.0643575	0.0026575	-0.0178775	-0.0605125	0.117938	-0.0830825	-0.0117138	0.0406813	0.0138275	0.154125	0.080685	0.00426375	-0.0135462	-0.00024125	0.0139	0.0257475	0.0470713	-0.0449875	0.0326375	-0.00363375	-0.051185	-0.127922	-0.0556125	0.107537	0.0142475	-0.0393325
YBR146W	MRPS9	Mitochondrial ribosomal protein of the small subunit	-0.0430938	-0.0554588	-0.005975	-0.0003525	-0.202068	-0.133415	-0.0486375	0.06015	-0.0388725	-0.0257537	0.0744875	0.121438	0.0012675	0.0585875	0.0751337	0.11622	-0.044645	0.311985	-0.0491	-0.209842	-0.167391	0.365715	0.188899
YBR147W	RTC2	Putative vacuolar membrane transporter for cationic amino acids; likely contributes to amino acid homeostasis by exporting cationic amino acids from the vacuole; positive regulation by Lys14p suggests that lysine may be the primary substrate; member of the PQ-loop family, with seven transmembrane domains; similar to mammalian PQLC2 vacuolar transporter; RTC2 has a paralog, YPQ1, that arose from t…	0.0684913	-0.041515	0.013215	0.0674488	0.0298225	-0.0398712	-0.008145	-0.0651825	0.0358788	0.0170763	0.108775	0.0370388	-0.020015	-0.0209075	-0.00019	-0.0081775	-0.0341412	-0.015145	0.00397375	-0.00799	0.122621	0.00329625	0.0532113
YBR148W	YSW1	Protein required for normal prospore membrane formation; interacts with Gip1p, which is the meiosis-specific regulatory subunit of the Glc7p protein phosphatase; expressed specifically in spores and localizes to the prospore membrane; YSW1 has a paralog, SPO21, that arose from the whole genome duplication	0.0492713	-0.0733575	-0.0877912	0.0303938	-0.0840975	-0.0319012	-0.143834	0.166217	-0.105258	0.00603	-0.071285	0.0160075	0.0557075	-0.0901475	0.07747	0.025355	-0.123835	0.0478825	0.015905	-0.047	0.02437	-0.04912	-0.0319075
YBR149W	ARA1	NADP+ dependent arabinose dehydrogenase; involved in carbohydrate metabolism; purified as homodimer; naturally occurs with a N-terminus degradation product	-0.062495	-0.0668413	0.0874662	-0.0502812	-0.0298412	-0.0970788	-0.158287	-0.0268975	0.115632	-0.0172887	-0.0374625	-0.140728	-0.0288263	-0.200794	0.0943925	-0.0424863	-0.002795	-0.0369925	0.114455	0.11104	-0.06793	0.0672675	0.0885725	-0.0918575	0.218032	-0.06895	-0.114615	-0.0097825
YBR150C	TBS1	Protein of unknown function; the authentic, non-tagged protein is detected in highly purified mitochondria in high-throughput studies; TBS1 has a paralog, HAL9, that arose from the whole genome duplication	0.121584	0.00223375	-0.0757525	-0.0503938	0.05391	0.0041575	0.111789	-0.0309225	-0.0338275	-0.0593062	-0.0343863	0.0729438	-0.026255	0.09998	-0.0245975	-0.078495	0.240022	0.284041	-0.00988	-0.06468	-0.0460412	0.03356	-0.0090825		-0.124075	0.0129325	0.233385	-0.204405
YBR151W	APD1	Protein of unknown function; required for normal localization of actin patches and for normal tolerance of sodium ions and hydrogen peroxide; localizes to both cytoplasm and nucleus	-0.0286838	-0.146455	0.0771338	-0.015285	-0.14253	0.0135925	-0.012125	0.0564262	0.00982125	-0.0236475	-0.0049125	-0.04671	-0.0112862	0.0521675	-0.00249375	-0.0101688	0.143567	0.0222275	-0.0427437	0.04368	-0.08267	-0.140724	-0.060645	-0.136793	-0.0657725	0.0879575	-0.121295	-0.0911325
YBR152W	SPP381	mRNA splicing factor, component of U4/U6.U5 tri-snRNP; interacts genetically and physically with Prp38p; relocalizes to the cytosol in response to hypoxia	0.067215	-0.0940763	-0.115995	0.110668	-0.12138	-0.00720375	0.0530012	-0.208317	0.06189	0.01904	0.0583088	0.0302313	0.0477313	0.01401	-0.0518925	0.00455625	0.104337	0.0305563	-0.0576475	-0.0231475	0.0787375	-0.0011975	-0.0307825	-0.070835	-0.042335	0.0024225	-0.00171	-0.0189675
YBR153W	RIB7	Diaminohydroxyphoshoribosylaminopyrimidine deaminase; catalyzes the second step of the riboflavin biosynthesis pathway	0.04087	-0.060165	-0.006395	-0.02196	-0.01384	0.007165	-0.0040475	0.0232963	-0.02263	0.0274637	-0.04982	-0.0023625	0.0292275	-0.0152675	0.058975	0.0126675	-0.07897	0.0364675	0.091345	0.088795	0.01818	0.114053	-0.0003125
YBR155W	CNS1	TPR-containing co-chaperone; binds both Hsp82p (Hsp90) and Ssa1p (Hsp70); stimulates ATPase activity of Ssa1p; ts mutants reduce Hsp82p function, overexpression suppresses phenotypes of HSP82 ts allele and cpr7 deletion; human homolog TTC4 complements yeast cns1 mutant	0.0807887	-0.030035	0.0468512	0.087485	0.025545	0.0133375	-0.0604662	0.0626975	-0.0493138	0.0377325	0.06761	-0.0164737	-0.0201925	0.0015225	-0.0408375	0.02611	0.0101288	0.0723312	0.0404675	0.016935	-0.00684625	-0.0354	0.0219	0.0923412	0.028305	-0.07019	-0.0427312	0.024465
YBR156C	SLI15	Subunit of the conserved chromosomal passenger complex (CPC); complex regulates kinetochore-microtubule attachments, activation of the spindle tension checkpoint, and mitotic spindle disassembly; other complex members are Ipl1p, Bir1p, and Nbl1p	-0.0468988	-0.0325625	-0.08119	-0.0444888	0.109342	0.0175812	0.009215	-0.042005	-0.04837	0.0161263	0.125005	0.0134012	-0.00182	-0.01127	0.0560138	0.102049	0.0588512	0.0133662	-0.0191525	-0.00215875	-0.0265888	0.0743938	-0.0832863	1.58923	1.59072	-0.0166975	0.826935	1.11535
YBR157C	ICS2	Protein of unknown function; null mutation does not confer any obvious defects in growth, spore germination, viability, or carbohydrate utilization	0.0626775	-0.030165	0.121096	0.00580875	-0.108211	-0.0268475	-0.117097	0.118299	-0.001215	0.142445	0.0422187	-0.107185	0.0618075	0.055175	-0.021645	0.023275	0.0209788	-0.0866975	-0.04688	0.0568975	0.038175	-0.08878	0.03452
YBR158W	AMN1	Protein required for daughter cell separation; multiple mitotic checkpoints, and chromosome stability; contains 12 degenerate leucine-rich repeat motifs; expression is induced by the Mitotic Exit Network (MEN)	-0.0211663	0.02158	0.20168	0.0289513	-0.050855	-0.0147525	0.106828	0.0672725	0.0109125	0.046265	-0.003815	-0.0004975	-0.046315	-0.035995	-0.107745	-0.0425475	0.02199	0.0581837	-0.006535	-0.00394125	0.0332488	-0.0129088	0.0242675	-0.171665	-0.120441	-0.0843537	-0.0574362	-0.04755
YBR159W	IFA38	Microsomal beta-keto-reductase; contains oleate response element (ORE) sequence in the promoter region; mutants exhibit reduced VLCFA synthesis, accumulate high levels of dihydrosphingosine, phytosphingosine and medium-chain ceramides	-0.0745325	-0.26006	0.0162937	-0.0013	0.145448	0.0112937	-0.0968912	-0.00553125	-0.119829	0.230703	-0.0291362	-0.10473	0.0324837	-0.0804187	-0.0088025	0.0053475	0.253485	0.0231913	-0.247606	0.116124	-0.155502	-0.0673975	0.0184088	0.248025	1.0391	0.673295	0.58658	0.875037
YBR160W	CDC28	Cyclin-dependent kinase (CDK) catalytic subunit; master regulator of mitotic and meiotic cell cycles; alternately associates with G1, S, G2/M phase cyclins, which provide substrate specificity; regulates metabolism, basal transcription, chromosome dynamics, growth and morphogenesis; transcript induction in osmostress involves antisense RNA; human homologs CDK1, CDK2, CDK3 can complement yeast con…	0.10822	-0.175733	0.190672	0.309101	0.290465	0.1171	-0.15499	0.31197	0.104587	0.09207	0.0226063	0.206998	-0.03527	0.026845	0.77984	0.337543	0.198845	-0.0269812	0.50856	0.55223	0.246885	0.225518	0.0266225	-0.0086675	0.559536	0.747675	-0.114937	-0.27289
YBR161W	CSH1	Mannosylinositol phosphorylceramide (MIPC) synthase catalytic subunit; forms a complex with regulatory subunit Csg2p; function in sphingolipid biosynthesis is overlapping with that of Sur1p; CSH1 has a paralog, SUR1, that arose from the whole genome duplication	-0.108902	0.095915	0.00975125	0.0135425	0.087225	-0.02427	-0.153837	0.00188	-0.02318	-0.00762375	0.00309875	-0.03604	-0.136989	0.01931	0.028575	-0.0020775	-0.135925	-0.0972425	0.0033775	0.007625	0.0046325	0.0288225	0.0342138	-0.129497	-0.0788225	0.117395	-0.0324425	-0.02884
YBR162C	TOS1	Covalently-bound cell wall protein of unknown function; identified as a cell cycle regulated SBF target gene; deletion mutants are highly resistant to treatment with beta-1,3-glucanase; has sequence similarity to YJL171C	0.0312975	-0.12001	-0.210456	0.047175	0.067195	0.0368825	-0.288293	0.27931	-0.0578687	-0.027635	-0.00586875	-0.0514288	-0.030175	-0.0197975	0.111005	0.0332687	0.0100075	0.011415	-0.055905	-0.0945363	-0.0747025	-0.02775	-0.0127963	-0.030735	-0.06819	-0.0561025	-0.0164325	0.04097
YBR162W-A	YSY6	Protein of unknown function; expression suppresses a secretory pathway mutation in E. coli; has similarity to the mammalian RAMP4 protein involved in secretion	-0.0549775	0.0248625	-0.164765	0.0707875	0.14289	0.0334887	0.0193788	-0.387034	0.029725	-0.147641	0.0222175	0.058465	-0.0246262	-0.0341038	0.026115	0.0065125	-0.0146425	-0.124625	0.100501	-0.019405	0.0513487	-0.00598	-0.014645	0.067665	-0.103425	-0.0066925	0.008625	6e-05
YBR163W	EXO5	Mitochondrial 5'-3' exonuclease and sliding exonuclease; required for mitochondrial genome maintenance; distantly related to the RecB nuclease domain of bacterial RecBCD recombinases; may be regulated by the transcription factor Ace2	0.00879625	-0.058625	0.0558238	-0.0123237	-0.0221	-0.0106737	-0.189579	-0.03968	0.0179575	0.014775	0.0297125	-0.02893	0.13446	-0.010895	-0.0481175	-0.0064025	-0.145033	0.0043075	0.011115	-0.0190275	-0.002865	-0.0323425	-0.0056025	-0.0335019	-0.164744	-0.0763075	-0.244529	-0.0145752
YBR164C	ARL1	Soluble GTPase with a role in regulation of membrane traffic; regulates potassium influx; role in membrane organization at trans-Golgi network; required for delivery of Atg9p to the phagophore assembly site during autophagy under high temperature stress; required with Ypt6p for starvation-induced autophagy; required for the CVT pathway under non-starvation conditions; G protein of the Ras superfa…	-0.072445	0.313823	-0.016115	0.0076525	-0.360335	0.0518975	0.0017225	0.119512	0.26464	-0.0863238	-0.0713	-0.04442	-0.0614575	0.015485	0.0718	0.082625	-0.093445	-0.0918325	-0.146427	-0.075765	-0.158784	-0.0527	-0.108985	0.09586	-0.356826	-0.080365	-0.14078	-0.16812
YBR165W	UBS1	Ubiquitin-conjugating enzyme suppressor that regulates Cdc34p; functions as a general positive regulator of Cdc34p activity; nuclear protein that may represent a link between nucleocytoplasmic transport and ubiquitin ligase activity	0.0139913	0.00790875	-0.0333	0.0491125	-0.0570075	0.0576325	0.0193737	-0.00542	-0.0331888	0.06493	0.163384	0.0360512	0.00550125	0.0561238	0.110721	-0.056495	-0.0186275	0.0134612	0.0251375	-0.09016	-0.00398	0.00815625	3.625e-05
YBR166C	TYR1	Prephenate dehydrogenase involved in tyrosine biosynthesis; expression is dependent on phenylalanine levels	0.0604362	0.132395	-0.0605425	0.0107413	0.0078825	-0.0507738	0.170575	-0.305216	0.022365	0.280879	0.0667325	0.0025125	0.0756	-0.110048	-0.12602	-0.100462	0.180346	0.0813775	-0.0962825	-0.00045	0.0449237	0.0291063	0.0171938	-0.308225	0.149136	0.12116	0.00255625	0.067665
YBR167C	POP7	Subunit of RNase MRP, nuclear RNase P and telomerase; forms a soluble heterodimer with Pop6p that binds P3 domain of RNase MRP and RNase P RNAs; RNase MRP cleaves pre-rRNA, nuclear RNase P cleaves tRNA precursors to generate mature 5' ends and facilitates turnover of nuclear RNAs, while telomerase replenishes telomeric DNA	-0.0526775	-0.173666	0.093935	0.120786	0.05911	0.0141275	0.104095	-0.51834	0.109209	0.0837087	-0.08556	0.0842325	-0.01546	0.076905	-0.0831175	0.09406	-0.0678537	0.0553712	0.04784	0.206833	-0.103365	0.0168112	0.0177612	-0.0295963	-0.176703	-0.0500463	-0.0677062	0.134906
YBR168W	PEX32	Peroxisomal integral membrane protein; involved in negative regulation of peroxisome size; partially functionally redundant with Pex31p; genetic interactions suggest action at a step downstream of steps mediated by Pex28p and Pex29p	0.205181	0.004375	0.565565	-0.0158625		0.200871	0.258774	-0.150589	-0.0350787	-0.0609387	-0.0761625	0.219505	-0.172021	0.169599	0.0254375	-0.305683	-0.0536312	0.176843	-0.238789	-0.242047	-0.084555	0.0037425	0.0210875	-0.119157	0.025155	0.0794113	-0.0399788	-0.182996
YBR169C	SSE2	Member of Hsp110 subclass of the heat shock protein 70 (HSP70) family; serves as nucleotide exchange factor to load ATP onto the SSA class of cytosolic Hsp70s; may be involved in protein folding; localized to the cytoplasm; SSE2 has a paralog, SSE1, that arose from the whole genome duplication	-0.01163	-0.191812	0.069635	-0.011435	-0.04411	-0.0071875	0.339056	0.57829	0.00483	0.0251425	0.022545	0.0123888	0.018805	-0.0311925	0.0034625	0.0199275	-0.118895	-0.04057	0.03228	0.0073975	0.101932	0.0023475	0.045275	-0.0625575	0.447703	-0.0043975	0.0185075	0.0370625
YBR170C	NPL4	Substrate-recruiting cofactor of the Cdc48p-Npl4p-Ufd1p segregase; assists Cdc48p in the dislocation of misfolded, polyubiquitinated ERAD substrates that are subsequently delivered to the proteasome for degradation; also involved in the regulated destruction of resident ER membrane proteins, such as HMG-CoA reductase (Hmg1/2p) and cytoplasmic proteins (Fbp1p); role in mobilizing membrane bound tr…	0.0094925	0.0887388	0.286881	-0.0230175	0.21154	-0.01186	0.15854	0.019095	-0.139185	-0.197435	0.03303	0.05996	-0.282615	0.013695	-0.00885	-0.014185	0.0410075	0.096985	-0.295407	-0.053175	-0.119983	-0.0536375	0.06727	0.08656	0.0589363	0.03081	-0.039775	-0.0682862
YBR171W	SEC66	Non-essential subunit of Sec63 complex; with Sec61 complex, Kar2p/BiP and Lhs1p forms a channel competent for SRP-dependent and post-translational SRP-independent protein targeting and import into the ER; other members are Sec63p, Sec62p, and Sec72p	-0.028515	-0.0183087	-0.014735	0.03749	0	-0.084225	-0.01162	0.0332575	0.044345	-0.0665875	-0.0353	-0.0352125	0.037595	0.097495	0.00988	-0.03379	0.0146375	-0.0364525	0.08407	0.0265275	-0.00869375	0.0841825	0.42895	0.677869	0.740585	0.316309	0.335508	-0.111275
YBR172C	SMY2	GYF domain protein; involved in COPII vesicle formation; interacts with the Sec23p/Sec24p subcomplex; overexpression suppresses the temperature sensitivity of a myo2 mutant; similar to S. pombe Mpd2; SMY2 has a paralog, SYH1, that arose from the whole genome duplication	-0.119868	-0.00574875	-0.0730112	0.00284375	-0.037665	-0.03349	0.0633113	-0.03563	-0.0433075	0.0748588	-0.0279	0.151986	0.0666062	0.0647112	0.348502	0.24559	0.0572913	0.074345	0.104618	-0.0728613	-0.102344	0.0122075	0.135825	-0.138437	0.08541	-0.171483	0	0.0552775
YBR173C	UMP1	Chaperone required for correct maturation of the 20S proteasome; short-lived chaperone; may inhibit premature dimerization of proteasome half-mers; degraded by proteasome upon completion of its assembly	-0.0513475	0.0309	-0.0016125	-0.0041325	0.02255	-0.0116963	0.01389	0.136765	-0.0359437	0.00527	0.07646	0.03001	-0.0297938	-0.01462	-0.0208363	0.0151925	-0.00674	0.0020875	-0.0436387	-0.03117	-0.021435	0.0323012	0.00077	0.474285	0.153982	-0.0680125	-0.182185	-0.13497
YBR174C		Dubious open reading frame; unlikely to encode a functional protein, based on available experimental and comparative sequence data; partially overlaps the verified ORF YBR175W; null mutant is viable and sporulation defective	0.0362538	0.088925	-0.02579	0.0786137	-0.01324	0.0354425	0.0341025	-0.281999	-0.0735887	-0.0474513	0.031065	-0.029335	-0.26114	-0.0620762	0.0270288	-0.0226175	-0.00192	-0.059755	-0.54242	0.0903225	-0.234714	-0.090185	-0.0765988
YBR175W	SWD3	Essential subunit of the COMPASS (Set1C) complex; COMPASS methylates histone H3 on lysine 4 and is required in transcriptional silencing near telomeres; WD40 beta propeller superfamily member and ortholog of mammalian WDR5	-0.03169	-0.0052775	0.038785	0.0460863	0.138445	0.154285	0.21218	0.0748975	-0.0684325	-0.0271125	0.00501125	0.12054	0.105612	0.297295	-0.09135	-0.0005525	0.04273	-0.00388125	0.415533	0.25253	0.0276575	0.206395	0.0825025	0.022635	0.00307625	0.106557	-0.106398	-0.02787
YBR176W	ECM31	Ketopantoate hydroxymethyltransferase; required for pantothenic acid biosynthesis, converts 2-oxoisovalerate into 2-dehydropantoate	-0.115951	-0.07909	-0.0623475	0.0733137	-0.137148	-0.01855	0.0223525	0.0690613	-0.00057125	-0.0720062	-0.0500763	0.0500012	0.0179025	-0.00746375	0.00046375	-0.0365412	-0.0340213	0.03193	-0.0369913	-0.0942713	-0.0353062	-0.0272063	0.020145	0.0281038	-0.104447	0.128348	-0.0219925	0.0312975
YBR177C	EHT1	Acyl-coenzymeA:ethanol O-acyltransferase; plays a minor role in medium-chain fatty acid ethyl ester biosynthesis; possesses short-chain esterase activity; localizes to lipid particles and the mitochondrial outer membrane; EHT1 has a paralog, EEB1, that arose from the whole genome duplication	-0.112299	0.089135	-0.0275712	0.175034	-0.0303425	0.0170662	0.121762	-0.303384	-8.75e-05	0.0609087	0.02745	0.02741	0.0341925	0.0401725	-0.128873	-0.06264	0.00734625	-0.0418925	0.104578	-0.034295	0.0494962	-0.0680588	0.00617875	0.025435	1.24785	0.0166088	0.55344	0.243165
YBR178W		Dubious open reading frame; unlikely to encode a functional protein, based on available experimental and comparative sequence data; partially overlaps the verified gene YBR177C	-0.0491775	-0.0676937	-0.01757	0.00147	-0.21125	0.01906	-0.061765	-0.302283	-0.03393	-0.0329687	0.0825113	-0.0004775	-0.00210875	0.01163	-0.009175	0.002415	0.014795	-0.0418975	0.0344412	0.0055925	0.0160925	-0.023935	-0.01578
YBR179C	FZO1	Mitofusin; integral membrane protein involved in mitochondrial outer membrane tethering and fusion; role in mitochondrial genome maintenance; efficient tethering and degradation of Fzo1p requires an intact N-terminal GTPase domain; targeted for destruction by the ubiquitin ligase SCF-Mdm30p and the cytosolic ubiquitin-proteasome system	-0.0184925	0.01047	0.0825775	0.0182675	-0.25854	-0.0006925	0.0127812	0.231161	-0.0184225	-0.0012025	0.027335	0.13424	0.134325	0.35843	-0.0183725	0.0557262	-0.00035375	0.0481825	0.504337	0.358201	-0.0063825	0.118075	0.370745	0.0905062	0.02279	0.487989	0.19541	0.104523
YBR181C	RPS6B	Protein component of the small (40S) ribosomal subunit; homologous to mammalian ribosomal protein S6, no bacterial homolog; phosphorylated on S233 by Ypk3p in a TORC1-dependent manner, and on S232 in a TORC1/2-dependent manner by Ypk1/2/3p; RPS6B has a paralog, RPS6A, that arose from the whole genome duplication	0.078655	0.0598337	0.0370825	-0.0116937	0.0103488	-0.0331975	-0.150826	-0.023685	0.0083525	-0.06091	0.0393462	-0.0322375	-0.171058	0.0272475	0.07345	0.0373525	-0.106561	-0.074315	-0.043505	-0.00798	0.0271325	0.05986	-0.035685	0.62123	-0.08119	-0.0795975	-0.02056	-0.07621
YBR182C	SMP1	MADS-box transcription factor involved in osmotic stress response; SMP1 has a paralog, RLM1, that arose from the whole genome duplication	0.0229412	-0.0671838	0.0327462	-0.012485	-0.0175413	0.0331712	0.10264	0.0221925	-0.024615	0.0484175	-0.0086025	-0.0615612	-0.02482	0.00959375	-0.159719	-0.123869	0.0620525	-0.0239675	-0.0338762	-0.10938	-0.0299675	0.00602375	-0.0483825
YBR183W	YPC1	Alkaline ceramidase; also has reverse (CoA-independent) ceramide synthase activity; catalyzes both breakdown and synthesis of phytoceramide; overexpression confers fumonisin B1 resistance; YPC1 has a paralog, YDC1, that arose from the whole genome duplication	-0.091355	0.151505	-0.0157387	0.0013	-0.03701	-0.0194113	0.116949	0.0345738	0.103244	-0.086285	0.0238187	0.0154025	-0.0460088	-0.0322563	-0.0015025	-0.0275475	0.0366625	-0.0379787	0.0622438	-0.0807713	0.0161625	-0.037065	-0.0126462
YBR184W		Putative protein of unknown function; YBR184W is not an essential gene	0.06344	-0.0212975	-0.0298363	-0.0910487	-0.0909825	-0.0568275	0.13755	0.0013375	0.0560312	0.0671963	-0.00770375	0.11654	-0.03185	-0.065435	-0.045875	0.0212275	-0.078565	0.115685	0.0113225	-0.0621175	0.03238	-0.03589	-0.0177025
YBR185C	MBA1	Membrane-associated mitochondrial ribosome receptor; forms a complex with Mdm38p that may facilitate recruitment of mRNA-specific translational activators to ribosomes; possible role in protein export from the matrix to inner membrane	-0.11897	0.024585	-0.03725	0.0509037	0.0336425	0.0328575	-0.0140375	0.05708	-0.0813212	-0.049625	-0.0060025	-0.0149025	-0.0369437	0.06266	0.0552887	0.039865	0.0641875	0.00068875	0.021015	-0.04055	-0.13975	-0.026225	-0.102956	-0.0125275	-0.072135	-0.07172	-0.113685	-0.13082
YBR186W	PCH2	Hexameric ring ATPase that remodels chromosome axis protein Hop1p; nucleolar component of the pachytene checkpoint, which prevents chromosome segregation when recombination and chromosome synapsis are defective; also represses meiotic interhomolog recombination in rDNA; required for meiotic double-stranded break formation	0.0258525	0.0283675	0.00411	0.029605	-0.161647	0.00234875	-0.0525188	0.0333875	0.0625025	0.0719275	0.0235025	-0.0437625	0.0325675	-0.02035	-0.00692125	-0.02093	-0.0234075	-0.112615	-0.013745	-0.016655	0.022275	0.0259125	-0.0301575
YBR187W	GDT1	Calcium transporter localized to the cis- and medial-Golgi apparatus; required for protein glycosylation; GFP-fusion protein localizes to the vacuole; TMEM165, a human gene which causes Congenital Disorders of Glycosylation is orthologous and functionally complements the null allele; expression pattern and physical interactions suggest a possible role in ribosome biogenesis; expression reduced in…	0.0186975	-0.220312	-0.009905	0.0827013	0.06973	-0.0228075	0.0806362	-0.0202325	0.0116825	-0.123086	-0.0543138	0.0349612	0.0224525	0.01473	-0.032205	0.0011925	-0.0095	-0.00249125	0.0035475	0.0374087	0.0166125	-0.03393	-0.024535	0.373266	-0.0126262	-0.001765	-0.100311	-0.18905
YBR188C	NTC20	Member of the NineTeen Complex (NTC); this complex contains Prp19p and stabilizes U6 snRNA in catalytic forms of the spliceosome containing U2, U5, and U6 snRNAs	0.02422	0.177294	0.043905	-0.0183938	-0.166483	0.0308075	-0.0914	-0.15959	0.0235563	-0.062185	0.0665162	-0.103964	0.0947325	0.001	0.049235	0.0950175	0.04064	0.01713	-0.01333	0.078155	0.0422075	0.0867275	0.186385	-0.0202062	-0.196821	0.111585	-0.230669	-0.129493
YBR189W	RPS9B	Protein component of the small (40S) ribosomal subunit; homologous to mammalian ribosomal protein S9 and bacterial S4; RPS9B has a paralog, RPS9A, that arose from the whole genome duplication	0.276665	-0.397794	-0.046175	-0.0277263		-0.29801	-0.11844	0.0757962	-0.130479	-0.289222	-0.014595	-0.18051	-0.158805	0.176924	-0.418822	-0.178118	0.161049	-0.045765	-0.163878	-0.206959	0.223136	0.188524	0.684381		-0.152248	-0.213138	0.106603	-0.16264
YBR190W		Dubious open reading frame; unlikely to encode a functional protein, based on available experimental and comparative sequence data; partially overlaps the verified ribosomal protein gene RPL21A/YBR191W	-0.04091	0.125067	-0.0167025	0.0407337	-0.0643475	-0.0082775	-0.142444	-0.147384	0.05114	-0.068245	0.0925263	0.030925	-0.0435725	-0.0585925	0.0310638	0.00976875	-0.02175	-0.018025	-0.049625	-0.009445	0.0396625	-0.0270113	-0.0147563
YBR191W	RPL21A	Ribosomal 60S subunit protein L21A; homologous to mammalian ribosomal protein L21, no bacterial homolog; RPL21A has a paralog, RPL21B, that arose from the whole genome duplication	-0.189095	0.553453	0.299605	-0.583263		0.0342825	-0.112396	0.346391	0.149253	0.452934	-0.09954	1.15218	-0.145519	-0.254217	-0.41968	-0.582609	0.180561	-0.175616	-0.03092	-0.403052	0.212033	0.0730637	-0.110811	0.586645		-0.02061	0.225582	0.0718875
YBR193C	MED8	Subunit of the RNA polymerase II mediator complex; associates with core polymerase subunits to form the RNA polymerase II holoenzyme; essential for transcriptional regulation	-0.06413	0.00868125	0.373999	0.117696	0.00566	0.0261575	-0.014035	0.0255612	-0.0488375	-0.08423	0.0132825	-0.0059775	-0.0143125	-0.0057325	-0.0512213	-0.0284212	0.020405	0.001175	-0.0487	-0.072585	-0.0585375	0.0366975	0.0611025	0.307876	0.0391725	-0.19464	-0.483599	-0.299198
YBR194W	AIM4	Protein proposed to be associated with the nuclear pore complex; null mutant is viable, displays elevated frequency of mitochondrial genome loss and is sensitive to freeze-thaw stress	0.03767	-0.039735	0.00561	-0.0226875	-0.0375675	-0.018155	0.017225	-0.0167975	-0.0580012	-0.0858225	0.111271	0.00328	-0.005455	-0.016785	-0.0026375	-0.019345	0.0301475	0.010815	0.0262	-0.002935	0.0031	0.07463	-0.016645	-0.048065	0.0202387	-0.0341725	0.012195	0.0112862
YBR195C	MSI1	Subunit of chromatin assembly factor I (CAF-1); chromatin assembly by CAF-1 affects multiple processes including silencing at telomeres, mating type loci, and rDNA; maintenance of kinetochore structure; deactivation of DNA damage checkpoint after DNA repair; chromatin dynamics during transcription; and repression of divergent noncoding transcription; Msi1p localizes to nucleus and cytoplasm and i…	-0.0647338	-0.0957225	-0.424528	0.00420625	-0.245658	-0.004365	0.10359	0.139497	0.0646462	-0.171398	-0.05324	0.0447625	-0.090105	0.00583875	-0.141047	-0.065085	-0.184573	-0.008285	-0.13409	-0.01566	-0.0563262	-0.0233575	0.04609	-0.01367	-0.0514262	0.04276	-0.0152713	0.008905
YBR196C	PGI1	Glycolytic enzyme phosphoglucose isomerase; catalyzes the interconversion of glucose-6-phosphate and fructose-6-phosphate; required for cell cycle progression and completion of the gluconeogenic events of sporulation	0.029335	-0.293162	0.0011275	-0.131594	0.0856475	-0.0891113	0.193043	-0.047395	-0.00721625	-0.0391	-0.0632362	0.102714	-0.022785	-0.0657675	0.02784	0.0178725	-0.0494	-0.0908125	-0.03082	-0.121275	0.061855	-0.02731	-0.0287713	-0.03359	0.26114	0.010545	-0.06859	-0.140432
YBR197C		Protein of unknown function; green fluorescent protein (GFP)-fusion protein localizes to the cytoplasm and nucleus; YBR197C is not an essential gene; relative distribution to the nucleus increases upon DNA replication stress; YBR197C has a paralog, YPL077C, that arose from the whole genome duplication	-0.0127325	0.126281	-0.0670162	-0.00183375	0.013235	-0.0151512	0.02942	-0.185199	0.0192362	0.030495	-0.0440363	0.010495	-0.0135425	0.00715625	0.0048125	-0.00218	-0.187383	0.0597925	0.042915	-0.0150125	0.031885	-0.025895	-0.0349937	0.11569	0.0328287	-0.0314863	-0.047905	0.059215
YBR198C	TAF5	Subunit (90 kDa) of TFIID and SAGA complexes; involved in RNA polymerase II transcription initiation and in chromatin modification	-0.149423	0.0122162	0.0559838	-0.0875838	0.670275	-0.0550225	0.0170812	0.458253	0.0183075	-0.00071625	-0.0191125	1.18726	0.260119	0.769739	0.0623725	0.0650775	0.298526	-0.0235275	0.860507	0.783839	0.0291087	0.502698	0.189007	-0.114388	-0.147448	-0.0572275	-0.12205	-0.10186
YBR199W	KTR4	Glycosyltransferase involved in protein glycosylation; transfers GDP-mannose to methyl-alpha-mannoside in vitro; member of the KRE2/MNT1 mannosyltransferase family of type II membrane proteins with a short cytoplasmic N-terminus, a membrane-spanning region and a highly conserved catalytic lumenal domain	0.57494	-0.0322025	0.0408912	-0.106599	0.206498	-0.012305	0.0301825	-0.025975	-0.000215	0.108875	-0.0935862	-0.0037275	0.0076625	-0.0330475	-0.0420425	0.019925	0.0090175	0.0518225	-0.124265	0.0339175	0.020645	-0.0905325	-0.07981	-0.148214	0.102916	-0.0724613	-0.0513713	-0.0418463
YBR200W	BEM1	Protein containing SH3-domains; involved in establishing cell polarity and morphogenesis; functions as a scaffold protein for complexes that include Cdc24p, Ste5p, Ste20p, and Rsr1p	-0.14573	0.000815	-0.074695				0.133739	-0.0449625	0.04641	0.032715	0.236871	-0.158659	0.125018	0.23615			0.410737	0.201843		0.253955	0.200793		0.12378	-0.0804325	0.00260375	-0.162104	0.0239112	0.0196475
YBR201W	DER1	ER membrane protein that promotes export of misfolded polypeptides; required for ER-associated protein degradation of misfolded or unassembled proteins; initiates export of aberrant polypeptides from ER lumen by threading them into ER membrane and routing them to Hrd1p for ubiquitination; function normally requires N-terminal acetylation by NatB; N- and C- termini protrude into cytoplasm; similar…	-0.020145	0.0277025	-0.00261125	0.0151225	0.105362	-0.023665	0.0342862	-0.190553	-0.00873125	-0.0366975	-0.00806	-0.01931	0.0148463	-0.0237525	0.0238088	0.0267063	0.0133513	-0.0064225	-0.0351137	-0.0304813	0.018055	0.04845	-0.00519
YBR202W	MCM7	Component of the Mcm2-7 hexameric helicase complex; MCM2-7 primes origins of DNA replication in G1 and becomes an active ATP-dependent helicase that promotes DNA melting and elongation in S-phase; forms an Mcm4p-6p-7p subcomplex	-0.0514613	-0.3664	0.072725	0.06649	0.0241237	0.011265	-0.0665875	-0.0766675	0.00480375	-0.00648125	0.0745062	-0.0202575	0.0643863	-0.0299775	-0.0780738	-0.187339	-0.00593375	0.0006475	-0.161779	-0.0516825	0.0184	-0.157211	0.04433	-0.0647625	-0.0190425	0.12637	0.0454025	0.0776875
YBR203W	COS111	Protein required for antifungal drug ciclopirox olamine resistance; not related to the subtelomerically-encoded COS family; the authentic, non-tagged protein is detected in highly purified mitochondria in high-throughput studies	0.03495	-0.0153725	0.09505	0.100858	-0.112305	0.0228012	-0.371505	0.044035	-0.0159675	-0.0199187	-0.0126462	-0.0802675	-0.150741	0.004705	0.0530038	0.00396125	-0.0132062	-0.0591062	-0.00745875	-0.0555037	-0.0352075	-0.0270312	-0.0397475
YBR204C	LDH1	Serine hydrolase; exhibits active esterase plus weak triacylglycerol lipase activities; proposed role in lipid homeostasis, regulating phospholipid and non-polar lipid levels and required for mobilization of LD-stored lipids; localizes to the lipid droplet (LD) surface; contains a classical serine containing catalytic triad (GxSxG motif)	-0.0466375	0.0933138	-0.196543	0.0578162	0.0604062	-0.01542	-0.111719	-0.169746	-0.03709	0.013495	0.0468237	0.0190875	-0.045655	0.0345725	-0.0363125	-0.0384738	-0.0026675	-0.004955	-0.0761562	-0.191235	-0.0540825	-0.03169	-0.0428975
YBR205W	KTR3	Putative alpha-1,2-mannosyltransferase; involved in O- and N-linked protein glycosylation; member of the KRE2/MNT1 mannosyltransferase family; Svp26p mediates uptake of Ktr3p into COPII vesicles; relocalizes from nucleus to vacuole upon DNA replication stress	-0.0301025	-0.01685	-0.0912112	0.0181588	-0.109065	0.038555	-0.014775	0.0563625	-0.00576	-0.0263025	0.0198263	0.0646125	0.00761	0.0172625	0.0471275	-0.0134175	0.04182	-0.0057125	0.053215	-0.120752	-0.0067525	0.0060925	-0.054845	-0.0788963	-0.281058	-0.200096	-0.0434775	-0.03444
YBR207W	FTH1	Putative high affinity iron transporter; involved in transport of intravacuolar stores of iron; forms complex with Fet5p; expression is regulated by iron; proposed to play indirect role in endocytosis; protein abundance increases in response to DNA replication stress	-0.0579462	-0.0775887	0.0671387	0.0315163	-0.188128	-0.0294062	-0.032185	0.002915	0.0097675	0.202527	-0.0125313	0.0205238	-0.0181212	-0.020565	-0.00304625	-0.00911375	0.08696	-0.032195	-0.0910062	-0.113445	-0.04636	-0.0303275	-0.074395	-0.109826	-0.00010875	0.0325275	0.263526	-0.0190838
YBR208C	DUR1,2	Urea amidolyase; contains both urea carboxylase and allophanate hydrolase activities, degrades urea to CO2 and NH3; expression sensitive to nitrogen catabolite repression and induced by allophanate, an intermediate in allantoin degradation; protein abundance increases in response to DNA replication stress	-0.00697	-0.044145	0.0305625	0.0392562	-0.107489	0.00732125	-0.13058	-0.143765	-0.0695575	-0.0996625	0.01552	-0.100057	-0.0343288	-0.119454	0.115888	0.0332	-0.124702	-0.0404062	-0.0158875	0.0187475	-0.0116175	0.0356575	-0.0412875	-0.083005	0.0387975	-0.176093	0.00464	0.0546575
YBR209W		Dubious open reading frame; unlikely to encode a functional protein, based on available experimental and comparative sequence data; YBR209W is not an essential gene	0.0362175	-0.140461	-0.07199	0	0.0811425	0.0127387	0.001245	0.0966588	-0.03072	-0.00507375	0.0421388	0.022255	0.039365	0.0669763	-0.00242375	0.03682	0.198895	-0.0171875	0.0551212	-0.03286	-0.023985	0.067935	0.00446
YBR210W	ERV15	Protein involved in export of proteins from the endoplasmic reticulum; ERV15 has a paralog, ERV14, that arose from the whole genome duplication	0.0597375	-0.093785	-0.0209438	-0.141088	0.0144075	-0.0291425	-0.0802188	-0.058925	0.0479887	-0.0487125	0.06592	0.0144987	-0.0283075	0.09781	0.0511875	0.09476	0.0275925	-0.0158938	-0.103065	-0.00611	0.14737	0.0308425	-0.027815
YBR211C	AME1	Essential kinetochore protein associated with microtubules and SPBs; component of the kinetochore sub-complex COMA (Ctf19p, Okp1p, Mcm21p, Ame1p); involved in spindle checkpoint maintenance; orthologous to human centromere constitutive-associated network (CCAN) subunit CENP-U and fission yeast Mis17; relative distribution to the nucleus increases upon DNA replication stress	0.170664	-0.189219	-0.0584725	-0.255481	0.05631	0.0131425	0.0279562	0.115526	0.0133788	-0.17891	-0.04244	-0.090925	-0.0558188	0.119292	0.0239038	0.183151	0.00620625	-0.0664225	-0.0456475	0.0680275	0.043325	0.250305	-0.0812413	1.15061	0.597515	0.290734	2.09647	1.37914
YBR212W	NGR1	RNA binding protein that negatively regulates growth rate; interacts with the 3' UTR of the mitochondrial porin (POR1) mRNA and enhances its degradation; overexpression impairs mitochondrial function; interacts with Dhh1p to mediate POR1 mRNA decay; expressed in stationary phase	-0.00203	-0.0637125	0.0071775	-0.0547575	0.14539	-0.0196662	0.0488837	-0.0162175	-0.0523825	0.0188375	0.120089	-0.0413087	0.154744	-0.0599325	0.089295	0.100623	-0.0676925	-0.0763687	0.138485	0.0148825	0.0112987	-0.05301	0.050635	0.132871	0.440459	-0.0891813	0.0041425	0.0166175
YBR213W	MET8	Bifunctional dehydrogenase and ferrochelatase; involved in the biosynthesis of siroheme, a prosthetic group used by sulfite reductase; required for sulfate assimilation and methionine biosynthesis	0.04382	-0.0459175	-0.238187	-0.01663	-0.079615	-0.000405	-0.0881875	-0.0573775	-0.0301175	0.0743175	-0.0804725	-0.006075	-0.0486637	0.111955	0.0364925	0.0395138	0.0333675	-0.043855	-0.0811625	-0.05016	0.031595	0.0064575	-0.0101525
YBR214W	SDS24	Protein involved in cell separation during budding; one of two S. cerevisiae homologs (Sds23p and Sds24p) of the S. pombe Sds23 protein, which is implicated in APC/cyclosome regulation; may play an indirect role in fluid-phase endocytosis; protein abundance increases in response to DNA replication stress; SDS24 has a paralog, SDS23, that arose from the whole genome duplication	-0.06494	0.00952125	0.0272025	-0.0116813	-0.0362888	-0.138275	-0.042335	0.0311875	-0.06046	-0.02085	-0.0455363	-0.075915	-0.0953925	-0.0175975	-0.020745	-0.0115163	0.09739	-0.0691025	-0.087005	-0.128878	-0.02164	-0.09764	-0.024265	-0.332823	0.0790812	-0.0377963	0.0446538	0.01215
YBR215W	HPC2	Subunit of the HIR complex; HIR is a nucleosome assembly complex involved in regulation of histone gene transcription; mutants display synthetic defects with subunits of FACT, a complex that allows passage of RNA Pol II through nucleosomes	0.0313925	-0.345375	-0.0490087	0.285253	-0.137836	0.0940125	-0.0269262	-0.04279	0.306341	0.27107	-0.132009	-0.042395	0.202275	0.119188	0.114283	0.0622337	0.089295	0.023175	-0.0002525	0.0692275	-0.278275	0.08025	0.05436	-0.01691	0.153989	-0.02899	-0.033585	0.07033
YBR216C	YBP1	Protein involved in cellular response to oxidative stress; required for oxidation of specific cysteine residues of transcription factor Yap1p, resulting in nuclear localization of Yap1p in response to stress; YBP1 has a paralog, YBP2, that arose from the whole genome duplication	0.0149888	0.150309	-0.03375	0.0593425	-0.06581	-0.0274287	-0.08193	0.011715	-0.0309425	0.092905	-0.0268763	-0.0762475	0.0139975	0.0660062	0.110132	0.025645	0.0798512	0.0153188	0.0611425	0.0443825	-0.125238	-0.034085	-0.00051375	-0.0830963	-0.0313037	0.0195712	0.933715	-0.00255375
YBR217W	ATG12	Ubiquitin-like modifier involved in autophagy and the Cvt pathway; conserved; conjugated to Atg5p to form a complex involved in Atg8p lipidation; Atg5p-Atg12p conjugate enhances E2 activity of Atg3p by rearranging its catalytic site, also forms a complex with Atg16p; the Atg5-Atg12/Atg16 complex binds to membranes and is essential for autophagosome formation	-0.0825862	-0.0401588	-0.00644625	0.0437688	-0.01835	0.0389975	0.0423	-0.220934	0.0592663	-0.0241188	0.01389	0.0703338	-0.0283425	-0.0217775	-0.15193	-0.0754912	-0.03702	0.0630162	-0.110567	-0.0177125	-0.08389	-0.0391375	-0.0300975
YBR218C	PYC2	Pyruvate carboxylase isoform; cytoplasmic enzyme that converts pyruvate to oxaloacetate; differentially regulated than isoform Pyc1p; mutations in the human homolog are associated with lactic acidosis; PYC2 has a paralog, PYC1, that arose from the whole genome duplication	0.00551875	0.0631113	0.0047675	0.240685	-0.006835	-0.0602088	0.0356025	0.0315075	-0.0638	-0.00370625	0.02647	0.12848	-0.00078125	-0.0136725	-0.064375	-0.046935	0.020015	-0.00214625	-0.0164075	-0.109401	-0.0124075	0.0278063	0.0232788	-0.159061	0.460066	0.0178038	-0.00593	0.238926
YBR219C		Putative protein of unknown function; YBR219C is not an essential gene	0.104571	0.0216612	0.069695	0.114318	-0.100726	0.08869	-0.139496	-0.00948	0.0302525	-0.0137875	-0.135366	0.0040625	-0.0179725	0.151103	-0.0352625	0.0493362	0.192048	0.043735	0.010745	0.0715637	0.08268	-0.0359937	0.0110762
YBR220C		Putative protein of unknown function; YBR220C is not an essential gene	0.0988875	0.00741	0.0305525	0.0107675	0.0610375	-0.0498525	-0.147821	-0.0230088	-0.108387	-0.0454587	-0.01345	-0.145445	-0.0113425	0.011195	-0.010335	0.004675	-0.110242	-0.0472975	-0.0383662	-0.008375	-0.050625	-0.0561975	-0.0217975
YBR221C	PDB1	E1 beta subunit of the pyruvate dehydrogenase (PDH) complex; PDH is an evolutionarily conserved multi-protein complex found in mitochondria	0.044415	-0.13258	-0.111359	-0.0218575	-0.19436	-0.107879	-0.0137725	0.064165	-0.246773	0.06043	0.0291537	-0.0600938	0.102574	-0.085805	0.195585	0.05372	-0.02567	-0.0846675	0.119104	0.00596375	0.103751	0.116136	0.01277	0.009935	-0.133225	-0.0430362	-0.0162062	-0.03883
YBR222C	PCS60	Oxalyl-CoA synthetase; capable of catalyzing conversion of oxalate to oxalyl-CoA; catalyzes first step in pathway of oxalate degradation that functions to protect yeast from inhibitory effects of oxalate; peroxisomal protein that binds mRNA; localizes to both peroxisomal peripheral membrane and matrix, expression is highly inducible by oleic acid; similar to E. coli long chain acyl-CoA synthetase	-0.141124	-0.00303375	0.0141225	-0.008905	-0.044285	-0.099005	0.208499	0.07955	0.166734	1.20242	0.0997912	0.36702	0.004365	0.03641	0.010365	0.0229875	0.17889	0.0791712	0.126121	0.00584375	-0.0256613	-0.0456737	0.059925	0.462558	0.856275	-0.181621	0.398379	0.0953525
YBR223C	TDP1	Tyrosyl-DNA phosphodiesterase I; hydrolyzes 3' and 5'-phosphotyrosyl bonds; involved in the repair of DNA lesions created by topo I and topo II; mutations in the human homolog, TDP1, result in the a neurodegenerative disease, spinocerebellar ataxia with axonal neuropathy (SCAN1); yeast cells and human rhabdomyosarcoma lines that overexpress TDP1 both exhibit elevated dosage chromosomal instabilit…	0.0170875	-0.0462125	-0.050845	-8.67362e-19	0.107203	-0.0114475	0.0273	0.118425	-0.1582	0.0092825	-0.0372113	0.0770875	-0.0281437	-0.0979888	0.0879013	-0.0195612	0.04348	-0.0107788	-0.0174538	-0.0212313	-0.0488562	0.003865	0.0299263	-0.139967	-0.022405	0.031535	-0.0319475	-0.0706013
YBR224W		Dubious open reading frame; unlikely to encode a functional protein, based on available experimental and comparative sequence data; partially overlaps the verified gene TDP1	0.102667	-0.03054	-0.03112	0.05266	-0.173118	0.0201825	0.154185	-0.0381775	-0.0139725	-0.0257725	0.0149075	0.21074	-0.0548013	-0.116782	0.0130175	-0.0703475	-0.0693625	0.162875	-0.02243	-0.011205	0.048415	0.06143	-0.0435475
YBR225W		Putative protein of unknown function; non-essential gene identified in a screen for mutants affected in mannosylphophorylation of cell wall components	0.00653125	-0.0387125	0.00426	-0.0172488	-0.0123575	0.056715	-0.180166	-0.0348613	-0.03626	-0.0134375	0.065415	-0.0176963	-0.102959	-0.0294125	-0.00644625	-0.00973375	0.0324912	0.0488925	-0.00752375	0.104339	0.0314712	-0.0003175	-0.0296475	0.321902	0.24202	0.55469	0.41493	0.565835
YBR226C		Dubious open reading frame; unlikely to encode a functional protein, based on available experimental and comparative sequence data; partially overlaps the uncharacterized ORF YBR225W	0.0083925	0.0515238	-0.09646	0.039705	0.08039	-0.0789275	0.362967	-0.0357875	-0.102259	-0.0824	-0.00932	0.0717075	0.022245	0.100007	0.017885	0.0125487	0.227582	0.165695	0.143895	0.0403875	0.0696825	0.0791575	0.0123325
YBR227C	MCX1	Non-proteolytic ATPase of the AAA family; stimulates incorporation of the pyridoxal phosphate cofactor into Hem1p (5-aminolevulinic acid synthase); localized to the mitochondrial matrix; ortholog of vertebrate CLPX, which promotes erythropoiesis	0.01197	-0.00209125	0.0154425	0.0330112	-0.03062	-0.00237875	-0.03088	-0.151078	0.0247512	0.0428512	-0.02999	0.01324	-0.12082	-0.0914525	0.00573625	-0.0104838	-0.0368225	0.0242288	-0.047015	-0.07097	-0.012665	-0.0512325	-0.10574	-0.0655125	0.0941775	0.30161	-0.355893	-0.218472
YBR228W	SLX1	Endonuclease involved in DNA recombination and repair; subunit of a complex, with Slx4p, that hydrolyzes 5' branches from duplex DNA in response to stalled or converging replication forks; function overlaps with that of Sgs1p-Top3p	-0.0672263	0.0465475	0.0141375	-0.0147163	0.0153575	0.0560825	0.0454175	0.0888437	0.0355987	-0.0368462	-0.0529188	-0.0165863	0.0893575	0.0116363	-0.0599963	0.0265988	0.00817875	-0.0432625	-0.00314875	-0.0121587	0.00892125	0.0662688	-0.0606125
YBR229C	ROT2	Glucosidase II catalytic subunit; required to trim the final glucose in N-linked glycans; required for normal cell wall synthesis; mutations in rot2 suppress tor2 mutations, and are synthetically lethal with rot1 mutations	0.0481137	0.0612075	-0.00379	-0.059975	0.156653	0.0259487	0.178877	-0.00031375	-0.137729	-0.00435	-0.053825	0.00780625	-0.0284925	0.0401688	-0.0293862	0.00835	-0.00521	-0.0162837	0.0889737	0.008465	0.0332775	0.036265	0.0309763
YBR230C	OM14	Mitochondrial outer membrane receptor for cytosolic ribosomes; integral protein of the outer membrane that interacts with the nascent chain-associated complex (NAC) bound to ribosomes, contributing to co-translational mitochondrial import; interacts with porin (Por1p) and Om45p; abundance is decreased in cells grown in glucose relative to other carbon sources	-0.00666375	-0.0257775	0.00376625	0.0454275	-0.0502425	0.0278775	-0.048475	-0.103771	0.0517113	0.00488125	0.00946875	-0.0149788	0.0151462	-0.00575625	-0.0551187	-0.0727875	0.0060325	-0.0366288	-0.03778	-0.0206313	-0.00651125	-0.0832037	-0.03642	-0.05556	0.153411	-0.0396287	0.147919	-0.0718975
YBR231C	SWC5	Component of the SWR1 complex; complex exchanges histone variant H2AZ (Htz1p) for chromatin-bound histone H2A; protein abundance increases in response to DNA replication stress; relocalizes to the cytosol in response to hypoxia	0.0990325	-0.0522987	-0.190085	0.219793	0.128504	0.0099725	0.0622875	0.146051	0.0543875	0.02046	-0.0281137	-0.02972	-0.135783	-0.0256025	0.142965	0.07407	0.044295	-0.0191725	-0.183572	-0.0231975	-0.0093925	-0.00048	0.289679	0.182528	-0.0200113	-0.146613	-0.070785	0.625877
YBR232C		Dubious open reading frame; unlikely to encode a functional protein, based on available experimental and comparative sequence data	-0.0239725	-0.09604	-0.0565437	0.0537062	-0.174955	0.00181	0.0989675	0.125136	0.00352375	-0.0414025	-0.0157462	0.0415425	0.0677825	0.0020625	-0.01283	0.0156425	0.0182775	0.0108825	-0.00925625	-0.0340125	0.0223563	0.05229	-0.0253388
YBR233W	PBP2	RNA binding protein; has similarity to mammalian heterogeneous nuclear RNP K protein, involved in the regulation of telomere position effect and telomere length; relative distribution to the nucleus increases upon DNA replication stress	0.060605	-0.07644	0.030245	-0.0149375	0.074105	-0.00145	-0.0488287	0.0639425	0.03756	0.057665	-0.0006875	0.227878	0.00778	-0.03693	0.139295	-0.0254625	0.0996875	0.0777525	-0.048855	-0.0037075	-0.01335	0.0730025	0.0515275	-0.161434	-0.0231375	-0.311855	-0.0628738	0.0465175
YBR233W-A	DAD3	Essential subunit of the Dam1 complex (aka DASH complex); complex couples kinetochores to the force produced by MT depolymerization thereby aiding in chromosome segregation; is transferred to the kinetochore prior to mitosis	0.0731675	1.02088	0.215702	0.72609	2.08596	0.738908	0.768373	0.345234	0.706242	1.35303	-0.0170987	1.09716	1.51673	1.31846	-0.068375	-0.101115	1.23305	0.342835	1.52276	0.8721	0.243432	1.15755	1.45305	1.85268	0.0108413	0.571017	1.19414	1.02105
YBR234C	ARC40	Subunit of the ARP2/3 complex; ARP2/3 is required for the motility and integrity of cortical actin patches	0.22808	-0.04257	0.00299625	0.11462	-0.0238575	0.0891075	-0.0534575	-0.00449	0.0311975	0.186999	0.0180888	0.084265	0.0701462	0.02484	-0.0217	0.0197275	0.126817	-0.111327	0.00642	0.06617	-0.0670375	-0.087735	-0.0335538	1.24993	0.384195	-0.364347	0.277261	0.05395
YBR235W	VHC1	Vacuolar membrane cation-chloride cotransporter (CCC); likely mediates K+ and Cl- cotransport into the vacuole; has a role in potassium homeostasis and salt tolerance; localizes to sites of contact between the vacuole and mitochondria (vCLAMPs); similar to mammalian electroneutral Na(+)-(K+)-C1- cotransporter family	0.16738	-0.151114	-0.069195	0.00494375	-0.097405	0.0392725	-0.041945	-0.02393	-0.04938	0.083995	0.00487	-0.056665	0.0652775	-0.0281337	-0.028635	0.035825	0.0804712	-0.0295875	0.077135	0.0257075	0.056	-0.0222262	-0.0421725	0.185363	-0.0395156	-0.0691294	0.031105	0.0559287
YBR236C	ABD1	Methyltransferase; catalyzes the transfer of a methyl group from S-adenosylmethionine to the GpppN terminus of capped mRNA; nuclear protein that relocalizes to the cytosol in response to hypoxia	0.233681	-0.0858937	0.08632	0.0781325	0.924964	0.0613638	0.186677	0.062375	0.01834	0.272348	0.01536	0.0413837	0.067965	0.300519	-0.0197562	0.0545962	0.24177	0.0214325	0.116149	0.38202	0.113592	0.0153188	0.0146875	0.330358	-0.121925	-0.122369	0.08041	-0.003
YBR237W	PRP5	RNA helicase in the DEAD-box family; necessary for prespliceosome formation, bridges U1 and U2 snRNPs and enables stable U2 snRNP association with intron RNA	0.35117	1.35652	0.269269	0.793291	2.26994	0.744646	-0.03699	0.375651	1.57709	1.45499	0.0835775	0.17196	1.2104	0.240454	1.1793	1.15945	1.70392	-0.233796	-0.103024	0.536611	0.140475	-0.031855	0.55906	-0.1572	1.33471	0.59294	0.1211	1.33037
YBR238C		Mitochondrial membrane protein; not required for respiratory growth but causes a synthetic respiratory defect in combination with rmd9 mutations; transcriptionally up-regulated by TOR; deletion increases life span; YBR238C has a paralog, RMD9, that arose from the whole genome duplication	0.0053775	0.09725	0.007835	0.051515	0.03206	-0.0083775	0.437856	-0.195965	-0.141595	0.0030075	-0.0125325	0.0463063	0.0642575	-0.0146925	0.0099125	-0.0390225	-0.0439875	-0.071275	0.0456975	0.0205075	0.190535	0.103722	0.0164025	-0.080995	0.0085925	-0.12623	0.0027425	0.0667362
YBR239C	ERT1	Transcriptional regulator; involved in regulation of gluconeogenesis and fermentable carbon utilization; GFP-fusion protein localizes to cytoplasm, nucleus; null mutation affects periodicity of transcriptional and metabolic oscillation; plays role in restricting Ty1 transposition; member of the zinc cluster family of proteins, similar to Rds2p	0.045925	-0.0390475	0.0285125	0.0504238	-0.0230875	0.05875	0.0247675	-0.0321287	-0.036315	0.0976775	-0.0669975	-0.105186	0.0473375	0.0217425	-0.107849	-0.0165025	-0.001915	0.100157	0.0045175	0.04531	-0.150198	0.0128263	0.0112513	-0.07155	-0.12791	-0.0272088	-0.052815	0.0607088
YBR240C	THI2	Transcriptional activator of thiamine biosynthetic genes; interacts with regulatory factor Thi3p to control expression of thiamine biosynthetic genes with respect to thiamine availability; acts together with Pdc2p to respond to thiaminediphosphate demand, possibly as related to carbon source availability; zinc finger protein of the Zn(II)2Cys6 type	0.0370938	0.07772	0.0596312	-0.0112762	-0.0753875	-0.0127288	0.013365	-0.184754	0.032885	-0.0291737	0.00645	0.0393175	0.052755	0.0654025	-0.133745	-0.07184	-0.0492788	-0.00592	0.131442	0.05859	0.0216238	-0.0873113	-0.0123663
YBR241C		Putative transporter, member of the sugar porter family; green fluorescent protein (GFP)-fusion protein localizes to the vacuolar membrane; YBR241C is not an essential gene; YBR241C has a paralog, VPS73, that arose from the whole genome duplication	0.00711	-0.0350975	-0.140634	-0.0242587	-0.047365	0.0355375	-0.01545	-0.0927025	-0.129238	0.120545	0.00243125	0.065865	0.00159	0.026325	0.01656	0.0009675	0.0292775	-0.0027725	0.01829	-0.0433725	-0.02546	0.12891	0.086585	-0.150744	0.0142538	0.0644487	0.347042	-0.152935
YBR242W		Putative protein of unknown function; green fluorescent protein (GFP)-fusion protein localizes to the cytoplasm and nucleus; YBR242W is not an essential gene; YBR242W has a paralog, YGL101W, that arose from the whole genome duplication	-0.03646	0.0094725	0.061205	0.0049675	-0.01798	0.00662	0.0244575	0.515846	0.019095	-0.0482462	0.03946	-0.07031	0.0043175	-0.085075	0.0317425	-0.05333	0.0124175	0.0328675	-0.0200475	-0.073735	-0.02646	-0.059095	-0.07701	-0.11984	-0.00180875	0.00172875	0.08804	-0.0129838
YBR243C	ALG7	UDP-N-acetyl-glucosamine-1-P transferase; transfers Glc-Nac-P from UDP-GlcNac to Dol-P in the ER in the first step of the dolichol pathway of protein asparagine-linked glycosylation; inhibited by tunicamycin; human homolog DPAGT1 can complement yeast ALG7 mutant	-0.03067		0.0619562	-0.124284	-0.778803	-0.0116113	-0.08029	0.617642	0.0348025	-0.0998887	-0.0582988	-0.0463525	0.008215	0.0290975		-0.369082	0.06572	0.023265	-0.038065	-0.065765	-0.00239	-0.02774	0.10467
YBR244W	GPX2	Phospholipid hydroperoxide glutathione peroxidase; protects cells from phospholipid hydroperoxides and nonphospholipid peroxides during oxidative stress; induced by glucose starvation; protein abundance increases in response to DNA replication stress	0.0224013	-0.0972	0.00014875	-0.0148675	-0.042165	-0.036465	-0.074285	-0.0288613	-0.0320988	0.0554863	0.0489388	-0.171954	0.0242837	0.0628438	0.0943538	0.0199175	0.0283825	-0.0380987	0.0803175	0.0520987	-0.0423787	0.0131863	-0.01065	-0.14119	-0.0972825	-0.0087675	0.017735	-0.0047825
YBR245C	ISW1	ATPase subunit of imitation-switch (ISWI) class chromatin remodelers; with Ioc3p forms Isw1a complex involved in repression of transcription initiation; with Ioc2p and Ioc4p forms Isw1b complex involved in regulation of transcription elongation; Isw1b recruited to ORFs by H3K36 methylation and acts with Chd1p to prevent trans-histone exchange over coding regions; Isw1p import into nucleus depends…	0.162408	-0.06459	-0.0264412	0.01577	0.00860875	-0.00618125	-0.00724375	0.0680575	-0.09029	-0.0232863	-0.0532263	-0.0572775	0.0170663	-0.0876875	-0.0671525	-0.0160237	0.145086	-0.0533788	-0.0563525	-0.0416825	0.121866	-0.0997813	0.0891637	0.005025	-0.170594	0.0746837	0.0243713	-0.0142588
YBR246W	RRT2	Methylesterase performing penultimate step of diphthamide biosynthesis; hydrolyzes methylated diphthine to produce diphthine and allows Dph6-catalyzed amidation reaction to occur; deletion leads to resistance to sordarin and accumulation of methylatediphthine; WD40 domain-containing protein; involved in endosomal recycling; forms complex with Rtt10p that functions in retromer-mediated pathway for…	0.0803563	-0.0874638	-0.265257	0.00648625	0.15661	0.0087825	0.121485	-0.0563213	-0.0692475	-0.02539	-0.0490113	-0.0473225	0.10061	-0.03086	0.037455	0.006845	0.0171075	-0.0464225	0.0390125	-0.0364625	0.115344	0.0498388	-0.0328475
YBR247C	ENP1	Protein associated with U3 and U14 snoRNAs; required for pre-rRNA processing and 40S ribosomal subunit synthesis; localized in the nucleus and concentrated in the nucleolus; human BYSL functionally complements the heat sensitivity of an enp1 ts mutant	0.03847		0.0707838	-0.134961		-0.01577	-0.0433438	0.023145	0.0088425	-0.0143275	0.0801375	0.0065275	0.055245	-0.06555			-0.0496275	0.0344187	0.0353075	0.055545	0.0499275	-0.0517925	0.0011025	1.18366	0.10029	0.676558	0.079785	0.0669125
YBR248C	HIS7	Imidazole glycerol phosphate synthase; glutamine amidotransferase:cyclase that catalyzes the fifth step of histidine biosynthesis and also produces 5-aminoimidazole-4-carboxamide ribotide (AICAR), a purine precursor	-0.00668	0.00535	-0.0858613	0.0256387	0.0182825	-0.10861	-0.0424875	-0.153331	0.02343	-0.139455	0.00406	0.0264437	0.0303563	-0.0934637	-0.0346512	-0.0009225	-0.017375	0.0673875	0.0331337	0.0388325	0.00738875	-0.02426	-0.055675	0.386564	0.177121	0.414195	0.060715	0.21951
YBR249C	ARO4	3-deoxy-D-arabino-heptulosonate-7-phosphate (DAHP) synthase; catalyzes the first step in aromatic amino acid biosynthesis and is feedback-inhibited by tyrosine or high concentrations of phenylalanine or tryptophan; relative distribution to the nucleus increases upon DNA replication stress	0.039695	0.0387188	0.04192	-0.08996	0.0141425	-0.0996975	0.0555875	-0.1159	-0.0204712	-0.0226212	0.011985	-0.154977	-0.02629	-0.0251388	0.0251388	0.00442625	0.01207	-0.092355	0.0775387	0.046815	-0.105045	0.108256	0.0313425	1.11922	0.568589	0.06394	0.313224	0.0723675
YBR250W	SPO23	Protein of unknown function; associates with meiosis-specific protein Spo1p	-0.0499163	0.204022	-0.0491325	0.0302912	0.051455	-0.0096975	0.222305	0.05682	-0.0874475	0.0014275	-0.00641125	-0.0229187	-0.0114138	-0.01393	-0.09264	-0.0210275	0.01186	0.0381575	-0.0849675	-0.0314425	-0.0515437	0.0682075	0.0502925
YBR251W	MRPS5	Mitochondrial ribosomal protein of the small subunit	-0.0509575	0.0335512	0.026255	0.00014	-0.0129487	0.0815687	-0.09229	-0.055185	-0.0356725	0.0268787	0.0276263	-0.0317487	-0.0133887	-0.0206787	0.0459688	-0.0021575	0.081355	-0.0239475	-0.0123838	0.0105862	0.00395625	-0.0146425	-0.012845	0.139072	-0.0554975	-0.118725	-0.303125	-0.25523
YBR252W	DUT1	Deoxyuridine triphosphate diphosphatase (dUTPase); catalyzes hydrolysis of dUTP to dUMP and PPi, thereby preventing incorporation of uracil into DNA during replication; critical for the maintenance of genetic stability; also has diphosphatase activity on deoxyinosine triphosphate; human homolog DUT allows growth of yeast haploid dut1 null mutant after sporulation of heterozygous diploid	-0.0887375	0.008855	-0.0655363	0.100535	-0.00741	-0.0288575	0.0168888	0.0700675	-0.199444	0.344925	-0.0265275	-0.114281	-0.04928	0.04627	-0.06723	0.03656	0.0451525	0.0194313	-0.029065	-0.046395	0.150215	-0.168555	-0.073005	-0.0286563	0.427245	-0.338021	0.131279	0.111581
YBR253W	SRB6	Subunit of the RNA polymerase II mediator complex; associates with core polymerase subunits to form the RNA polymerase II holoenzyme; essential for transcriptional regulation	0.0916075	0.119957	0.116721	-0.130689	1.29276	0.550645	0.153642	0.709874	0.0632588	-0.0048475	-0.0202713	0.127177	0.1496	0.417627	-0.00495	0.00723	-0.0615175	0.222718	1.11102	0.986072	-0.0174363	0.318877	-0.0246013	1.00513	0.0780012	0.216335	0.310717	0.114375
YBR254C	TRS20	Core component of transport protein particle (TRAPP) complexes I-III; TRAPPs are multimeric guanine nucleotide-exchange factors for GTPase Ypt1p, regulating ER-Golgi traffic (TRAPPI), intra-Golgi traffic (TRAPPII), endosome-Golgi traffic (TRAPPII and III) and autophagy (TRAPPIII); mutation leads to defects in endocytic recycling, block in sporulation/meiosis; mutations in human homolog TRAPPC2 ca…	0.0666725		0.653317	0.126526	0.43965	0.321331	0.211566	0.536381	-0.0316413	1.03821	0.374115	1.78262	1.55107	1.87136	-0.0182513	0.420594	1.16057	0.792973	1.15251	1.33641	0.0121913	1.38858	1.17479	0.927843	0.135807	1.21381	0.321679	0.3191
YBR255W	MTC4	Protein of unknown function; required for normal growth rate at 15 degrees C; green fluorescent protein (GFP)-fusion protein localizes to the cytoplasm in a punctate pattern; mtc4 is synthetically sick with cdc13-1	-0.035475	0.23948	-0.00364125	0.00814625	-0.0924487	0.004675	-0.0756687	-0.020155	-0.0410425	0.003695	0.0198675	0.0358125	-0.040165	0.00403	-0.0484325	-0.0202125	0.0647975	0.01637	-0.113333	0.0318625	-0.09948	0.0905225	-0.0437	-0.180594	-0.0691	0.0528387	-0.0469313	-0.0736762
YBR256C	RIB5	Riboflavin synthase; catalyzes the last step of the riboflavin biosynthesis pathway	0.0518525	0.03547	0.00911625	0.00969375	-0.0070225	-0.0294475	-0.0716625	-0.152487	0.0485275	0.0027	0.012305	-0.03906	0.0089425	0.00389	0.01363	0.021675	0.0034125	-0.01656	0.08446	-0.00461	0.097635	-0.05819	0.00679	-0.304708	-0.0804788	-0.0173263	-0.0158675	-0.226585
YBR257W	POP4	Subunit of both RNase MRP and nuclear RNase P; RNase MRP cleaves pre-rRNA, while nuclear RNase P cleaves tRNA precursors to generate mature 5' ends and facilitates turnover of nuclear RNAs; binds to the RPR1 RNA subunit in RNase P	-0.0418175	-0.101947		-0.000845		-0.0198737	0.300056	-0.207758	-0.087965	-0.210215	-0.0279863	0.606481	0.292189	0.267915	-0.21069	-0.0163187	0.245457	0.403521	-0.096425	-0.551453	-0.315012	-0.224153	-0.306463
YBR258C	SHG1	Subunit of the COMPASS (Set1C) complex; COMPASS methylates histone H3 on lysine 4 and is required in transcriptional silencing near telomeres	0.09082	0.0220675	-0.06749	-0.0818975	0.071235	0.0359688	-0.107709	0.0915288	0.0113413	-0.0635963	0.0319137	-0.221974	-0.01335	0.178583	0.0311875	0.141649	-0.00932	-0.0311913	0.0747613	-0.0616975	0.06484	0.0561025	0.0445612	-0.0754937	0.0272475	-0.399259	-0.0128512	-0.0878712
YBR259W		Protein of unknown function; YBR259W is not an essential gene; forms cytoplasmic foci upon DNA replication stress	-0.013375	0.134351	-0.0108662	0.0247512	-0.122841	-0.01259	-0.07354	-0.0118575	-0.0572875	-0.0557187	-0.01711	-0.0523425	0.008675	-0.0725425	-0.0024125	0.01525	-0.07979	-0.05872	-0.0035525	0.0215975	0.0110437	-0.0213225	0.00014	-0.0981575	-0.0270425	0.16214	-0.05679	-0.0203475
YBR260C	RGD1	GTPase-activating protein (RhoGAP) for Rho3p and Rho4p; possibly involved in control of actin cytoskeleton organization	-0.0473988	-0.006555	0.196213	0.11777	-0.04005	0.0291337	0.0301212	0.0351	0.011225	0.095515	-0.091875	0.103	0.17217	0.213838	-0.03514	-0.109814	0.0960375	-0.0161512	0.217768	0.176195	0.0539075	0.123695	0.0078625	-0.112644	-0.03179	-0.099065	0.0080525	0.150001
YBR261C	TAE1	AdoMet-dependent proline methyltransferase; catalyzes the dimethylation of ribosomal proteins Rpl12 and Rps25 at N-terminal proline residues; has a role in protein synthesis; fusion protein localizes to the cytoplasm	-0.0205812	-0.08362	0.0580838	0.011705	-0.08033	-0.014315	0.0411062	-0.113651	0.018465	-0.0592087	0.0379562	-0.00824875	-0.00925875	-0.003775	-0.023425	-0.01392	-0.03024	0.00435625	0.0202387	-0.06447	0.0927213	-0.014375	0.0252575	-0.109725	-0.00672625	-0.0404275	-0.0489363	-0.1608
YBR262C	MIC12	Component of the MICOS complex; MICOS (formerly MINOS or MitOS) is a mitochondrial inner membrane complex that extends into the intermembrane space and has a role in the maintenance of crista junctions, inner membrane architecture, and formation of contact sites to the outer membrane; forms a subcomplex with Mic10p and Mic27p whose assembly and stability requires cardiolipin	-0.021545	-0.0016525	0.032045	-0.068	-0.053075	-0.0320225	-0.217306	-0.0345	0.0052225	0.0007325	-0.017995	-0.150185	0.0394425	-0.01524	0.0042075	0.0431325	0.0497937	-0.117888	-0.00749	-0.007375	-0.05189	0.0304725	-0.00966	0.0977225	-0.14342	-0.03153	0.15917	-0.103887
YBR263W	SHM1	Mitochondrial serine hydroxymethyltransferase; converts serine to glycine plus 5,10 methylenetetrahydrofolate; involved in generating precursors for purine, pyrimidine, amino acid, and lipid biosynthesis; reverse reaction generates serine	-0.0353575	0.0214325	0.04288	-0.00238625	0.098515	0.0360238	-0.0883675	-0.0707625	0.00518375	-0.020555	-0.0107212	0.00874625	0.03787	-0.03291	-0.050865	-0.0418875	0.023745	-0.0216225	-0.013925	0.00914	-0.085555	-0.00596	-0.0440513	-0.12986	0.0224225	-0.171403	0.06475	-0.055655
YBR264C	YPT10	Rab family GTP-binding protein; contains the PEST signal sequence specific for proteolytic enzymes; may be involved in vesicular transport; overexpression leads to accumulation of Golgi-like cisternae with budding vesicles	0.0397575	0.12249	0.0087425	-0.0425175	0.044985	-0.0193775	-0.0654175	0.0317625	0.121525	0.10342	0.008145	-0.0810975	0.0962	0.0086175	-0.07366	-0.0048875	-0.0287063	-0.055585	0.0450975	-0.0613925	0.00216875	0.0273262	-0.03779	-0.102431	-0.119144	-0.137577	-0.09238	-0.10185
YBR265W	TSC10	3-ketosphinganine reductase; catalyzes the second step in phytosphingosine synthesis; essential for growth in the absence of exogenous dihydrosphingosine or phytosphingosine; localized to lipid droplets; member of short chain dehydrogenase/reductase protein family	-0.04672	-0.0041575	0.05127	0.0669463	0.00988	0.0157975	-0.0533625	0.0176	-0.107176	0.175965	0.034935	-0.087235	0.0684463	-0.065075	-0.0308812	-0.02729	-0.0304175	-0.0335613	-0.10125	0.05582	0.006765	-0.02457	-0.0714063	0.03539	0.129527	-0.0833975	-0.0508937	-0.0901
YBR266C	SLM6	Protein with a potential role in actin cytoskeleton organization; gene exhibits synthetic genetic interaction with MSS4 encoding phosphatidylinositol 4-phosphate kinase	-0.00802		0.0372875	0.001975		0.328842		-0.13477			0.0644675	-0.009075	-0.0426825		0.241315	-0.035775		0.005865	-0.251368	-0.109552	0.0415238
YBR267W	REI1	Cytoplasmic pre-60S factor; required for the correct recycling of shuttling factors Alb1, Arx1 and Tif6 at the end of the ribosomal large subunit biogenesis; involved in bud growth in the mitotic signaling network	0.176261	-0.102614	0.22854	0.0135288	-0.113138	-0.0751725	-0.0575787	-0.0173662	-0.024125	-0.331278	0.0197625	-0.115566	-0.01638	-0.0289875	0	0.004285	0.133225	0.0356675	-0.0430688	0.0626925	0.006035	-0.03438	-0.0374875	1.17693	0.149541	-0.0913975	0.28939	0.164892
YBR268W	MRPL37	Mitochondrial ribosomal protein of the large subunit	-0.00804	-0.269445	0.10813	-0.0105413	-0.0301163	-0.0216325	0.15709	0.240434	0.09696	0.0250025	0.0848213	0.04057	-0.0578287	0.08792	0.0003025	-0.0124375	0.110207	-0.00593	0.0101863	-0.0025275	-0.07464	0.01774	-0.0015375	-0.227205	-0.3868	-0.492507	-0.0853225	-0.19653
YBR269C	SDH8	Protein required for assembly of succinate dehydrogenase; interacts with flavinylated Sdh1p and may function as a chaperone for free Sdh1p, protecting its FAD cofactor from redox reactions before assembly of the complex; soluble protein of the mitochondrial matrix; respiratory defect of null mutant is functionally complemented by Drosophila and human orthologs	0.0731475	-0.2668	-0.0225025	-0.0730163	-0.00681375	-0.0282975	-0.0838475	-0.657177	-0.000605	0.002355	0.017475	0.0044975	-0.0676875	-0.0400975	0.003135	0.0124675	0.0153625	0.0476975	-0.160435	0.0118	-0.0957525	0.043325	0.038275	0.122856	-0.19203	-0.0503687	-0.213421	-0.0240337
YBR270C	BIT2	Subunit of TORC2 membrane-associated complex; involved in regulation of actin cytoskeletal dynamics during polarized growth and cell wall integrity; interacts with Slm1p and Slm2p, homologous PH domain-containing TORC2 substrates; BIT2 has a paralog, BIT61, that arose from the whole genome duplication	-0.10455	0.0723375	0.04721	-0.0103713	-0.01333	0.0264775	-0.108448	-0.170582	0.00649	-0.00291	0.0256125	-0.111644	-0.0906713	-0.0143237	-0.0230237	-0.013065	-0.05698	-0.025365	-0.190896	0.0028325	-0.00154125	0.0387875	-0.055235
YBR271W	EFM2	S-adenosylmethionine-dependent methyltransferase; seven-beta-strand lysine methyltransferase which dimethylates translation elongation factor EF2 (Eft1p and Eft2p) at lysine 613 and methylates EF3 (Yef3p) at lysine 187; green fluorescent protein (GFP)-fusion protein localizes to the cytoplasm; involved in regulation of translational termination; predicted involvement in ribosome biogenesis	-0.062535	-0.0264225	-0.0688375	0.0275025	0.03614	-0.0539575	-0.2541	0.0594363	0.0569913	0.0152312	-0.0676675	0.034825	-0.10698	-0.0596763	-0.00782125	0.0837338	-0.0382863	-0.0884075	0.0015025	-0.051045	0.0350613	0.01759	0.038715	-0.0358925	-0.11273	0.0467163	0.120825	0.01509
YBR273C	UBX7	UBX (ubiquitin regulatory X) domain-containing protein; interacts with Cdc48p; UBX7 has a paralog, UBX6, that arose from the whole genome duplication	-0.0164887	0.0749812	0.0234175	-0.0156638	0.107768	0.01647	0.0379988	0.00663125	-0.0492125	0.0276762	-0.0859825	-0.0190475	-0.0321587	0.0689025	0.0166675	-0.04269	0.0310088	-0.0226037	-0.0384575	-0.060865	0.151271	-0.0266312	0.0159475	0.0983337	0.240271	0.0989212	0.0127587	0.296194
YBR274W	CHK1	Serine/threonine kinase and DNA damage checkpoint effector; mediates cell cycle arrest via phosphorylation of Pds1p; phosphorylated by checkpoint signal transducer Mec1p; homolog of S. pombe and mammalian Chk1 checkpoint kinase	-0.0231613	0.0516337	0.0658287	0.115959	0.02696	-0.0538975	0.0255275	-0.0840837	-0.0580037	-0.01013	0.00205875	-0.03413	-0.07171	-0.025455	-0.0381313	-0.011355	0.163353	-0.0681425	0.0478337	-0.0560338	-0.026795	-0.0960575	-0.0252675	-0.314092	-0.0398625	-0.0203675	0.0198413	-0.0135788
YBR275C	RIF1	Protein that binds to the Rap1p C-terminus; acts synergistically with Rif2p to help control telomere length and establish telomeric silencing; involved in control of DNA replication; contributes to resection of DNA double strand breaks (DSBs); deletion results in telomere elongation	-0.0491075	0.018405	-0.027625	-0.01725	0.004395	-0.0069375	0.107771	-0.0272988	-0.0399438	0.13689	-0.0393763	-0.028635	-0.0528387	-0.01577	0.160495	0.050965	0.0239525	0.0042075	-0.08721	-0.0851625	-0.00028	-0.0236687	-0.151062			0.0667138
YBR276C	PPS1	Protein phosphatase; has specificity for serine, threonine, and tyrosine residues; has a role in the DNA synthesis phase of the cell cycle	0.0729575	0.0690163	0.0531038	-0.102811	-0.06708	-0.00742	0.0341612	0.295843	-0.087785	-0.0749688	0.0285	-0.00263875	-0.0272837	0.00258875	-0.0160375	-0.04389	-0.0198138	-0.0082425	0.001695	-0.0405312	0.00070875	0.0052575	-0.084985
YBR277C		Dubious open reading frame; unlikely to encode a functional protein, based on available experimental and comparative sequence data; partially overlaps the verified gene YBR278W	-0.0850375	-0.0356775	0.0396188	0.123874	0.00389625	0.00257	-0.157468	-0.04971	-0.044545	-0.0468225	0.0313325	-0.0578075	0.020765	-0.019265	-0.049695	-0.045125	-0.059455	-0.054335	-6.93889e-18	-0.027205	-0.03574	-0.0342475	-0.03611
YBR278W	DPB3	Third-largest subunit of DNA polymerase II (DNA polymerase epsilon); required to maintain fidelity of chromosomal replication and also for inheritance of telomeric silencing; stabilizes the interaction of Pol epsilon with primer-template DNA, positively affecting the processivity of the polymerase and exonuclease activities of Pol epsilon; mRNA abundance peaks at the G1/S boundary of the cell cyc…	-0.063565	0.0619312	0.352448	-0.053205	-0.109052	0.109262	-0.0357	-0.00677125	-0.0062875	-0.00793375	-0.0318763	-0.022905	0.0301	0.0041175	-0.0717575	-0.059845	-0.01906	-0.000485	-0.00893	-0.010115	-0.0155987	-0.047145	-0.037655	0.753775	0.510572	0.254843	0.0968287	0.383246
YBR279W	PAF1	Component of the Paf1p complex involved in transcription elongation; binds to and modulates the activity of RNA polymerases I and II; required for expression of a subset of genes, including cell cycle-regulated genes; involved in SER3 repression by helping to maintain SRG1 transcription-dependent nucleosome occupancy; homolog of human PD2/hPAF1	0.149193	-0.0379275	-0.025215	-0.11793	0.906875	0.568152	0.0500662	0.381325	-0.139818	-0.138088	0.0358988	0.0360875	-0.0371425	0.0588575	-0.284722	-0.03903	-0.0287275	0.129188	0.223175	0.38905	-0.0107375	0.0053	-0.06643	0.004155	-0.00491875	0.231662	0.0650787	0.0048675
YBR280C	SAF1	F-Box protein involved in proteasome-dependent degradation of Aah1p; involved in proteasome-dependent degradation of Aah1p during entry of cells into quiescence; interacts with Skp1	0.114196	-0.100301	0.0572125	0.0315513	0.0344513	0.0212225	-0.0647525	-0.0267775	-0.141621	0.079905	0.02636	-0.011295	0.136749	-0.05159	0.035505	0.150677	-0.00669	-0.092025	5.20417e-18	-0.00602	-0.0299375	-0.002385	-0.0322038
YBR281C	DUG2	Component of glutamine amidotransferase (GATase II); forms a complex with Dug3p to degrade glutathione (GSH) and other peptides containing a gamma-glu-X bond in an alternative pathway to GSH degradation by gamma-glutamyl transpeptidase (Ecm38p)	-0.0452238	-0.100271	0.0511025	-0.0381275	-0.0325763	0.0076625	0.01983	-0.0446275	0.0124563	-0.0146263	0.0163788	0.025785	0.0498237	-0.0120575	0.123096	0.0914387	0.0349262	0.0139025	0.0750038	-0.0413575	0.0337425	-0.0446112	-0.0440625	-0.02288	0.148303	-0.0360875	-0.0369975	0.0887275
YBR282W	MRPL27	Mitochondrial ribosomal protein of the large subunit; homolog of human Bcl-2 interacting protein BMRP	0.028025	-0.0821537	-0.00577875	0.0636925	-0.127935	0.017515	0.158601	0.157091	-0.0839838	0.048665	0.05735	0.000125	-0.0672625	-0.0497575	0.001055	-0.020185	0.009525	-0.03213	-0.0670175	0.00806125	0.0277788	0.0277225	-0.04897	-0.123061	-0.0861875	0.08804	-0.159981	-0.258069
YBR283C	SSH1	Subunit of the Ssh1 translocon complex; Sec61p homolog involved in co-translational pathway of protein translocation; not essential	0.0085625	-0.00975625	0.09594	0.0636063	0.107662	-0.0576875	-0.128332	-0.03252	-0.0851575	0.0963325	-0.0097725	-0.117623	0.0572788	0.0184525	0.00329	0.0202525	-0.0218712	-0.0473175	0.170088	0.0588975	0.00787875	0.02248	0.016425	0.187193	1.68196	0.356306	0.325179	-0.029535
YBR284W		Putative metallo-dependent hydrolase superfamily protein; similar to AMP deaminases but lacks key catalytic residues and does not rescue purine nucleotide metabolic defect of quadruple aah1 ade8 amd1 his1 mutant; null mutant exhibits longer telomeres, altered Ty mobility, decreased resistance to rapamycin and wortmannin; induced in response to hydrostatic pressure; not an essential gene; YBR284W …	-0.171164	-0.04494	0.199945	0.0007325	-0.0148625	0.0387738	-0.0527025	-0.140131	0.192019	-0.1274	0.106163	-0.183286	0.01012	0.0592437	-0.18742	-0.427553	-0.138373	-0.106409	-0.199885	-0.0158325	0.054135	-0.215087	0.0390713
YBR285W		Putative protein of unknown function; YBR285W is not an essential gene	0.0325	-0.0265587	0.0125188	0.00349	-0.034465	0.0019525	-0.0446988	0.0660138	-0.00368375	-0.03399	-0.0345675	-0.051525	-0.0233775	0.031155	-0.0688	-0.05476	-0.0128925	-0.0346225	-0.00216	0.0384463	0.00034125	-0.06659	0.0098925
YBR286W	APE3	Vacuolar aminopeptidase Y; processed to mature form by Prb1p	-0.05601	0.0992525	-0.0619975	-0.00968875	0.037275	0.00300375	0.134568	0.078805	0.00077375	-0.0302575	0.0126388	0.0103362	-0.115422	0.03512	-0.00054	-0.0249575	-0.03258	-0.030685	-0.052475	0.0581925	0.00289	0.00991	0.0532188	-0.118222	-0.0690813	0.0462425	0.04577	0.00144
YBR287W		Protein of unknown function; green fluorescent protein (GFP)-fusion protein localizes to the ER; YBR287W is not an essential gene	1.5e-05	-0.0209175	-0.0774563	-0.0547663	0.048765	-0.024465	-0.077415	-0.0705675	-0.0938925	-0.08432	0.0544237	-0.0374125	-0.0014625	0.0107975	0.0245225	0.0078375	-0.0639075	-0.02596	0.0355625	-0.008645	0.0096475	-0.0362825	-0.011865	0.0977813	0.415116	0.0215675	0.364221	-0.12395
YBR288C	APM3	Mu3-like subunit of the clathrin associated protein complex (AP-3); functions in transport of alkaline phosphatase to the vacuole via the alternate pathway	0.129869	0.251248	0.067455	0.0498925	-0.120725	0.0329562	0.08946	0.165704	0.0294638	0.0022575	-0.0231787	0.128497	-0.0155237	-0.101425	-0.05075	-0.0041425	-0.12186	0.0390775	0.20816	0.102365	0.0219	0.069345	0.08217	0.0176	0.0754563	0.108343	0.477596	0.0259681
YBR289W	SNF5	Subunit of the SWI/SNF chromatin remodeling complex; involved in transcriptional regulation; functions interdependently in transcriptional activation with Snf2p and Snf6p; relocates to the cytosol under hypoxic conditions	-0.0565025	-0.116703	-0.131546	-0.0200237	0.0891088	-7.5e-06	-0.142162	-0.299666	0.093635	-0.0205688	-0.0149325	-0.0968875	-0.0406113	-0.144542	-0.0278675	-0.0705725	-0.101758	-0.0600575	-0.0699262	0.01397	0.00231125	-0.0444375	-0.020265	0.632601	0.335303	0.210833	0.180844	0.48401
YBR290W	BSD2	Heavy metal ion homeostasis protein; facilitates trafficking of Smf1p and Smf2p metal transporters to vacuole where they are degraded; acts as an adaptor protein with Rsp5p in the regulated endocytosis of Smf1p and is itself ubiquitylated by Rsp5p; controls metal ion transport, prevents metal hyperaccumulation, functions in copper detoxification	-0.0215413	0.0106737	-0.0193725	0.0338663	0.10509	0.029865	0.176113	0.392257	0.039825	-0.0136262	-0.0165413	0.012565	0.05284	0.0832613	0.008125	0.0421525	0.00421	-0.0299988	-0.0690738	0.00979125	-0.00880125	-0.0220513	-0.0203425	1.17298	0.502481	-0.085215	0.249559	-0.16026
YBR291C	CTP1	Mitochondrial inner membrane citrate transporter; member of the mitochondrial carrier family	0.02658		-0.00839	0.0503313	0.445248	0.0208775	-0.167314	0.03084	0.0245325	0.0353562	0.0680438	0.0298288	-0.07193	-0.105972	-0.00279	0.0237025	0.0621875	0.0232863	-0.099755	0.0101788	0.0077175	0.0538125	-0.01152	-0.339952	-0.111628	0.0698375	0.00635125	-0.01046
YBR292C		Dubious open reading frame; unlikely to encode a functional protein, based on available experimental and comparative sequence data; YBR292C is not an essential gene	-0.0394575	-0.222091	-0.0438175	-0.0266625	-0.102545	-0.0232575	0.0313425	-0.0876725	-0.0268038	-0.0593375	0.11579	0.09507	0.019415	0.0213975	0.045595	-0.0273613	0.0433375	-0.0104975	0.070095	-0.003705	0.0351275	0.0960025	0.036635
YBR293W	VBA2	Permease of basic amino acids in the vacuolar membrane	-0.0675175	0.091535	-0.0250863	-0.00072	-0.0091375	0.020675	-0.000165	0.023885	0.133963	-0.0482275	-0.01992	0.0130525	-0.0106025	0.009755	-0.000885	0.0060175	-0.01079	0.00644	0.00366	0.0069625	0.012215	-0.0109375	-0.002765
YBR294W	SUL1	High affinity sulfate permease of the SulP anion transporter family; sulfate uptake is mediated by specific sulfate transporters Sul1p and Sul2p, which control the concentration of endogenous activated sulfate intermediates	0.0742712	-0.031495	0.0560075	-0.003425	-0.0315138	-0.02904	-0.0475438	0.164821	-0.055135	-0.107575	0.00597875	-0.0284838	0.0639862	-0.03085	-0.0023025	0.00301	-0.002565	-0.0043125	-0.066975	-0.0029075	-0.04028	-0.0976525	-0.0675287
YBR295W	PCA1	Cadmium transporting P-type ATPase; may also have a role in copper and iron homeostasis; stabilized by Cd binding, which prevents ubiquitination; S288C and other lab strains contain a G970R mutation which eliminates Cd transport function	0.0978525	-0.0100538	0.055015	-0.00635625	0.0518412	-0.0409588	-0.03641	0.169174	-0.0701175	-0.142258	-0.0144225	0.102346	0.0689425	-0.0148275	0.02189	-0.02512	-0.0349825	-0.0149263	-0.131775	-0.0379475	0.04383	0.0096175	-0.0620575
YBR296C	PHO89	Plasma membrane Na+/Pi cotransporter; active in early growth phase; similar to phosphate transporters of Neurospora crassa; transcription regulated by inorganic phosphate concentrations and Pho4p; mutations in related human transporter genes hPit1 and hPit2 are associated with hyperphosphatemia-induced calcification of vascular tissue and familial idiopathic basal ganglia calcification	0.067625	0.100124	0.011175	0.0609888	0.33254	-0.11892	0.0708925	0.029815	-0.095875	0.035765	0.024475	-0.0686525	-0.042275	0.002365	0.00134	0.0244675	-0.0246975	-0.12517	0.125551	0.0327525	-0.0603737	-0.00032125	-0.01292	0.0719387	-0.190324	-0.0365412	-0.009685	0.0448925
YBR297W	MAL33	MAL-activator protein; part of complex locus MAL3; nonfunctional in genomic reference strain S288C	0.011895	-0.211646	0.0322838	0.115736	-0.225775	-0.026	-0.126814	-0.0327175	-0.169345	0.0034175	0.030985	-0.0300775	8.5e-05	0.04325	-0.0595875	-0.03171	0.0781225	0.00093875	-0.04255	0.00172	-0.038145	-0.01654	-0.0206375
YBR298C	MAL31	Maltose permease; high-affinity maltose transporter (alpha-glucoside transporter); encoded in the MAL3 complex locus; member of the 12 transmembrane domain superfamily of sugar transporters; functional in genomic reference strain S288C	0.02851	-0.0679037	0.0574825	-0.001235	0.07263	0.0566975	-0.0206712	0.138173	-0.0673375	0.08517	0.0253862	-0.06998	-0.012965	-0.04116	-0.01339	-0.0239975	0.00419	-0.006505	0.00381125	0.0062275	-0.0002025	-0.062505	-0.0594
YBR299W	MAL32	Maltase (alpha-D-glucosidase); inducible protein involved in maltose catabolism; encoded in the MAL3 complex locus; functional in genomic reference strain S288C; hydrolyzes the disaccharides maltose, turanose, maltotriose, and sucrose	-0.0403338	-0.0723425	0.0730438	-0.0294088	-0.0880575	0.00409375	-0.0518238	-0.02285	-0.0064725	-0.0607325	0.0102475	-0.00026	0.038815	0.0462725	0.039375	0.00972	-0.00292	-0.0019	-0.03008	-0.0770825	-0.00999	0.00047	0.0121025
YBR300C		Dubious open reading frame; unlikely to encode a functional protein, based on available experimental and comparative sequence data; partially overlaps the verified gene YBR301W; YBR300C is not an essential gene	0.16071	0.15228	0.01044	0.09966	-0.0273525	-0.0654675	0.029645	-0.109012	0.191318	-0.0228875	0.002225	0.166683	-0.0690738	-0.132977	0.0263675	-0.05142	0.014665	0.00492	-0.086195	-0.0554575	-0.0227275	0.0155325	-0.0996125
YBR301W	PAU24	Cell wall mannoprotein; has similarity to Tir1p, Tir2p, Tir3p, and Tir4p; member of the seripauperin multigene family encoded mainly in subtelomeric regions; expressed under anaerobic conditions, completely repressed during aerobic growth	-0.0001625	0.01422	-0.01288	0.133831	0.08744	-0.0506262	0.0278538	-0.302878	0.00436375	0.0309425	-0.0502325	-0.020745	-0.407152	-0.008445	-0.00904	-0.003365	-0.00091625	0.0385975	-0.520479	0.0206625	-0.02533	0.0983138	-0.0504025
YBR302C	COS2	Endosomal protein involved in turnover of plasma membrane proteins; member of the DUP380 subfamily of conserved, often subtelomeric COS genes; required for the multivesicular vesicle body sorting pathway that internalizes plasma membrane proteins for degradation; Cos proteins provide ubiquitin in trans for nonubiquitinated cargo proteins	0.164319	-0.0105238	0.0693938	-0.0572862	-0.023605	0	-0.017625	0.0103525	-0.075165	0.0373913	-0.0582688	-0.0270025	-0.0224738	0.064575	-0.0240825	0.0338175	-0.00914625	-0.0373075	-0.03867	0.0222925	0.080745	-0.106151	-0.03084	-0.10903	-0.338962	-0.145872	-0.206391	-0.223037
YCL001W	RER1	Protein involved in retention of membrane proteins; including Sec12p, in the ER; localized to Golgi; functions as a retrieval receptor in returning membrane proteins to the ER	0.0666925	-0.0190975	0.03714	-0.0571725	0.03444	-0.029675	-0.106247	-0.058835	0.07498	0.07489	-0.0719625	-0.04139	-0.01352	-0.041815	0.01229	0.0408575	0.0235137	-0.08893	-0.14878	-0.04565	0.108576	0.0212763	0.0050175	0.003535	-0.364497	-0.0604825	-0.127565	-0.016505
YCL001W-A		Putative protein of unknown function; YCL001W-A gene has similarity to DOM34 and is present in a region duplicated between chromosomes XIV and III	0.03665	-0.01553	-0.0075725	-0.010575	0.05759	-0.02035	0.015465	-0.04858	-0.0781513	-0.100328	0.0110487	-0.0366125	-0.00111	-0.03896	-0.0070575	-0.005665	0.0064325	0.017815	0.061345	-0.0441337	0.012925	-0.0600125	-0.00629375
YCL001W-B		Putative protein of unknown function; present in a region duplicated between chromosomes XIV and III; YCL001W-B has a paralog, DOM34, that arose from the whole genome duplication	-0.144424	0.0179525	-0.04122	0.0221725	0.150905	0.00795375	0.0404175	-0.0119238	0.0736187	0.0484375	0.0293062	-0.0194438	-0.0447862	-0.00408625	-0.0195862	-0.0172325	0.0433588	-0.049295	-0.0485775	0.0231175	-0.139654	0.0423162	0.0518788
YCL002C		Putative protein of unknown function; YCL002C is not an essential gene	0.0829825	-0.199148	-0.00751125	-0.102458	0.118993	-0.034305	-0.00173875	-0.13635	0.0434537	-0.07103	-0.023225	-0.0101688	-0.0351075	0.067995	0.0534175	-0.0613325	0.05141	0.0440362	-0.178918	-0.03049	0.0596025	0.068465	-0.058125
YCL004W	PGS1	Phosphatidylglycerolphosphate synthase; catalyzes the synthesis of phosphatidylglycerolphosphate from CDP-diacylglycerol and sn-glycerol 3-phosphate in the first committed and rate-limiting step of cardiolipin biosynthesis	-0.805627			-0.267741			-0.913552	-0.27626			-0.303687	0.1335	0.07404		0.27479	-0.345927		0.214243	-0.0396063				-0.38968
YCL005W	LDB16	Protein involved in lipid droplet (LD) assembly; forms a complex with Sei1p at ER-LD contact sites, stabilizing contact sites; ensures that LDs bud from the ER towards the cytosolic side of the membrane; null mutants have decreased net negative cell surface charge and localized accumulation of phosphatidic acid (PA) marker proteins; GFP-fusion protein expression is induced in response to MMS; nul…	0.0194462	-0.0584525	-0.0454	-0.0407312	-0.137242	-0.0429525	-0.039925	-0.16233	-0.0406613	0.108259	0.0464113	-0.06895	0.00567375	-0.0572163	-0.0043625	0.0464938	-0.04581	-0.0502812	0.00795375	0.0632975	0.0473862	0.00570875	-0.04169	-0.256207	0.161265	0.0154775	-0.157521	-0.0549925
YCL007C		Dubious open reading frame; unlikely to encode a functional protein, based on available experimental and comparative sequence data; overlaps verified ORF YCL005W-A; mutations in YCL007C were thought to confer sensitivity to calcofluor white, but this phenotype was later shown to be due to the defect in YCL005W-A	0.16535	0.255224	0.46437	0.126476	-0.271697	0.0922763	0.239819	-0.274792	-0.143302	0.0684238	-0.232698	0.0987725	0.173792	-0.030675	-0.0623563	0.110886	0.03569	0.196111	0.256979	0.0898375	-0.608503	-0.372159	0.064105
YCL009C	ILV6	Regulatory subunit of acetolactate synthase; acetolactate synthase catalyzes the first step of branched-chain amino acid biosynthesis; enhances activity of the Ilv2p catalytic subunit, localizes to mitochondria	0.01685	0.0960862	-0.00956	-0.0258075	0.105864	-0.0103862	-0.0660925	-0.013705	0.091785	0.0189113	0.0424988	-0.0185262	-0.0224187	-0.0109963	-0.00809125	0.0103875	-0.0619525	0.016715	0.105579	0.0329938	0.0757238	-0.0788225	0.0167	-0.01196	0.005835	-0.0485913	0.042395	0.00347625
YCL010C	SGF29	Component of the HAT/Core module of the SAGA, SLIK, and ADA complexes; HAT/Core module also contains Gcn5p, Ngg1p, and Ada2p; binds methylated histone H3K4; involved in transcriptional regulation through SAGA and TBP recruitment to target promoters and H3 acetylation	-0.0466538	-0.04843	0.0850375	-0.116098	1.15285	0.12689	0.178893	0.521085	0.223376	0.47186	-0.105307	0.0662825	0.38762	0.458056	0.018765	-0.0917262	0.234795	-0.038385	0.20668	0.0813925	0.194392	0.0666575	0.1051	0.342452	-0.124145	0.138983	-0.0599125	-0.0961712
YCL011C	GBP2	Poly(A+) RNA-binding protein; key surveillance factor for the selective export of spliced mRNAs from the nucleus to the cytoplasm; preference for intron-containing genes; similar to Npl3p; also binds single-stranded telomeric repeat sequence in vitro; relocalizes to the cytosol in response to hypoxia; GBP2 has a paralog, HRB1, that arose from the whole genome duplication	0.222191	-0.0476875	0.0346975	0.02892	-0.0935337	0.0281062	-0.165944	0.0282037	-0.0455287	0.0680262	0.01078	0.0122175	-0.0300587	0.0234088	0.0933825	0.0338375	-0.0215263	0.118513	-0.0110212	-0.0208575	-0.082115	0.003515	0.061415	0.275954	0.0460713	0.127621	0.0664238	0.172964
YCL014W	BUD3	Guanine nucleotide exchange factor (GEF) for Cdc42p; activates Cdc42p in early G1, accounting for the first stage of biphasic activation, with Cdc24p accounting for the second stage in late G1; involved in the Cdc42p-mediated assembly of the axial landmark that dictates the site for the next round of budding, resulting in the axial budding pattern observed in haploids; localizes with septins to t…	-0.021455	-0.04466	-0.00712	0.0243312	-0.0351288	0.02743	0.12028	0.263175	0.0890288	0.117097	0.00459	-0.0278325	-0.020165	0.047095	-0.0557975	-0.04795	0.0298125	0.01065	-0.0406437	-0.0011675	0.020095	-0.01188	-0.00309	-0.104762	-0.118138	-0.0817725	-0.175675	-0.0685063
YCL016C	DCC1	Subunit of a complex with Ctf8p and Ctf18p; shares some components with Replication Factor C; required for sister chromatid cohesion and telomere length maintenance	-0.0473588	-0.0797412	-0.112083	-0.0244637	-0.0515075	0.044465	0.0288512	-0.123229	0.10299	-0.04125	-0.121747	0.0260013	0.079055	0.01182	-0.00013	-0.0264075	0.165275	0.10778	0.138101	0.04002	-0.050565	0.0037975	0.139393	-0.266155	-0.0478637	0.111103	-0.095685	-0.0305787
YCL017C	NFS1	Cysteine desulfurase; involved in iron-sulfur cluster (Fe/S) biogenesis and in thio-modification of mitochondrial and cytoplasmic tRNAs; essential protein located predominantly in mitochondria	0.135901		-0.312225	-0.059835		-0.127456	-0.271724	-0.144788	-0.290391	0.068825	-0.0510537	-0.489374	-0.27743	0.0196975			0.04692	-0.208599	-0.322614	-0.040255	-0.117462	0.0839088	0.0395975	0.654753	0.0014275	0.00469375	0.00794625	-0.234357
YCL021W-A		Putative protein of unknown function; SWAT-GFP and mCherry fusion proteins localize to the vacuole	-0.0199663	0.111702	-0.109152	-0.0445175	-0.163894	0.0144325	0.0270275	0.00907375	-0.106705	-0.0347937	0.0794525	-0.088325	0.005095	-0.0315	0.0839125	0.12967	-0.0490512	-0.079575	-0.02403	-0.075625	0.0370075	0.0303225	-0.00189
YCL022C		Dubious open reading frame; unlikely to encode a functional protein, based on available experimental and comparative sequence data; completely overlaps verified gene KCC4/YCL024W	-0.0498912	-0.067795	-0.0159362	0.034675	0.0440725	-0.030725	0.0314275	-0.0915637	-0.0236762	-0.116569	-0.0367863	0.0527688	-0.0336513	0.00645125	0.00734375	-0.07641	-0.0115975	0.00885625	0.0100925	-0.0130063	0.00570625	0.0356513	0.0564225
YCL023C		Dubious open reading frame; unlikely to encode a functional protein, based on available experimental and comparative sequence data; partially overlaps verified ORF KCC4	-0.049715	0.105565	0.0058	0.0902813	0.0248175	-0.0732363	0.149354	-0.30914	0.0226713	0.0142125	-0.061035	0.0207925	-0.458242	-0.00189	-0.0181775	0.0033775	-0.0705512	0.094245	-0.415944	-0.021465	-0.08046	0.127824	-0.019115
YCL024W	KCC4	Protein kinase of the bud neck involved in the septin checkpoint; associates with septin proteins, negatively regulates Swe1p by phosphorylation, shows structural homology to bud neck kinases Gin4p and Hsl1p; KCC4 has a paralog, GIN4, that arose from the whole genome duplication	-0.0304513	-0.0618363	-0.0218575	-0.0229625	-0.08892	-0.00512875	-0.0296775	-0.0053175	0.0004625	-0.0474388	-0.0002575	-0.025955	0.00246625	0.0229825	-0.057335	-0.0016375	0.0063875	-0.0173487	-0.0678975	-0.00106375	-0.0617775	0.0268712	-0.0124788	-0.155365	0.0646763	-0.230216	-0.0261112	0.067505
YCL025C	AGP1	Low-affinity amino acid permease with broad substrate range; involved in uptake of asparagine, glutamine, and other amino acids; expression regulated by SPS plasma membrane amino acid sensor system (Ssy1p-Ptr3p-Ssy5p); AGP1 has a paralog, GNP1, that arose from the whole genome duplication	0.0219425	-0.0774938	-0.0564475	-0.0260525	-0.117042	-0.05022	-0.137399	-0.160215	-0.05904	0.02003	-0.0834587	-0.0214875	-0.01232	-0.0414375	-0.0060975	-0.02161	-0.128055	-0.0831275	-0.0491962	-0.040905	0.008425	-0.0245875	-0.0752175	0.439959	1.59016	0.205847	0.921506	0.225741
YCL026C-A	FRM2	Type II nitroreductase, using NADH as reductant; mutants are defective in fatty acid mediated repression of genes involved in fatty acid biosynthesis indicative of a role in lipid signaling; involved in the oxidative stress response; transcription induction by cadmium and selenite indicates a possible role in the metal stress response; expression induced in cells treated with the mycotoxin patulin	0.0461613	0.0941063	-0.04036	-0.015195	0.195788	0.0092425	0.06479	0.00672625	0.0127388	0.04348	0.0696937	0.0681313	0.0196075	0.00152	0.05564	-0.00193	-0.04364	0.0189138	0.00779875	-0.00265125	0.0247487	-0.0025925	0.0303075	0.09748	-0.0754325	-0.0115575	-1.09156	-1.09003
YCL027W	FUS1	Membrane protein localized to the shmoo tip; required for cell fusion; expression regulated by mating pheromone; proposed to coordinate signaling, fusion, and polarization events required for fusion; potential Cdc28p substrate	-0.0568012	0.013875	0.0083475	-0.0520925	0.10783	0.00893625	0.0971313	0.0104312	0.0717825	-0.07566	-0.00631	0.0630388	-0.00392875	-0.00811	0.0389087	0.00148125	-0.005615	0.082315	0.0517625	-0.048185	-0.019005	0.03569	0.0118838	-0.180021	-0.0522613	0.021375	-0.0249212	0.0606388
YCL028W	RNQ1	[PIN(+)] prion; an infectious protein conformation that is generally an ordered protein aggregate	0.17923	0.08289	0.130452	-0.0121475	-0.00787	-0.0450212	0.071385	-0.149526	-0.0123962	0.1466	0.0224363	0.02338	0.08057	-0.0920688	-0.01658	-0.01899	0.0822575	0.15143	0.0494013	0.169976	0.194525	0.0283075	0.0281675	-0.036895	0.376756	0.14892	0.149962	0.144682
YCL029C	BIK1	Microtubule-associated protein; component of the interface between microtubules and kinetochore, involved in sister chromatid separation; essential in polyploid cells but not in haploid or diploid cells; ortholog of mammalian CLIP-170	0.00751375	-0.0386612	-0.116519	-0.095105	-0.209459	-0.129099	-0.178402	0.08824	0.0418925	0.0489275	-0.0441675	-0.0111737	-0.115695	0.0399788	0.150959	0.0361962	0.005525	-0.158243	-0.0859638	-0.00376	0.056975	-0.0204163	0.0225975	0.200362	0.248055	0.256478	-0.045485	0.106067
YCL030C	HIS4	Multifunctional enzyme containing phosphoribosyl-ATP pyrophosphatase; phosphoribosyl-AMP cyclohydrolase, and histidinol dehydrogenase activities; catalyzes the second, third, ninth and tenth steps in histidine biosynthesis	-0.0645075	-0.140868	-0.00699	-0.142148	0.235331	-0.0868375	0.189985	0.0718775	-0.0965125	0.00878375	-0.0253363	0.223369	-0.0444825	-0.053955	-0.0312287	-0.02791	0.08673	0.0380837	-0.0505787	0.0288137	-0.023765	0.0123313	-0.0193313	-0.168178	0.090015	-0.14646	-0.11654	-0.0421475
YCL031C	RRP7	Essential protein involved in rRNA processing and ribosome biogenesis; protein abundance increases in response to DNA replication stress	0.0654638	0.026305	0.119685	0.144524	0.921687	0.0140062	0.10242	0.153237	0.0972962	0.0748613	0.255465	0.0777012	0.171305	0.10193	-0.0493125	0.0340375	0.0206288	0.0852425	0.195224	0.43875	0.0677287	0.0971313	0.175666	0.635845	-0.079905	0.138497	-0.0532837	0.411851
YCL032W	STE50	Adaptor protein for various signaling pathways; involved in mating response, invasive/filamentous growth, osmotolerance; acts as an adaptor that links G protein-associated Cdc42p-Ste20p complex to the effector Ste11p to modulate signal transduction	-0.213347	0.338315	0.100994	-0.0524375	0.067055	0.0248338	-0.0523325	0.183015	-0.0026225	-0.0657875	0.0264713	0.150504	-0.0516937	0.130757	-0.236308	-0.018475	-0.205665	-0.0991775	-0.0173038	-0.0780363	-0.0588662	-0.247289	-0.19874	-0.181048	-0.165705	0.01661	-0.148562	0.0071325
YCL033C	MXR2	Methionine-R-sulfoxide reductase; involved in the response to oxidative stress; protects iron-sulfur clusters from oxidative inactivation along with MXR1; involved in the regulation of lifespan	-0.26848	-0.301183	-0.30202	-0.255535	0.178168	0.04394	0.018945	0.09298	0.610637	-0.36696	-0.255645	0.29469	-0.302756	-0.126315	-0.0005375	-0.0138875	-0.0285325	0.25511	-0.470175	-0.0500325	-0.12625	0.07319	0.00552
YCL034W	LSB5	Protein involved in membrane-trafficking events at plasma membrane; interacts with actin regulators Sla1p and Las17p, ubiquitin, Arf3p to couple actin dynamics to membrane trafficking processes; similar structure to GGA family of proteins with N-terminal VHS domain and GAT domain; binds Las17p, which is homolog of human Wiskott-Aldrich Syndrome protein involved in actin patch assembly, actin poly…	-0.06967	0.07545	0.0540938	0.0816825	0.008155	-0.01736	-0.149473	-0.00266875	0.0029425	-0.105235	0.024365	0.125865	-0.16031	0.0229	-0.039395	-0.0195	-0.017335	-0.00576	-0.08979	-0.00993	-0.0254425	-0.0121025	-0.0170588	-0.0866125	-0.0274725	0.05718	0.0197325	0.04894
YCL035C	GRX1	Glutathione-dependent disulfide oxidoreductase; hydroperoxide and superoxide-radical responsive, heat-stable, with active site cysteine pair; protects cells from oxidative damage; GRX1 has a paralog, GRX2, that arose from the whole genome duplication; protein abundance increases in response to DNA replication stress	-0.0375125	-0.017485	-0.104082	0.0366737	-0.111695	-0.0228775	-0.0397762	0.0236638	0.019575	-0.05225	-0.0108363	0.010605	-0.0303375	0.026135	-0.00550875	-0.0293088	0.00185	0.025765	-0.06856	-0.01349	-0.003335	-0.0698263	-0.00448625	0.0391575	0.0930675	0.0741825	0.0047175	-0.0732975
YCL036W	GFD2	Protein of unknown function; identified as a high-copy suppressor of a dbp5 mutation; GFD2 has a paralog, YDR514C, that arose from the whole genome duplication	-0.00733	-0.026605	0.12092	0.0961712	-0.171705	0.00481375	-0.02469	-0.043415	0.00914375	0.01192	0.0107963	-0.0621812	0.077365	-0.006725	-0.06652	-0.0158675	-0.00091	-0.09369	0.025935	-0.020285	-0.013315	0.02731	-0.0222612
YCL037C	SRO9	Cytoplasmic RNA-binding protein; shuttles between nucleus and cytoplasm and is exported from the nucleus in an mRNA export-dependent manner; associates with translating ribosomes; involved in heme regulation of Hap1p as a component of the HMC complex, also involved in the organization of actin filaments; contains a La motif; SRO9 has a paralog, SLF1, that arose from the whole genome duplication	-0.0193825	0.0975475	-0.01368	-0.103942	0.0921575	-0.01291	0.143302	0.103289	0.115303	-0.0522438	0.0739888	0.144973	0.101085	0.0165525	-0.0252975	0.042205	-0.0023125	0.00809375	0.0907175	0.115576	0.00155	-0.0200488	0.037705	-0.29118	0.0548875	0.0301475	-0.065515	-0.0623525
YCL038C	ATG22	Vacuolar integral membrane protein required for efflux of amino acids; required for efflux of amino acids during autophagic body breakdown in the vacuole; null mutation causes a gradual loss of viability during starvation	-0.0675163	0.114499	0.0207975	0.125323	0.306225	0.04133	0.193956	-0.0969825	-0.230886	-0.0221837	-0.148376	0.0279675	-0.0238925	0.0177275	-0.0104975	-0.029825	-0.028005	-0.0495913	0.0645187	0.0220988	-0.0280962	0.00789625	-0.0152425
YCL039W	GID7	Subunit of GID Complex that binds directly to central component Vid30p; GID complex is involved in proteasome-dependent catabolite inactivation of fructose-1,6-bisphosphatase; Gid7p contains six WD40 repeats; computational analysis suggests that Gid7p and Moh1p have similar functions	-0.113865		0.00981625	-0.172561		0.005215	0.061165	0.201005	0.18489	-0.176486	0.247482	0.345382	-0.609795	0.049905			0.01187	0.244025	-0.449415	-0.209687	0.00472125	0.00913	-0.06647	0.100157	-0.0731813	-0.100062	0.04123	-0.06836
YCL040W	GLK1	Glucokinase; catalyzes the phosphorylation of glucose at C6 in the first irreversible step of glucose metabolism; one of three glucose phosphorylating enzymes; expression regulated by non-fermentable carbon sources; GLK1 has a paralog, EMI2, that arose from the whole genome duplication	-0.0254888	-0.0587675	0.0360175	-0.04044	-0.019615	-0.0116162	-0.0352037	0.013725	-0.00828875	-0.0289475	-0.0589913	0.00764625	0.0088025	0.0037125	0.0202425	-0.0152775	0.05008	0.0122238	0.0370913	0.035855	-0.0019975	-0.0102763	0.0302825	-0.04012	0.352825	0.096785	-0.05217	0.0476025
YCL043C	PDI1	Protein disulfide isomerase; multifunctional oxidoreductase of the ER lumen, essential for disulfide bond formation in secretory and cell-surface proteins, processing of non-native disulfide bonds; Ero1p activator; complexes with exomannosidase, Mnl1p to facilitate the recognition of misfolded glycoproteins and the trimming of glycan Man8GlcNAc2 to Man7GlcNAc2 on substrates, thereby accelerating …	-0.121372	0.18264	0.0237737	0.101437	-0.00493	0.0323813	-0.131344	0.731383	0.09786	-0.0173825	-0.0105488	-0.053925	0.016835	-0.0767525	-0.0018275	0.059095	0.046995	-0.062895	0.02922	-0.030235	-0.04102	0.13229	0.0607875	0.30322	-0.0413937	0.303956	0.0054525	-0.00842
YCL044C	MGR1	Subunit of the mitochondrial (mt) i-AAA protease supercomplex; i-AAA degrades misfolded mitochondrial proteins; forms a subcomplex with Mgr3p that binds to substrates to facilitate proteolysis; required for growth of cells lacking mtDNA	-0.00808375	-0.285491	-0.140155	-0.0426762	0.0474	-0.044975	-0.11691	-0.05308	0.113287	0.008865	0.0475975	0.102846	-0.101102	-0.0304337	0.01073	-0.190917	0.155651	0.0644388	0.004725	0.036895	0.0262788	-0.017835	-0.094975	-0.100155	-0.0480875	-0.0449675	-0.147145	-0.046455
YCL045C	EMC1	Member of conserved endoplasmic reticulum membrane complex; involved in efficient folding of proteins in the ER; null mutant displays induction of the unfolded protein response; interacts with Gal80p; homologous to worm H17B01.4/EMC-1, fly CG2943, and human KIAA0090	0.108716	0.0887112	-0.02491	-0.0055225	0.115187	-0.0474925	-0.0153325	0.00108625	7.80626e-18	0.0018325	0.0388512	0.057565	0.07977	-0.0468525	0.0988412	0.0410162	0.00292	-0.0403862	-0.0143138	0.00968	-0.00400375	0.0745025	0.0478037	0.282285	0.4345	0.05348	1.20767	-0.164713
YCL047C	POF1	Nicotinamide mononucleotide-specific adenylyltransferase (NMNAT); catalyzes the conversion of nicotinamide mononucleotide (NMN) to nicotinamide adenine dinucleotide (NAD+); role in the nicotinamide riboside (NR) salvage pathway of NAD+ biosynthesis; involved in NR and NAD+ homeostasis; ATPase involved in protein quality control and filamentation pathways; interacts physically with Kss1p and suppr…	0.0690275	0.0186325	0.064845	0.01482	-0.0358775	-0.00506	-0.052535	-0.0278275	0.0141975	0.03725	0.12302	-0.01986	0.0308087	0.0301075	0.0198475	0.0116363	0.0326225	-0.001695	0.049845	0.033225	0.075175	0.086325	0.243303
YCL048W	SPS22	Protein of unknown function; SPS22 has a paralog, SPS2, that arose from the whole genome duplication; redundant with Sps2p for the organization of the beta-glucan layer of the spore wall	0.0215175	-0.204577	0.0881988	0.11349	-0.02001	0.0394238	-0.0111725	-0.150274	0.0139975	0.00289375	0.0956725	-0.124075	0.069125	-0.100781	0.027205	-0.0111863	-0.0535863	-0.10102	-0.101144	0.04363	0.01397	0.0421188	0.0168713
YCL049C		Protein of unknown function; localizes to membrane fraction; YCL049C is not an essential gene	0.06005	-0.0558237	-0.0578375	0.0320775	0.0577512	0.0309787	0.16001	0.268388	-0.023535	-0.0433287	-0.00576625	0.0551512	0.0377463	0.00010125	0.0147438	0.0184325	-0.012095	0.0283775	-0.0231737	-0.0556388	-0.00736875	0.0826275	0.006545
YCL050C	APA1	AP4A phosphorylase; bifunctional diadenosine 5',5'''-P1,P4-tetraphosphate phosphorylase and ADP sulfurylase involved in catabolism of bis(5'-nucleosidyl) tetraphosphates; catalyzes phosphorolysis of dinucleoside oligophosphates, cleaving substrates' alpha/beta-anhydride bond and introducing Pi into the beta-position of the corresponding NDP formed; protein abundance increases under DNA replicatio…	-0.0506575	0.055395	-0.04679	0.00076625	-0.04367	-0.011195	-0.07501	0.100589	-0.144486	0.0655162	-0.121616	-0.04658	0.025355	0.05966	0.0694237	0.007605	-0.245608	0.0411575	0.157878	0.015115	-0.06731	-0.0265662	-0.0135825	0.146017	0.127125	0.09488	-0.101605	-0.0420675
YCL051W	LRE1	Protein involved in control of cell wall structure and stress response; direct inhibitor of the nuclear Dbf2 related (NDR) kinase Cbk1p-Mob2p; overproduction confers resistance to cell-wall degrading enzymes; exhibits genetic interactions with genes involved in the cell wall integrity pathway; LRE1 has a paralog, HLR1, that arose from the whole genome duplication	-0.04139	-0.00479625	0.0143562	-0.03443	-0.0109075	0.001075	0.101083	-0.0344688	-0.0735288	-0.11263	-0.034925	-0.0432138	0.0782663	-0.03556	-0.00597	0.0248075	0.02168	-0.132611	-0.0352237	-0.0337237	0.068655	-0.0924925	-0.028585
YCL052C	PBN1	Component of glycosylphosphatidylinositol-mannosyltransferase I; essential component; required for the autocatalytic post-translational processing of the protease B precursor Prb1p; localizes to ER in lumenal orientation; homolog of mammalian PIG-X	-0.0094425	-0.218246	0.138437	-0.00842375	-0.0147025	-0.06766	-0.147847	-0.063155	-0.15042	0.0973775	0.03139	-0.10182	0.0947488	0.0089625	-0.0439075	-0.0320675	0.208661	-0.06067	-0.0809925	0.129155	-0.0328637	-0.0620525	-0.067375	0.15253	1.61632	-0.233763	0.401499	-0.0712788
YCL054W	SPB1	AdoMet-dependent methyltransferase; involved in rRNA processing and 60S ribosomal subunit maturation; methylates G2922 in the tRNA docking site of the large subunit rRNA and in the absence of snR52, U2921; suppressor of PAB1 mutants	-0.241109	0.178535	-0.287545	-0.0710825	-0.0890875	0.0173438	-0.274587	-0.113916	0.0105763		0.009245	-0.125929	0.0551575	-0.443529	0.521495	0.03524	-0.31581	0.137914	-0.172765	0.0897175	-0.0250375	-0.171673	-0.0642763
YCL055W	KAR4	Transcription factor required for response to pheromones; also required during meiosis; exists in two forms, a slower-migrating form more abundant during vegetative growth and a faster-migrating form induced by pheromone	0.052785	0.0873325	0.0408625	-0.0145212	-0.200533	0.003295	-0.0735225	0.0533513	0.092535	0.160065	0.0347125	-0.0786412	0.0343075	0.0756513	-0.140371	0.02543	-0.045425	-0.176308	0.0369237	0.0600362	0.0226825	-0.008765	0.094345	0.452653	0.16388	-0.44614	0.0119475	-0.0610863
YCL056C	PEX34	Protein that regulates peroxisome populations; peroxisomal integral membrane protein; interacts with Pex11p, Pex25p, and Pex27p to control both constitutive peroxisome division and peroxisome morphology and abundance during peroxisome proliferation	-0.0906325	-0.010165	-0.012655	0.0754475	0.04502	0.0178725	-0.110475	-0.0955225	-0.00402375	0.0163275	0.0576388	-0.0186125	0.05778	-0.04086	0	0.032645	-0.0222975	-0.0042075	0.0366525	-0.0470588	-0.045295	-0.066265	0.0127587	-0.150897	-0.00934125	0.0156375	0.051585	0.03442
YCL058C	FYV5	Protein involved in regulation of the mating pathway; binds with Matalpha2p to promoters of haploid-specific genes; required for survival upon exposure to K1 killer toxin; involved in ion homeostasis	0.034925	0.03204	0.166625	-0.0507625	0.09719	0.0298463	-0.0436687	0.00659125	0.173264	0.0695338	-0.0448212	-0.0297337	0.0266725	-0.014745	-0.0132125	0.128081	-0.0370825	0.0324212	0.0677787	0.010385	-0.0179	0.0216275	-0.00041625
YCL059C	KRR1	Nucleolar protein required for rRNA synthesis and ribosomal assembly; required for the synthesis of 18S rRNA and for the assembly of 40S ribosomal subunit; essential gene	0.710987	-0.125439	-0.70065	0.0154938	0.504007	-0.0391987	0.590309	0.194209	0.297542	-0.276645	-0.129696	0.646865	-0.120773	-0.0632725	-0.00788	0.0297025	0.743604	0.356456	-0.603749	-0.164727	0.313324	-0.0248	0.0176213	0.123831	-0.246548	-0.327565	-0.0031825	0.189359
YCL061C	MRC1	S-phase checkpoint protein required for DNA replication; couples DNA helicase and polymerase; interacts with and stabilizes Pol2p at stalled replication forks during stress, where it forms a pausing complex with Tof1p and is phosphorylated by Mec1p; defines a novel S-phase checkpoint with Hog1p that coordinates DNA replication and transcription upon osmostress; protects uncapped telomeres; Dia2p-…	0.0197713	-0.082555	0.405803	-0.0535825	-0.0707675	-0.09138	-0.102276	0.0592325	-0.0648425	-0.425759	0.0539188	-0.08764	0.0001325	0.066995	-0.090535	-0.00697125	-0.1152	-0.110266	-0.0961337	-0.0542162	0.00695125	-0.0862675	0.0520463		-0.0162913	0.184685	-0.09706	-0.03477
YCL063W	VAC17	Phosphoprotein involved in vacuole inheritance; degraded in late M phase of the cell cycle; acts as a vacuole-specific receptor for myosin Myo2p; involved in regulation of asymmetric inheritance of aggregated/misfolded proteins and age reset	-0.0680638	0.0749	-0.253485	-9.875e-05	0.128525	0.0334125	-0.0142575	0.22506	-0.00395375	-0.090675	0.0213125	0.042835	-0.0312875	0.0413738	-0.0501575	-0.0282825	-0.194933	0.0221525	0.031405	0.086245	0.00779625	-0.0171375	0.10315
YCL064C	CHA1	Catabolic L-serine (L-threonine) deaminase; catalyzes the degradation of both L-serine and L-threonine; required to use serine or threonine as the sole nitrogen source, transcriptionally induced by serine and threonine	-0.0161962	-0.400467	0.118526	0.00327625	0.11761	-0.0256075	-0.0590625	0.130446	0.162824	-0.155426	0.020145	0.0612775	-0.115124	0.0279513	-0.13214	-0.0187712	-0.323434	-0.0292625	-0.0352937	-0.00483375	-0.111067	-0.007615	-0.120247	-0.044755	-0.0479625	-0.035445	-0.09592	0.0039875
YCL065W		Dubious open reading frame; unlikely to encode a functional protein, based on available experimental and comparative sequence data; overlaps HMLALPHA1	0.0055725	0.0389162	-0.0009525	0.031565	0.0127625	-0.01985	0.195431	0.396942	-0.204637	0.120932	-0.0557588	0.0127812	-0.05556	-0.01593	0.0082925	0.063495	-0.166625	0.06865	-0.115606	-0.0214112	-0.064035	0.0471	0.0849125
YCL066W	HMLALPHA1	Silenced copy of ALPHA1 at HML; ALPHA1 encodes a transcriptional coactivator involved in the regulation of mating-type alpha-specific gene expression	-0.00664625		-0.05484	-0.556732		-0.0090625	0.117536	0.0387687	-0.023755	0.101263	-0.326553	-0.0839663	-0.00609375	0.0683813			-0.0476712	0.0103075	-0.0509575	0.025195	0.0331762	-0.0338663	-0.0817825
YCL068C		Putative protein of unknown function	-0.0160138	-0.137004	-0.032745	-0.04386	0.0360088	0.0615425	0.118056	0.03397	-0.0104625	0.125565	0.122306	-0.00717	-0.0090175	-0.103072	-0.043745	-0.0666088	-0.011565	0.01237	-0.0053925	-0.0159887	-0.164513	0.138606	0.0321113
YCL069W	VBA3	Permease of basic amino acids in the vacuolar membrane; VBA3 has a paralog, VBA5, that arose from a segmental duplication	0.0750075	0.17251	-0.0506925	-0.0313875	-0.0927325	0.0014075	0.0091625	0.117907	0.072465	-0.0877225	0.007585	-0.0140575	-0.0115425	-0.00513	0.044405	-0.0116325	-0.030505	0.00415	0	-0.0368725	0.0592425	-0.000895	-0.0178125
YCL073C	GEX1	Proton:glutathione antiporter; localized to the vacuolar and plasma membranes; imports glutathione from the vacuole and exports it through the plasma membrane; has a role in resistance to oxidative stress and modulation of the PKA pathway; GEX1 has a paralog, GEX2, that arose from a segmental duplication	0.0124225	0.0144025	0.04218	-0.04919	0.0259125	0.00218625	-0.288197	0.0279325	0.0973975	0.0921625	-0.0304087	0.0206087	0.0267525	0.0451838	0.01934	-0.0276687	0.0335375	-0.086265	-0.02294	-0.00449	-0.0711675	0.0734325	-0.0011675
YCL076W		Dubious open reading frame; unlikely to encode a functional protein, based on available experimental and comparative sequence data	-0.0956962	0.0348475	-0.0155725	0.0171775	-0.0307575	0.0196288	0.04977	0.0744988	-0.0183162	-0.00116125	0.04581	-0.0287663	-0.00869	0.0175675	-0.0789388	-0.0368713	0.0572662	0.02867	-0.08611	-0.0647	-0.00542625	-0.0034575	0.0315263
YCR001W		Putative protein of unknown function; conserved among S. cerevisiae strains; YCR001W is not an essential gene	-0.01865	-0.0777438	-0.00781625	0.0572812	-0.038965	-0.00191	0.0674537	-0.195531	0.046935	-0.052215	-0.0055575	0.138334	-0.012975	0.0119925	0.0223575	0.0515888	-0.016735	0.0212325	-0.35866	-0.00601	-0.127312	0.0469725	0.047305
YCR002C	CDC10	Component of the septin ring, required for cytokinesis; septins are GTP-binding proteins that assemble into rod-like hetero-oligomers that can associate to form filaments; septin rings at the mother-bud neck act as scaffolds for recruiting cell division factors and as barriers to prevent diffusion of specific proteins between mother and daughter cells; N-terminus interacts with phosphatidylinosit…	0.29372		0.127625	-0.0673762	0.853715	-0.108533	-0.284605	-0.0620363	-0.241432	-0.279925	-0.04715	-0.237819	0.003245	-0.200389	0.127469	-0.04459	-0.118587	-0.0414375	-0.0556613	0.144736	0.528985	0.029725	-0.127645	0.48285	0.627315	0.222966	0.3651	0.249269
YCR003W	MRPL32	Mitochondrial ribosomal protein of the large subunit; protein abundance increases in response to DNA replication stress	-0.0926962	0.298074	-0.01266	0.0279275	-0.0182537	-0.01039	0.0635462	-0.0154212	-0.0695513	-0.005005	0.020365	0.09053	-0.0268987	0.06261	-0.031565	0.0198425	-0.0223175	0.01703	0.0373475	-0.05814	-0.01832	-0.0117425	0.0246425	0.033185	-0.0061325	-0.253431	0.0368563	0.112281
YCR004C	YCP4	Protein of unknown function; has sequence and structural similarity to flavodoxins; predicted to be palmitoylated; the authentic, non-tagged protein is detected in highly purified mitochondria in high-throughput studies	-0.099135	0.06733	0.501094	-0.0833175	0.0313575	-0.066305	0.041035	0.449996	0.08963	0.00135375	-0.0003275	-0.0035125	0.00311	0.0083	-0.068025	-0.0236375	0.05435	0.0131375	0.0112687	-0.0620725	-0.0522825	0.006705	0.0309	-0.326281	0.0850875	0.0549025	-0.0976125	-0.299465
YCR005C	CIT2	Citrate synthase, peroxisomal isozyme involved in glyoxylate cycle; catalyzes condensation of acetyl coenzyme A and oxaloacetate to form citrate; expression is controlled by Rtg1p and Rtg2p transcription factors; SCF-Ucc1 regulates level of Cit2p to maintain citrate homeostasis; oxaloacetate-dependent positive feedback loop inhibits Cit2p ubiquitination; CIT2 has a paralog, CIT1, that arose from …	0.0673312	0.0139913	0.270002	-0.03816	-0.0191	0.00229875	-0.106991	0.330099	0.10298	0.117944	-0.103541	0.009965	0.117605	0.241473	0.125707	-0.164239	-0.0020225	0.0712125	0.126384	-0.130598	0.0291588	0.00549	0.00421125	-0.06637	0.00051375	0.0483937	-0.0315925	0.0189388
YCR006C		Putative protein of unknown function; conserved among S. cerevisiae strains; YCR006C is not an essential gene	-0.101081	-0.228795	0.573185	0.115233	-0.11958	0.021165	0.0651812	0.533226	0.051435	0.0180225	-0.0641075	-0.00278875	0.0129838	0.147596	0.021375	-5.20417e-18	-0.0498637	0.0053425	0.0184925	-0.0083375	0.0124613	-0.105214	-0.0207675
YCR007C		Putative integral membrane protein; member of DUP240 gene family; SWAT-GFP and mCherry fusion proteins localize to the cell periphery and vacuole; YCR007C is not an essential gene	0.0225925	0.0442225	-0.036865	0.0267575	0.050505	-0.012565	-0.0132325	0.365571	0.04434	0.0268187	-0.0136775	-0.05175	-0.0197225	0.0079525	-0.130562	0.00082	0.10603	-0.018005	-0.0055425	0.0254075	0.02326	-0.0169175	-0.00116
YCR008W	SAT4	Ser/Thr protein kinase involved in salt tolerance; funtions in regulation of Trk1p-Trk2p potassium transporter; overexpression affects the Fe-S and lipoamide containing proteins in the mitochondrion; required for lipoylation of Lat1p, Kgd2p and Gcv3p; partially redundant with Hal5p; has similarity to Npr1p; localizes to the cytoplasm and mitochondrion	0.00397	0.0106	0.0606112	-0.0192	-0.12471	-0.0978375	0.01254	0.0702762	0.0073675	-0.0306125	-0.014345	-0.0156962	-0.0406313	0.0391	-0.0444275	0.0122875	0.051275	-0.02872	0.0334887	-0.070165	0.02064	0.002965	0.0175562
YCR009C	RVS161	Amphiphysin-like lipid raft protein; N-BAR domain protein that interacts with Rvs167p and regulates polarization of the actin cytoskeleton, endocytosis, cell polarity, cell fusion and viability following starvation or osmotic stress	0.0796812	0.268856	0.004695	0.185737	0.245724	-0.026765	-0.0532287	-0.00908	0.18189	0.0671475	-0.149066	0.209432	0.09608	0.0139175	-0.0069425	-0.0383037	0.0446675	0.05165	-0.04261	0.0820687	0.22471	0.0487213	0.0719387	1.38133	1.16934	0.0881975	0.576067	0.536332
YCR010C	ADY2	Acetate transporter required for normal sporulation; phosphorylated in mitochondria; ADY2 has a paralog, ATO2, that arose from the whole genome duplication	0.0274675	0.148902	0.007135	0.0846425	0.0453762	0.0227475	0.021095	0.0147838	-0.0872088	-0.0362987	0.00268	0.072455	-0.02834	-0.027225	-0.00084125	0.0591363	-0.041525	-0.0154775	0.0105188	0.02344	0.01498	0.00106	0.0247975
YCR011C	ADP1	Putative ATP-dependent permease of the ABC transporter family	0.028705	0.0140512	-0.104343	-0.0427312	-0.162635	-0.0025125	-0.033485	0.00586	-0.112937	0.0555025	0.0582375	0.00571	0.0599125	0.0449312	0.0403275	0.0050975	-0.00538875	0.0088275	0.0048025	-0.052095	0.0133175	0.00561375	-0.0768075	-0.11304	0.00217375	0.14867	0.751321	0.386994
YCR012W	PGK1	3-phosphoglycerate kinase; catalyzes transfer of high-energy phosphoryl groups from the acyl phosphate of 1,3-bisphosphoglycerate to ADP to produce ATP; key enzyme in glycolysis and gluconeogenesis	0.118434	-0.0523375	-0.246028	-0.0623988	0.0016825	0.016915	-0.147292	-0.051195	0.00445375	-0.1096	-0.0707425	-0.0662575	0.05034	-0.00507875	0.0722425	0.021075	0.00616	-0.0762325	0.0197675	0.05776	0.0287463	-0.0598975	-0.038915	0.186756	0.0419625	-0.02229	0.00566125	-0.00282
YCR013C		Dubious open reading frame; unlikely to encode a functional protein, based on available experimental and comparative sequence data; transcription of both YCR013C and the overlapping essential gene PGK1 is reduced in a gcr1 null mutant	0.0143925		0.0115312			-0.04957	-0.01	-0.0108212	0.0898275	0.00297	-0.153977	0.0473725	0.01592	-0.092085			-0.01455	-0.01212	0.063295	-0.0430675	-0.013735	-0.0528775	-0.0434525
YCR015C	CTO1	Protein required for cold tolerance; involved in phosphate uptake; YCR015C is not an essential gene	-0.06446	0.05182	0.014405	-0.0255187	-0.037545	0.0056775	-0.0293175	-0.0569525	-0.0386475	-0.060565	0.00713875	0.0187	0.003935	-0.002935	0.11317	-0.0096475	-0.05362	-0.0293363	-0.022145	0.0142825	-0.0639375	0.0159675	0.006865
YCR016W		Putative protein of unknown function; green fluorescent protein (GFP)-fusion protein localizes to the nucleolus and nucleus; predicted to be involved in ribosome biogenesis	-0.0065375	-0.032465	-0.0121725	0.0597325	-0.0754125	-0.0181925	-0.0381712	0.0006075	0.0830875	-0.13447	-0.0375537	0.0413012	0.00579875	0.0175275	0.048885	0.023585	0.0212013	0.118989	-0.0340675	0.0104113	-0.023055	0.0410625	0.0994575	-0.0942675	0.062715	-0.171315	0.0642412	0.151659
YCR017C	CWH43	GPI lipid remodelase; responsible for introducing ceramides into GPI anchors having a C26:0 fatty acid in sn-2 of the glycerol moiety; can also use lyso-GPI protein anchors and various base resistant lipids as substrates; contains 14-16 transmembrane segments and several putative glycosylation and phosphorylation sites; null mutation is synthetically lethal with pkc1 deletion	-0.0127262	8.67362e-19	-0.0931775	-0.0898725	0.263377	-0.02947	0.0199912	-0.106559	-0.10039	-0.115691	-0.0103788	-0.0054225	-0.00645625	-0.00780375	-0.0456737	0.0109312	-0.01737	-0.00841875	-0.00011	-0.00139875	-0.0143438	-0.0154875	-0.03407	0.191031	-0.0684512	-0.217756	-0.149046	-0.04494
YCR018C	SRD1	Protein involved in the processing of pre-rRNA to mature rRNA; contains a C2/C2 zinc finger motif; srd1 mutation suppresses defects caused by the rrp1-1 mutation	0.04928	-0.02106	0.169544	-0.02863	-0.0828175	-0.057145	-0.0512613	0.160958	0.05248	-0.0269313	0.069925	-0.04363	-0.03509	0.0210775	0.165301	-0.00117	0.00828	0.0261775	-0.01929	0.00202	0.0655725	-0.0340475	-0.0633475	-0.307513	-0.0758988	-0.00776125	-0.0773975	-0.124973
YCR018C-A		Putative protein of unknown function; encoded opposite a Ty1 LTR	-0.0792125	0.0456712	-0.0886762	-0.02919	0.0610775	-0.014265	0.0790513	0.115185	-0.04106	-0.023185	0.0397462	0.0308425	-0.0841912	-0.066565	0.03264	0.021405	-0.0878287	0.0422387	-0.041595	0.0007525	-0.117294	0.05357	0.0667925	0.0785087	0.0135125	0.0991875	-0.0216825	-0.0153113
YCR019W	MAK32	Protein necessary for stability of L-A dsRNA-containing particles	0.129128	-0.0517325	-0.292434	-0.0079725	-0.11405	-0.01956	-0.0531338	-0.0117962	-0.00965875	-0.0303575	0.018405	0.0249725	0.0528925	-0.0399275	0.0167237	-0.0137663	-0.0313425	0.014565	0.07532	-0.02149	-0.0078075	0.0371025	0
YCR020C	PET18	Protein of unknown function; has weak similarity to proteins involved in thiamin metabolism; expression is induced in the absence of thiamin	0.02131	-0.0266	-0.0290788	-0.0119975	-0.01781	-0.007565	-0.0497037	-0.138038	0.0200987	-0.0903225	0.03693	0.018225	-0.0170987	-0.114668	0.0895637	0.0218312	-0.0590437	0.0191175	-0.0323587	-0.00781625	0.033315	-0.006525	-0.022465	-0.135167	-0.0956038	0.0609287	-0.133788	-0.11026
YCR020W-B	HTL1	Component of the RSC chromatin remodeling complex; RSC functions in transcriptional regulation and elongation, chromosome stability, and establishing sister chromatid cohesion; involved in telomere maintenance	0.179685	-0.01482	-0.0788225	0.06129	1.12126	-0.0742713	-0.0946038	0.837035	-0.0374475	-0.0346675	0.0208137	-0.0277325	-0.137695	-0.0063925	-0.0331437	0.0270675	0.0679387	-0.0210887	-0.151257	0.090765	0.145456	-0.01816	0.169936	0.00037875	-0.086905	0.0022575	-0.0307625	-0.252531
YCR021C	HSP30	Negative regulator of the H(+)-ATPase Pma1p; stress-responsive protein; hydrophobic plasma membrane localized; induced by heat shock, ethanol treatment, weak organic acid, glucose limitation, and entry into stationary phase	0.0569025	0.0173162	0.0972225	-0.0465412	0.0028525	-0.0534625	-0.06272	0.01461	0.0804725	0.109393	-0.0007475	-0.102428	0.063095	0.0210475	-0.04844	-0.0360188	-0.0617625	-0.12023	0.11203	0.0173438	0.106357	-0.0155625	0.0443625	-0.181195	-0.388923	-0.050785	-0.29967	-0.173437
YCR022C		Putative protein of unknown function; conserved among S. cerevisiae strains; YCR022C is not an essential gene	0.131191	0.05752	0.002995	0.0121225	0.012055	0.0047825	0.00502125	0.178171	0.0207263	-0.04563	0.0605675	0.07368	0.0600238	-0.0145712	0.00494875	-0.0201625	0.101785	0.0373175	-0.0322075	0.00299625	0.02047	0.0075075	0.0261775
YCR023C		Vacuolar membrane protein of unknown function; member of the multidrug resistance family; YCR023C is not an essential gene	-0.0332175	-0.07842	0.0956725	0.106169	0.005315	0.005605	0.0328075	0.266275	0.071595	0.0868575	-0.06206	0.0954525	0.00974	0.0461075	-0.01272	0.0071025	-0.03787	0.0270263	0.0494887	-0.0260525	-0.0450675	0.0010575	0.0713037	-0.00759875	-0.0454725	0.0185512	-0.120534	-0.0877388
YCR024C	SLM5	Mitochondrial asparaginyl-tRNA synthetase	-0.533979	0.0577462	-0.109595	-0.006155	-0.17035	-0.1111	-0.167288	0.297967	-0.306299	-0.002875	-0.0216575		0.17846	-0.103819	0.00529	-0.0161538	0.179346	-0.26766	0.58232	0.09022	0.292368		0.32933	-0.0521825	-0.0969012	-0.220064	-0.0815525	0.165326
YCR024C-A	PMP1	Regulatory subunit for the plasma membrane H(+)-ATPase Pma1p; small single-membrane span proteolipid; forms unique helix and positively charged cytoplasmic domain that is able to specifically segregate phosphatidylserines; PMP1 has a paralog, PMP2, that arose from the whole genome duplication	-0.0882362	0.0261575	-0.0036	0.09448	-0.150078	-0.0017925	0.103015	0.019665	0.07815	-0.0895712	-0.0282875	0.0312137	0.00861875	0.0546638	-0.0237675	-0.089745	-0.096795	0.06829	0.11937	-0.01208	-0.0371775	0.0645625	0.0536225	0.337039	0.465146	0.532118	0.336335	0.434926
YCR025C		Putative protein of unknown function; conserved across S. cerevisiae strains; YCR025C is not an essential gene	0.110672	0.042855	0.0619187	-0.114916	0.0184512	-0.0104075	0.35213	0.23422	-0.14353	-0.0635125	0.00914	-0.058	0.060165	-0.100545	-0.018715	-0.0393075	0.069905	0.0250075	0.161277	-0.0435625	0.0875775	0.02687	0.0802225
YCR026C	NPP1	Nucleotide pyrophosphatase/phosphodiesterase; mediates extracellular nucleotide phosphate hydrolysis along with Npp2p and Pho5p; activity and expression enhanced during conditions of phosphate starvation; involved in spore wall assembly; NPP1 has a paralog, NPP2, that arose from the whole genome duplication, and an npp1 npp2 double mutant exhibits reduced dityrosine fluorescence relative to the s…	0.00861	-0.00032	0.38987	0.002905	0.10568	0.027005	-0.0883088	0.638156	0.0286175	-0.0106775	0.0397375	0.0617775	0.0198175	-0.0094275	0.00745	-0.0731187	-0.0293713	0.0377225	-0.0331625	-0.0180788	0.0024325	-0.0417075	-0.0828975
YCR027C	RHB1	Putative Rheb-related GTPase; involved in regulating canavanine resistance and arginine uptake; member of the Ras superfamily of G-proteins	0.0563162	0.102755	0.0790088	-0.047205	-0.229633	-0.00496625	-0.0037675	0.14592	-0.078085	-0.02407	0.031535	0.0874475	-0.0275913	0.135763	0.0335775	0.0495875	0.029245	0.0605012	-0.154116	0.01109	-0.0312962	0.05954	-0.03556	-0.153051	0.0256175	-0.0594825	-0.0581787	-0.110107
YCR028C	FEN2	Plasma membrane H+-pantothenate symporter; confers sensitivity to the antifungal agent fenpropimorph; relocalizes from vacuole to cytoplasm upon DNA replication stress	-0.0269625	0.0051975	0.02675	-0.020525	-0.138115	-0.00519875	0.157138	0.01305	-0.0575975	-0.022395	-0.00099625	-0.0459813	-0.0279975	-0.0368687	-0.0094575	-0.0141762	0.02118	-0.0046825	0.01909	-0.0304475	0.036675	0.00225	0.02713	0.00227625	-0.382104	-0.220459	0.0900938	0.145574
YCR028C-A	RIM1	ssDNA-binding protein essential for mitochondrial genome maintenance; involved in mitochondrial DNA replication; stimulates utilization by Mip1p DNA polymerase of RNA primers synthesized by Rpo41p	0.0642588	0.14866	-0.0206075	-0.085395	0.026435	0.0767775	0.705211	0.00726625	-0.0447175	0.04028	-0.135602	0.354844	-0.0948212	-0.0868238	-0.287753	-0.104375	0.119421	0.235682	-0.01999	-0.04147	-0.0296837	0.0163212	0.166335	0.0132625	-0.0110887	-0.0429737	0.176364	0.257088
YCR030C	SYP1	Negative regulator of WASP-Arp23 complex; involved in endocytic site formation; directly inhibits Las17p stimulation of Arp23 complex-mediated actin assembly in vitro; may regulate assembly and disassembly of the septin ring; colocalizes and interacts with septin subunits; potential role in actin cytoskeletal organization	-0.0234337	0.110289	-0.0028025	-0.147613	-0.00815625	-0.0256675	0.082165	-0.0223775	7.125e-05	-0.0320788	-0.0262388	0.0188275	0.0123038	-0.0277	-0.102986	-0.0398087	0.0511212	0.0072025	0.0232488	-0.039355	0.0134325	-0.0217863	-0.012835	-0.031175	0.057145	0.0381475	0.0622762	0.0452087
YCR031C	RPS14A	Protein component of the small (40S) ribosomal subunit; required for ribosome assembly and 20S pre-rRNA processing; mutations confer cryptopleurine resistance; homologous to mammalian ribosomal protein S14 and bacterial S11; RPS14A has a paralog, RPS14B, that arose from the whole genome duplication	-0.0776375	-0.037005	0.0516788	0.057545	-0.0583775	0.00870875	-0.0304675	-0.06484	-0.0910663	0.0569262	-0.0745762	-0.0039225	-0.0172725	0.0319563	0.00833625	0.023955	0.165186	0.0261937	-0.139965	-0.123705	-0.0230088	-0.0156662	-0.0273325
YCR032W	BPH1	Protein homologous to Chediak-Higashi syndrome and Beige proteins; both of which are implicated in disease syndromes in human and mouse, respectively, due to defective lysosomal trafficking; mutant phenotype and genetic interactions suggest a role in protein sorting	-0.0084725	-0.047745	-0.0055675	-0.00353625	0.0162237	0.0003025	0.073845	0.0095425	0.0581525	0.0240987	0.0739087	0.120012	0.00676375	-0.0658225	0.0149025	-0.00698125	-0.02149	0.0698775	-0.0894563	-0.0363962	-0.03581	-0.0132625	-0.01082
YCR033W	SNT1	Subunit of the Set3C deacetylase complex; interacts directly with the Set3C subunit, Sif2p; putative DNA-binding protein; mutant has increased aneuploidy tolerance; relocalizes to the cytosol in response to hypoxia	0.0168037	0.0803975	0.0240237	0.00538125	0.168075	0.0581225	0.264856	0.022555	0.0635288	0.0407475	0.0124463	0.0424025	-0.0573987	-0.03939	0.0123575	0.02591	-0.08233	0.0691775	-0.00998	0.0572675	0.106216	0.0218887	-0.00147125	0.189592	-0.204478	-0.0869725	0.0230775	-0.0138925
YCR034W	ELO2	Fatty acid elongase, involved in sphingolipid biosynthesis; acts on fatty acids of up to 24 carbons in length; mutations have regulatory effects on 1,3-beta-glucan synthase, vacuolar ATPase, and the secretory pathway; ELO2 has a paralog, ELO1, that arose from the whole genome duplication; lethality of the elo2 elo3 double null mutation is functionally complemented by human ELOVL1 and weakly compl…	-0.144038	-0.02629	-0.0832762	0.141448	0.0683612	0.0110575	0.027455	0.01612	-0.097175	0.125165	-0.0464	-0.040815	0.0352575	-0.0193425	-0.0228175	-0.0304725	0.021505	0.0023725	-0.05753	0.0056275	-0.055415	-0.0108475	0.06936	1.09346	1.99565	0.0195162	0.841579	1.49039
YCR035C	RRP43	Exosome non-catalytic core component; involved in 3'-5' RNA processing and degradation in both the nucleus and the cytoplasm; has similarity to E. coli RNase PH and to human hRrp43p (OIP2, EXOSC8); protein abundance increases in response to DNA replication stress	-0.137375	0.0425075	-0.00267125	-0.144677	-0.113205	0.0456175	-0.128255	0.325678	-0.0328925	-0.195921	-0.0683062	0.339995	-0.248949	0.465665	-0.143102	-0.032705	-0.110075	0.0483525	0.399735	0.800415	-0.001565	0.258955	-0.0342663	-0.076185	0.0829075	0.166655	-0.0651575	-0.107048
YCR036W	RBK1	Putative ribokinase	-0.681412		-0.130425	-0.395326		-0.190153	-0.0813775	-0.215726	-0.022365	-0.137345	0.18226	-0.230929	0.0693475	0.0680588			0.47157	0.119035	0.00502875	-0.369776	0.081495	0.675065		0.80381	0.285665	-0.199099	-0.13936	-0.205184
YCR037C	PHO87	Low-affinity inorganic phosphate (Pi) transporter; acts upstream of Pho81p in regulation of the PHO pathway; expression is independent of Pi concentration and Pho4p activity; contains 12 membrane-spanning segments; PHO87 has a paralog, PHO90, that arose from the whole genome duplication	-0.0443588	0.033195	-0.088255	0.0799675	0.0319513	0.0315975	-0.0418587	-0.319114	-0.0043025	0.0191025	-0.0382313	0.0539188	-0.0383187	-0.013425	-0.0010175	-0.02127	-0.040565	-0.039045	-0.02678	-0.034195	-0.0143825	0.0904025	-0.0308688	0.272544	-0.123574	0.0176987	-0.276749	-0.063655
YCR038C	BUD5	GTP/GDP exchange factor for Rsr1p (Bud1p); required for both axial and bipolar budding patterns; mutants exhibit random budding in all cell types	-0.010575	-0.00692	0.0701925	0.05982	-0.0592875	0.0219062	-0.108391	0.04689	-0.0206775	-0.12363	-0.0577937	-0.0379712	0.0370137	-0.00569	-0.1751	-0.08464	-0.0113625	-0.0794612	-0.108355	-0.11967		-0.018425	0.038965	-0.0275175	-0.0665125	0.004645	-0.058905	0.02003
YCR038W-A		Dubious open reading frame; unlikely to encode a functional protein, based on available experimental and comparative sequence data; completely overlaps the verified gene BUD5/YCR038C; identified by homology with hemiascomycetous yeast species	0.100657	-0.0030325	0.173453	0.0212125	-0.0651537	-0.0389837	-0.108766	-0.0606413	-0.195869	0.138923	0.142607	-0.0334113	0.0432162	-0.0293813	-0.0168125	-0.0134162	-0.0002425	-0.132901	-0.0333375	0.01849	0.0963437	-0.0602	-0.0179662
YCR039C	MATALPHA2	Homeobox-domain protein; with Mcm1p, represses a-specific genes in haploids; acts with A1p to repress transcription of haploid-specific genes in diploids; one of two genes encoded by the MATalpha mating type cassette	-0.03756	-0.0435362	0.00969375	-0.167961	-0.115778	-0.0630462	-0.10211	-0.159051	-0.0706413	0.01291	-0.0277788	0.0792025	0.016085	0.00467125	0.0452525	0.044385	0.157823	0.02242	2.25e-05	0.0048625	-0.128062	0.0079675	-0.0333388
YCR040W	MATALPHA1	Transcriptional co-activator that regulates mating-type-specific genes; targets the transcription factor Mcm1p to the promoters of alpha-specific genes; one of two genes encoded by the MATalpha mating type cassette	0.0875963	-0.017815	0.033715	-0.104688	0.149414	-0.0676487	0.0452625	-0.0256875	0.00434	0.028725	0.06943	-0.12376	0.01392	0.00957375	0.0275687	0.0599125	0.0428313	0.00068875	0.01958	0.00286375	0.0192688	-0.0189575	-0.030945
YCR042C	TAF2	TFIID subunit (150 kDa); involved in RNA polymerase II transcription initiation	0.0203975	0.0665975	-0.00586	-0.0206612	0.324626	0.167513	0.155693	-0.014475	0.0332288	0.142242	-0.0750225	-0.004285	0.0523	0.050735	-0.0046025	0.0616925	-0.0559125	0.03461	0.0538187	0.0698825	0.002335	0.094125	-0.0127275	0.138667	0.0785775	-0.215405	0.0010925	-0.0033225
YCR043C		Putative protein of unknown function; green fluorescent protein (GFP)-fusion protein localizes to the Golgi apparatus; YCR043C is not an essential gene	-0.03809	0.01974	0.06836	-0.029525	-0.046585	-0.04508	0.210647	-0.082225	-0.0472588	-0.0350075	-0.0106737	-0.015945	-0.0313225	0.0655	-0.0076225	-0.043125	0.018165	-0.0332325	0.13107	0.001665	0.02333	0.0459	0.150835	0.335705	0.508745	0.0451675	0.382122	0.198225
YCR044C	PER1	Protein of the endoplasmic reticulum; required for GPI-phospholipase A2 activity that remodels the GPI anchor as a prerequisite for association of GPI-anchored proteins with lipid rafts; functionally complemented by human ortholog PERLD1	0.146965	0.031125	0.0513113	0.00856625	0.0001025	0.00870625	-0.109702	-0.001035	-0.01889	0.0882488	0.0418487	-0.22365	-0.0342425	-0.103053	0.00196	0.012015	0.11704	-0.137593	-0.02878	-0.0305375	0.08093	-0.116285	-0.0412475	-0.23272	0.280716	0.0352325	0.42	-0.108885
YCR045C	RRT12	Probable subtilisin-family protease; role in formation of the dityrosine layer of spore walls; localizes to the spore wall and also the nuclear envelope and ER region in mature spores	0.0985487	-0.0238837	-0.0198625	0.01675	-0.0693	0.0059	-0.0391825	0.0579975	-0.112626	-0.0899025	0.06312	-0.038425	0.004555	-0.0855412	0.0570225	-0.0180513	-0.00490125	-0.0244688	0.019115	-0.050065	0.0148275	-0.05437	-0.01032
YCR046C	IMG1	Mitochondrial ribosomal protein of the large subunit; required for respiration and for maintenance of the mitochondrial genome	-0.0964387	0.0640625	0.045505	0.04307	-0.0882175	-0.0084675	0.0320887	0.153631	-0.0174975	0.024815	-0.02591	0.0566188	-0.0249438	0.100164	0.0066625	-0.01001	-0.00378125	-0.011955	-0.02241	0.0152275	-0.0112362	-0.118386	0.0291525	0.081375	-0.138057	-0.0703475	-0.09177	-0.087705
YCR047C	BUD23	Methyltransferase that methylates residue G1575 of 18S rRNA; required for rRNA processing and nuclear export of 40S ribosomal subunits independently of methylation activity; diploid mutant displays random budding pattern; functional homolog of human WBSCR22	0.043215	0.0883437	-0.01067	0.0159063	-0.190544	0.0093825	-0.0126038	0.215163	-0.10846	0.00078125	-0.0230662	0.127419	0.0067725	-0.0576625	-0.00483875	0.0905038	-0.312148	0.0166213	0.046395	0.256815	0.0826125	-0.14297	0.0045925	0.760435	-0.907721	0.523288	0.0308475	0.268871
YCR048W	ARE1	Acyl-CoA:sterol acyltransferase; endoplasmic reticulum enzyme that contributes the major sterol esterification activity in the absence of oxygen; ARE1 has a paralog, ARE2, that arose from the whole genome duplication	0.115973		-0.081425	-0.0826787		0.0215	0.173865	-0.0652	0.186532	-0.035675		0.0108025	-0.084185	0.174267	0.04795	-0.153432	0.140723	0.19318	-0.172574	-0.0384225	-0.141516	-0.0149012	-0.02348	-0.213959	-0.0399562	-0.00569125	-0.0446488	-0.0620513
YCR049C		Dubious open reading frame; unlikely to encode a functional protein, based on available experimental and comparative sequence data	0.012745	-0.0700638	0.0673538	-0.006235	0.265838	-0.0368525	0.0588663	-0.152066	0.0523938	0.04477	0.0026075	-0.02222	-0.0028725	-0.0128325	-0.017215	0.01132	-0.0156025	0.0049575	-0.107897	-0.0688488	-0.120209	0.08955	0.0264275
YCR050C		Non-essential protein of unknown function; deletion mutant is synthetically sick or lethal with alpha-synuclein	-0.00274375	0.08785	0.0131925	0.0179062	0.11441	-0.014915	-0.0555125	0.122276	0.122541	-0.0597262	0.0449875	-0.015495	0.0175925	-0.0328763	-0.0218437	0.03902	-0.0440325	-0.0414725	0.137758	-0.0620275	0.0621563	0.0385125	-0.0139988
YCR051W		Putative protein of unknown function; green fluorescent protein (GFP)-fusion protein localizes to the cytoplasm and nucleus; contains ankyrin (Ank) repeats; YCR051W is not an essential gene	0.0959463	-0.124846	0.00797125	0.0626975	-0.0670938	0.02953	-0.114017	0.216011	0.0497525	0.0028375	0.05612	0.0572788	0.0702875	0.0750375	0.0656412	0.0298612	-0.0053625	-0.0261238	0.131099	0.211599	0.0490963	0.116002	0.0195075	0.077715	-0.217884	-0.080065	-0.123871	-0.05396
YCR053W	THR4	Threonine synthase; conserved protein that catalyzes formation of threonine from O-phosphohomoserine; expression is regulated by the GCN4-mediated general amino acid control pathway	0.02121	0.141634	-0.0083425	-0.0209387	-0.166126	-0.0191475	0.06109	0.05923	-0.061535	-0.0100675	-0.0441812	-0.0375025	0.0188075	-0.024935	-0.01887	-0.0921713	-0.001735	0	0	-0.0880875	-0.0140775	-0.001365	-0.0182625	-0.24194	0.0456037	-0.110429	-0.0303812	0.0038
YCR054C	CTR86	Essential protein of unknown function; with orthologs in Ashbya gossypii and Candida albicans; similar to human ATXN10, mutations in which cause spinocerebellar ataxia type 10; codon usage corresponds to that observed for yeast genes expressed at low levels; relative distribution to the nucleus increases upon DNA replication stress	-0.04078	0.0959375	0.0664325	0.0243837	-0.0339713	-0.0154825	0.0320438	0.0139013	-0.03183	-0.0364125	0.00525375	0.0408625	0.03454	0.0427175	-0.008335	-0.0131763	0.00719	0.0150913	0.0501313	0.0274575	0.0264738	0.0140387	0.0192625	-0.0162438	0.0068375	-0.02547	-0.127365	0.024475
YCR057C	PWP2	Conserved 90S pre-ribosomal component; essential for proper endonucleolytic cleavage of the 35 S rRNA precursor at A0, A1, and A2 sites; contains eight WD-repeats; PWP2 deletion leads to defects in cell cycle and bud morphogenesis	-0.00717625	-0.130323	0.0301075	-0.0218225	0.297021	-0.00025125	-0.0391838	0.424032	0.0594063	-0.00972875	-0.00729	0.212539	0.0774037	0.33747	-0.143324	0.0584713	0.053175	0.126463	0.192617	0.81702	-0.025655	0.250439	-0.0261112	-0.0656575	-0.0875125	0.118275	-0.0991512	-0.17341
YCR059C	YIH1	Negative regulator of eIF2 kinase Gcn2p; competes with Gcn2p for binding to Gcn1p; may contribute to regulation of translation in response to starvation via regulation of Gcn2p; binds to monomeric actin and to ribosomes and polyribosomes; ortholog of mammalian IMPACT	0.040905	-0.0729275	0.041535	0.0096325	0.02559	-0.00223	-0.0311325	0.064805	0.0277775	-0.0184775	0.102957	0.03262	0.018265	-0.012565	0.0136325	-0.011355	0.00437	-0.014655	0.0649525	-0.0374475	0.0788675	0.181773	0.228582	0.0092975	-0.00251875	0.15505	-0.11334	-0.098895
YCR060W	TAH1	Component of conserved R2TP complex (Rvb1-Rvb2-Tah1-Pih1); R2TP complex interacts with Hsp90 (Hsp82p and Hsc82p) to mediate assembly of large protein complexes such as box C/D snoRNPs and RNA polymerase II; contains a single TPR domain with at least two TPR motifs; plays a role in determining prion variants	-0.0270025	0.048245	0.0420963	-0.022085	0.100572	0.0027025	-0.0200125	0.0286487	-0.0380537	-0.03554	0.0390175	-0.023475	-0.0150025	0.03446	-0.0036025	-0.000325	-0.0528288	-0.0118775	0.121365	-0.0343512	0.0831738	0.019955	0.0203625	-0.173725	0.0543887	-0.144427	-0.006585	0.0493025
YCR061W		Protein of unknown function; green fluorescent protein (GFP)-fusion protein localizes to the cytoplasm in a punctate pattern; induced by treatment with 8-methoxypsoralen and UVA irradiation	-0.0103775	0.309183	0.0167612	0.0030625	-0.0416362	-0.005265	0.135694	-0.101562	-0.00366875	-0.014425	0.0465513	0.03486	0.020265	0.040715	-0.0066975	0.0198187	-0.03329	0.0013725	-0.016455	-0.0249075	-0.012905	0.0376875	-0.03542	0.185961	-0.0412913	-0.160734	0.012695	-0.109815
YCR063W	BUD31	Component of the SF3b subcomplex of the U2 snRNP; increases efficiency of first and second step pre-mRNA splicing; diploid mutants display a random budding pattern instead of the wild-type bipolar pattern; facilitates passage through G1/S Start, but is not required for G2/M transition or exit from mitosis	-0.110434	0.136655	0.09279	-0.0250525	-0.0873912	0.0672787	-0.0310525	-0.02744	0.03677	0.06176	-0.056555	0.0493575	-0.0319925	-0.0253812	-0.114239	-0.06384	-0.192041	0.136014	-0.0547	-0.0990737	-0.150121	0.02933	0.00916	0.019345	0.00242125	-0.0193125	-0.154853	-0.178207
YCR064C		Dubious open reading frame; unlikely to encode a functional protein, based on available experimental and comparative sequence data; partially overlaps the verified gene BUD31	0.0186	0.0547437	0.06068	-0.103244	-0.0111525	0.00324125	-0.00871875	-0.28011	0.153762	-0.139144	-0.0208825	-0.03127	-0.00267	0.0123975	-0.0116413	0.0693513	-0.0988175	-0.0320887	0.129526	0.00446	0.114702	0.0536363	-0.0128275
YCR067C	SED4	Integral ER membrane protein that stimulates Sar1p GTPase activity; involved in COPII vesicle budding through disassociation of coat proteins from membranes onto liposomes; binds Sec16p; SED4 has a paralog, SEC12, that arose from the whole genome duplication	0.0538725	-0.260672	0.408863	0.01238	0.011355	0.109735	0.08782	0.155424	-0.0342675	-0.01076	0.0504175	0.20237	0.0224075	-0.134318	-0.028635	-0.0444175	-0.08548	-0.030975	-0.028155	0.05061	0.0488425	-0.0427475	0.095385	0.0386012	-0.159798	-0.0604425	-0.0839125	-0.117384
YCR068W	ATG15	Phospholipase; preferentially hydrolyses phosphatidylserine, with minor activity against cardiolipin and phosphatidylethanolamine; required for lysis of autophagic and CVT bodies; targeted to intravacuolar vesicles during autophagy via the multivesicular body (MVB) pathway; required for the maintenance of lipid droplet quantity after the diauxic shift; regulates lipolysis; expression regulated by…	-0.00738	-0.106847	-0.01455	-0.0566125	-0.0715025	0.00914	-0.0399738	-0.0723763	0.0289675	0.229751	0.028215	-0.106593	-0.02449	0.0028225	-0.000105	-0.0227875	-0.0292925	0.0570925	-0.147326	-0.023135	0.08003	0.0691975	0.0399825
YCR069W	CPR4	Peptidyl-prolyl cis-trans isomerase (cyclophilin); catalyzes the cis-trans isomerization of peptide bonds N-terminal to proline residues; has a potential role in the secretory pathway; CPR4 has a paralog, CPR8, that arose from the whole genome duplication	0.007875	-0.20381	-0.458373	-0.01313	-0.0905337	-0.0203725	-0.03472	0.0553137	-0.0180613	0.121836	0.0861225	-0.10801	0.0080425	-0.060625	-0.00167625	-0.0314362	-0.0401625	-0.038185	-0.103851	0.122525	0.0480325	-0.000915	0.0369725	-0.185575	0.0018375	0.07788	-0.009775	-0.03364
YCR071C	IMG2	Mitochondrial ribosomal protein of the large subunit; conserved in metazoa, with similarity to human mitochondrial ribosomal protein MRPL49	-0.0215125	0.0475563	-0.153375	-0.0292537		-0.011175	-0.037395	-0.11819	-0.0614437	-0.0485613	0.0259925	-0.197158	-0.0398075	0.101688	0.051625	-0.00475	-0.0851662	-0.0471738	-0.0105525	-0.0388325	0.0263725	-0.0626963	-0.0444362	0.008865	-0.0395225	-0.147267	-0.007685	-0.013325
YCR072C	RSA4	WD-repeat protein involved in ribosome biogenesis; may interact with ribosomes; required for maturation and efficient intra-nuclear transport or pre-60S ribosomal subunits, localizes to the nucleolus	0.0340962	0.127878	-0.02615	-0.00164	-0.034235	0.0380438	-0.178374	-0.20671	-0.0290863	0.047375	-0.0200838	0.0672713	0.0618875	-0.0062425	-0.009915	0.0434475	0.114975	0.0267387	0.0784112	0.087195	0.0035775	0.0354537	0.0012575
YCR073C	SSK22	MAP kinase kinase kinase of HOG1 mitogen-activated signaling pathway; functionally redundant with Ssk2p; interacts with and is activated by Ssk1p; phosphorylates Pbs2p; SSK22 has a paralog, SSK2, that arose from the whole genome duplication	0.110497	-0.0142375	0.03953	0.0127638	-0.106069	0.00137125	-0.0766625	-0.0742775	0.091525	0.129702	0.01531	-0.0544625	0.0376563	-0.0508762	0.10651	0.022505	-0.0584675	-0.00315625	-0.0588175	-0.05176	0.0278375	0.0605425	0.0002525
YCR073W-A	SOL2	Protein with a possible role in tRNA export; shows similarity to 6-phosphogluconolactonase non-catalytic domains but does not exhibit this enzymatic activity; homologous to Sol3p and Sol4p; SOL2 has a paralog, SOL1, that arose from the whole genome duplication	0.0610962	0.028715	0.0121513	0.02065	0.07849	0.0369725	0.02228	-0.0558437	0.0204637	0.093745	-0.151718	-0.047485	-0.00889625	0.0661375	-0.0596737	0.0421813	0.162433	0.0268675	-0.0448838	0.0073	0.024215	-0.150009	-0.02748	-0.0835987	0.007215	-0.0394912	-0.07526	-0.0287725
YCR075C	ERS1	Protein involved in cystine transport; localizes to the vacuole, plasma membrane and endosome; similarity to human cystinosin, a H(+)-driven transporter involved in L-cystine export from lysosomes and implicated in the disease cystinosis; contains seven transmembrane domains; mutation is functionally complemented by human CTNS	0.00808625	0.00631125	0.0065125	-0.0222388	-0.058485	0.0151125	0.09235	0.139953	-0.02198	-0.0649412	-0.0173387	-0.009195	-0.0326225	0.0393838	0.0158125	0.0202625	0.0732425	-0.0291287	0.0610238	-0.00130375	0.0833612	-0.0224088
YCR076C	FUB1	Proteasome-binding protein; interacts physically with multiple subunits of the 20S proteasome and genetically with genes encoding 20S core particle and 19S regulatory particle subunits; exhibits boundary activity which blocks the propagation of heterochromatic silencing; contains a PI31 proteasome regulator domain and sequence similarity with human PSMF1, a proteasome inhibitor; not an essential …	-0.207391	0.0482288	0.021695	-0.120585		0.002415	0.0254263	-0.01626	-0.139662	-0.278933	0.197199	0.166352	-0.0620325	0.28183	0.0100575	-0.209741	-0.287715	0.017795	-0.125578	-0.0167213	0.201082	-0.0122562	0.0762387
YCR077C	PAT1	Deadenylation-dependent mRNA-decapping factor; also required for faithful chromosome transmission, maintenance of rDNA locus stability, and protection of mRNA 3'-UTRs from trimming; associated with topoisomerase II; binds to mRNAs under glucose starvation, most often in the 3' UTR; functionally linked to Pab1p; forms cytoplasmic foci upon DNA replication stress; phosphorylation by PKA inhibits P …	0.10032	-0.144594	0.102884	0.00177625	0.203845	0.0003825	0.17559	0.215986	0.0554137	0.119353	0.0134325	0.310609	0.00539875	0.270222	0.180902	0.0461338	0.0443863	-0.01206	0.274836	0.449311	-0.0102413	0.113529	0.0238825	0.0442825	-0.0701275	-0.082405	-0.0737925	0.065675
YCR079W	PTC6	Mitochondrial type 2C protein phosphatase (PP2C); has similarity to mammalian PP1Ks; involved in mitophagy; null mutant is sensitive to rapamycin and has decreased phosphorylation of the Pda1 subunit of pyruvate dehydrogenase	0.0752538	0.00655625	-0.01224	0.0264838	-0.00823	-0.0082	-0.0495787	-0.00355	-0.0902125	-0.0373563	0.0059775	-0.110342	-0.0160262	-0.214385	0.121453	0.0307325	-0.128079	-0.0678863	0.0397925	0.0191775	0.0225687	-0.0136638	-0.0271525	-0.104783	-0.033725	-0.172249	0.001555	-0.01395
YCR081W	SRB8	Subunit of the RNA polymerase II mediator complex; associates with core polymerase subunits to form the RNA polymerase II holoenzyme; essential for transcriptional regulation; involved in glucose repression	0.0924025	-0.199577	-0.013845	-0.0421813	-0.119701	-0.0115862	0.0249	-0.01808	-0.02886	-0.118373	0.06531	-0.0111975	-0.0294363	0.0269038	0.002805	-0.0116525	0.0767775	0.158876	-0.053825	0.05961	-0.032205	0.0210975	-0.0381975	-0.004355	-0.0895037	0.0564125	-0.183134	-0.179826
YCR082W	AHC2	Component of the ADA histone acetyltransferase complex; Ahc2p and Ahc1p are unique to the ADA complex and not shared with the related SAGA and SLIK complexes; may tether Ahc1p to the complex	0.025935	-0.09403	0.160605	0.07883	-0.03562	0.0900075	-0.170015	-0.211545	0.132121	0.01006	-0.00838375	-0.133742	0.069825	0.0197075	0.0142375	0.0354175	-0.0072325	0.04022	-0.0174825	0.014055	0.044775	-0.0721325	0.209077	-0.386427	-0.131704	0.159007	-0.0309325	0.089485
YCR083W	TRX3	Mitochondrial thioredoxin; highly conserved oxidoreductase required to maintain the redox homeostasis of the cell, forms the mitochondrial thioredoxin system with Trr2p, redox state is maintained by both Trr2p and Glr1p	0.0824575	0.0688037	-0.116913	0.080375	0.0849325	0.114358	-0.250115	-0.04055	0.161954	0.117248	-0.0429	0.028745	0.0237475	-0.0003575	-0.0305	-0.0438612	0.018815	0.105615	0.01393	0.098895	-0.0175475	-0.0229525	-0.036905	0.168125	0.22536	-0.149617	-0.348208	-0.167478
YCR085W		Putative protein of unknown function; conserved among S. cerevisiae strains; YCR085W is not an essential gene	0.0185175	-0.0549987	0.0829825	0.09667	-0.024705	-0.0299525	0.118584	0.214745	-0.174733	0.13109	-0.0753612	-0.0340813	-0.052215	0.06457	0.0046275	0.053885	-0.162282	0.0486425	-0.0927763	-0.0310838	-0.111965	0.04303	0.107368
YCR086W	CSM1	Nucleolar protein that mediates homolog segregation during meiosis I; forms a complex with Lrs4p and then Mam1p at kinetochores; required for condensin recruitment to the replication fork barrier site and rDNA repeat segregation	0.0709863	-0.001695	0.0445075	0.0811787	-0.10169	-0.0511663	-0.070715	0.140855	0.167811	0.0332037	-0.00771375	0.089135	-0.0419925	-0.0168538	0.00650875	-0.0544975	-0.0182325	0.0285138	-0.0695437	-0.0412387	0.0153013	0.0630537	-0.0549675	-0.0355675	0.0382625	-0.0181175	-0.210021	-0.203044
YCR087C-A		Putative protein of unknown function; green fluorescent protein (GFP)-fusion protein localizes to the nucleolus; YCR087C-A is not an essential gene	-0.092365	0.0326712	-0.0551663	-0.0208037	-0.263943	0.02545	-0.0773	-0.038365	-0.0823263	0.0249487	-0.007735	-0.129417	0.0187775	-0.096595	-0.0205925	-0.13735	0.0304512	-0.121744	-0.144377	-0.118167	0.02604	0.0783037	-0.0442063	-0.265558	-0.0162325	-0.001015	-0.076865	-0.298073
YCR087W		Dubious open reading frame; unlikely to encode a functional protein, based on available experimental and comparative sequence data; partially overlaps uncharacterized gene YCR087C-A; YCR087W is not an essential gene	-0.0151813	0.0911925	0.0455038	-0.0208363	0.170025	0.0082525	-0.07687	-0.06731	0.03365	-0.0393725	-0.0074675	0.0366275	-0.025355	-0.0465675	0.0997737	-0.0486137	0.0101013	-0.0388575	-0.111272	-0.105292	-0.0168163	0.0258475	0.003285
YCR088W	ABP1	Actin-binding protein of the cortical actin cytoskeleton; important for activation of the Arp2/3 complex that plays a key role actin in cytoskeleton organization; inhibits barbed-end actin filament elongation; phosphorylation within its Proline-Rich Regio, mediated by Cdc28p and Pho85p, protects Abp1p from proteolysis mediated by its own PEST sequences; mammalian homolog of HIP-55 (hematopoietic …	0.019915	-0.459855	-0.136981	0.00145625	-0.43761	0.0271775	-0.0229525	0.234371	-0.0334288	-0.107417	-0.050655	-0.0426288	-0.0325688	-0.163011	0	-0.01358	-0.099985	-0.134534	-0.0752775	-0.085575	0.204584	-0.0239125	0.07411	0.038105	0.143847	0.0254312	0.0152263	0.00216625
YCR089W	FIG2	Cell wall adhesin, expressed specifically during mating; may be involved in maintenance of cell wall integrity during mating; FIG2 has a paralog, AGA1, that arose from the whole genome duplication	-0.0189275	0.204583	-0.0381375	-0.0317487	-0.0748962	-0.0445925	0.0139925	0.0371075	-0.0028675	0.0894962	-0.00151375	0.015455	0.0401762	-0.0435225	0.002985	-0.0391512	-0.050985	-0.02166	-0.0560438	-0.168729	-0.0578025	-0.03715	0.04568
YCR090C		Putative protein of unknown function; green fluorescent protein (GFP)-fusion protein localizes to the cytoplasm and nucleus; YCR090C is not an essential gene	-0.0785262	-0.00093375	-0.0371425	-0.0323475	-0.0348788	-0.00744	0.119719	0.0481787	-0.0100687	0.044175	-0.01941	0.038785	-0.0415162	-0.0204875	-0.0241	0.0047875	-0.0272625	0.0253375	-0.09532	-0.0898825	0.001815	0.01918	-0.0421975	0.14344	-0.0365575	0.060605	-0.132771	-0.161654
YCR092C	MSH3	Mismatch repair protein; forms dimers with Msh2p that mediate repair of insertion or deletion mutations and removal of nonhomologous DNA ends, contains a PCNA (Pol30p) binding motif required for genome stability	0.0214188	-0.110861	-0.0025075	0.0288137	0.0520475	-0.0179975	-0.115279	0.07203	0.0425025	0.0370863	0.0154488	-0.0777287	0.0056925	-0.05893	0.0496575	-0.01858	-0.034775	-0.0389637	-0.0297275	-0.0327925	-0.00767875	0.02207	-0.022475	-0.122402	-0.0632937	-0.0100112	-0.0147338	-0.0149362
YCR093W	CDC39	Subunit of the CCR4-NOT1 core complex; this complex has multiple roles in the regulation of mRNA levels including regulation of transcription and destabilization of mRNA by deadenylation; basal transcription factor that increases initiation and elongation; activates the ATPase activity of Dhh1p, resulting in processing body disassembly	0.0620225	-0.117525	0.06918	0.03027	0.058505	0.0985175	-0.0301588	-0.0846738	0.0738937	-0.252638	0.0874863	-0.30435	0.0350312	-0.0926775	-0.08321	0.146338	-0.0440325	0.0284875	0.0953425	0.105103	0.262373	-0.178254	0.0428575	0.110521	0.0197338	-0.256081	0.0026825	-0.0351812
YCR094W	CDC50	Endosomal protein that interacts with phospholipid flippase Drs2p; interaction with Cdc50p is essential for Drs2p catalytic activity; mutations affect cell polarity and polarized growth; similar to Lem3p; CDC50 has a paralog, YNR048W, that arose from the whole genome duplication	0.0827587	-0.156124	0.0600525	0.00715875	0.205723	0.0001425	0.0368013	0.136354	0.0059975	0.05272	0.0279375	0.177981	-0.0001725	0.356425	-0.12345	0.0054775	0.03989	-0.0453025	0.452479	1.1154	-0.0398675	0.097495	-0.04992	0.0992725	-0.018375	-0.06777	0.0518825	0.009885
YCR095C	OCA4	Cytoplasmic protein required for replication of Brome mosaic virus; S. cerevisiae is a model system for studying replication of positive-strand RNA viruses in their natural hosts	-0.282269	0.0652075	-0.12346	0.079925	-0.0567175	-0.0186125	-0.0786263	-0.0021575	-0.0847425	-0.173478	0.0449512	0.08315	0.0206275	0.011075	-0.0437125	-0.05191	0.06606	-0.0574025	-0.0827375	-0.0842787	-0.0944475	-0.0129012	-0.0685412	-0.05195	-0.214445	0.0111225	0.075675	-0.04225
YCR096C	HMRA2	Silenced copy of a2 at HMR; similarity to Alpha2p; required along with a1p for inhibiting expression of the HO endonuclease in a/alpha HO/HO diploid cells with an active mating-type interconversion system	0.0296462	0.374572	-0.024245	0.097725	0.032475	0.0229	0.180624	0.171214	-0.0659638	-0.04728	-0.04828	0.01831	-0.0294438	0.00174875	-0.0260688	-0.0699475	0.01071	0.055785	0.05716	-0.0467887	0.117805	0.0793725	0.0046875
YCR097W	HMRA1	Silenced copy of a1 at HMR; homeobox corepressor that interacts with Alpha2p to repress haploid-specific gene transcription in diploid cells	-0.0108	0	0.025065	0.0021275	-0.202838	0.02922	-0.0081925	0.0196325	-0.0903175	0.0024875	0.02549	0.00955	0.0363137	0.0601975	-0.01238	0.018345	0.05075	0.00948	-0.0069175	-0.0204575	0.036395	-0.0971225	-0.0116
YCR097W-A		Dubious open reading frame; unlikely to encode a functional protein, based on available experimental and comparative sequence data; identified by homology to a hemiascomycetous yeast protein	0.05316	-0.01538	-0.251097	-0.0686575	-0.111596	0.03143	0.117352	0.121394	-0.01765	0.0779537	0.0998688	0.0994125	0.0462788	0.108741	0.0460525	0.0157875	-0.0431812	0.09511	0.0818212	-0.01947	-0.03128	0.0340525	-0.0466675
YCR098C	GIT1	Plasma membrane permease; mediates uptake of glycerophosphoinositol and glycerophosphocholine as sources of the nutrients inositol and phosphate; expression and transport rate are regulated by phosphate and inositol availability	-0.0351688	-0.02527	-0.0496575	0	-0.0830525	0.0267263	0.0685287	0.0519862	-0.0186025	0.0398825	0.004335	0.0276463	-0.0737262	0.01409	0.0153762	-0.0218363	-0.0506725	0.0177825	-0.035805	-0.0331475	-0.025105	0.0161	-0.0361288
YCR099C		Putative protein of unknown function	0.0634325	0.119586	0.439919	-0.0443462	-0.037305	-0.0382675	0.0412175	0.683465	-0.00281625	-0.0216838	0.002835	-0.05854	0.008635	-0.02592	-0.00011	0	0.0380537	-0.0429513	0.04822	-0.021825	0.10993	0.00080625	0.0177987
YCR100C		Putative protein of unknown function	-0.0497438	0.039555	-0.045105	0.0623487	0.115778	0.01326	0.0435475	0.00801625	-0.0272788	-0.0926937	-0.0627812	-0.0672088	0.0050725	-0.0188437	-0.0525213	0.0302688	0.0429587	-0.048085	0.00342875	-0.0799113	-0.0217112	0.0146687	-0.005215
YCR101C		Putative protein of unknown function; localizes to the membrane fraction; YCR101C is not an essential gene	-0.0453375	0.0249063	-0.05592	-0.0327025	-0.107548	-0.02884	0	-0.0221362	0.0012675	-0.0229938	0.0104838	0.0494075	0.0276925	-0.026755	-0.01206	-0.03361	-0.0082175	-0.00319	0.026395	-0.058965	-0.0160988	0.020335	0.005035
YCR102C		Putative protein of unknown function; involved in copper metabolism; similar to C. carbonum toxD gene; member of the quinone oxidoreductase family	-0.0933675	-0.0657563	-0.0178887	0.0632575	-0.0399287	-0.005545	0.0263925	0.0565013	-0.0789275	-0.0136113	0.0309862	0.0533312	-0.00631	0.005225	-0.215191	-0.0860575	-0.0156337	0.01525	0.00968375	-0.0019025	-0.0203487	-0.0629163	-0.122564
YCR102W-A		Dubious open reading frame; unlikely to encode a functional protein, based on available experimental and comparative sequence data	-0.0423125	-0.0403637	-0.0271025	-0.0234	-0.0392313	-0.0017475	0.090515	0.139541	-0.128328	-0.039545	0.00103375	-0.03954	-0.0535088	0.01846	0.0312475	0.0063325	-0.0935638	-0.0583275	-0.009425	-0.0241875	-0.0546725	-0.0209825	-0.0538112
YCR104W	PAU3	Member of the seripauperin multigene family; encoded mainly in subtelomeric region; active during alcoholic fermentation; regulated by anaerobiosis; negatively regulated by oxygen; repressed by heme	-0.01725	0.305048	0.105479	0.1469		-0.0934525	0.0410437	0.156625	-0.0148825	-0.0138462	0.0339725	0.00858125	-0.0619862	0.0143125	0.0117025	0.0563075	-0.085505	-0.0013125	0.081505	-0.02975	0.0272625	-0.01981	-0.01153
YCR105W	ADH7	NADPH-dependent medium chain alcohol dehydrogenase; has broad substrate specificity; member of the cinnamyl family of alcohol dehydrogenases; may be involved in fusel alcohol synthesis or in aldehyde tolerance	0.04905	-0.203579	0.03829	0.0269125	-0.072165	-0.0833675	0.02615	-0.300567	-0.00788875	-0.0630688	0.0048775	-0.172162	-0.145995	-0.0523087	-0.0917238	0.0289263	0.0648625	-0.0288275	0.0770012	-0.01166	-0.0734675	-0.0353588	-0.0052525
YCR106W	RDS1	Putative zinc cluster transcription factor; involved in conferring resistance to cycloheximide	-0.0087075	-0.181097	0.0176213	-0.0300475	0.00359	-0.0240863	-0.0703187	0.0404537	0.0354875	-0.048035	0.0456	-0.128736	-0.0291637	-0.0399987	0.0698975	-0.0455062	0.004115	-0.0163925	-0.06132	-0.0129812	-0.0117062	0.0143325	-0.0542275
YCR107W	AAD3	Putative aryl-alcohol dehydrogenase; similar to P. chrysosporium aryl-alcohol dehydrogenase; mutational analysis has not yet revealed a physiological role; AAD3 has a paralog, AAD15, that arose from a segmental duplication; members of the AAD gene family comprise three pairs (AAD3 + AAD15, AAD6/AAD16 + AAD4, AAD10 + AAD14) whose two genes are more related to one another than to other members of t…	0.184861	0.0149675	-0.165216	-0.0465537	-0.102218	-0.0200975	0.0375175	0.0155563	-0.0370938	0.0986788	0.12984	0.020305	0.0561388	-0.0425912	0.0162825	0.0518738	-0.0307737	-0.05962	-0.00010625	-0.0290462	0.0506575	-0.01745	-0.061985
YDL001W	RMD1	Cytoplasmic protein required for sporulation	0.113461	0.0451037	1.32465	-0.0317388	0.26694	-0.115413	0.422995	-0.305135	-0.2734	-0.156392	0.011815	-0.125006	-0.200153	-0.202554	-0.38457	0.03563	-0.125436	0.0435137	-0.118657	0.0690975	0.00139375	0.027745	-0.043515	1.60217	0.140903	0.660784	0.126435	0.157053
YDL002C	NHP10	Non-essential INO80 chromatin remodeling complex subunit; preferentially binds DNA ends, protecting them from exonucleatic cleavage; deletion affects telomere maintenance via recombination; related to mammalian high mobility group proteins	0.10237	0.152699	0.118954	0.0909387	0.44881	0.173271	0.096995	0.116019	-0.114761	0.0404825	0.0178738	-0.07061	0.177943	-0.106254	-0.0227575	0.045795	-0.152963	-0.030445	-0.098955	0.285448	0.0460425	0.0287025	0.0338562	-0.131038	0.000335	0.0106775	-0.0579187	0.0176462
YDL003W	MCD1	Essential alpha-kleisin subunit of the cohesin complex; required for sister chromatid cohesion in mitosis and meiosis; apoptosis induces cleavage and translocation of a C-terminal fragment to mitochondria; expression peaks in S phase	-0.005615	-0.04827	0.04899	-0.0161312	1.92984	0.227282	0.157521	0.366021	-0.02934	-0.054175	-0.0340437	-0.04843	0.0552925	0.0984875	-0.25635	-0.0309213	0.015795	0.193171	0.0436563	0.519445	0.0490737	0.0929888	-0.0426225	0.20503	-0.190287	0.231004	0.280624	0.095695
YDL004W	ATP16	Delta subunit of the central stalk of mitochondrial F1F0 ATP synthase; F1F0 ATP synthase is a large, evolutionarily conserved enzyme complex required for ATP synthesis; F1 translationally regulates ATP6 and ATP8 expression to achieve a balanced output of ATP synthase genes encoded in nucleus and mitochondria; phosphorylated	-0.00211625	-0.11065	0.00209	0.01722	0.021985	-0.125647	0.0253075	-0.022235	0.083895	-0.0395662	0.0428925	0.0593062	-0.0257138	0.113391	-0.10616	-0.0631	0.02591	0.0638875	0.0029225	-0.0171575	0.023395	0.0903575	0.201157
YDL005C	MED2	Subunit of the RNA polymerase II mediator complex; associates with core polymerase subunits to form the RNA polymerase II holoenzyme; essential for transcriptional regulation; relocalizes to the cytosol in response to hypoxia	0.19438	0.169675	0.51693	0.0273462	2.01486	0.490831	-0.0870488	0.599654	0.384739	0.303596	-0.0918838	0.0465887	0.579544	0.58809	0.0716212	0.0932125	0.0784663	0.0291612	0.812093	1.13039	-0.02093	0.207734	0.114141	1.23327	0.16203	0.276857	0.472925	0.377389
YDL006W	PTC1	Type 2C protein phosphatase (PP2C); dephosphorylates Hog1p, inactivating osmosensing MAPK cascade; involved in Fus3p activation during pheromone response; deletion affects precursor tRNA splicing, mitochondrial inheritance, and sporulation	-0.091705	-0.272342	-0.21101	-0.0728425	0.889016	0.0557975	0.098435	-0.040535	-0.101419	-0.226015	0.147292	0.018415	-0.0565325	-0.01354	-0.0159838	0.036035	-0.061375	0.119163	-0.0371187	-0.0834625	0.069815	0.151042	0.0192275
YDL007W	RPT2	ATPase of the 19S regulatory particle of the 26S proteasome; one of six ATPases of the regulatory particle; involved in the degradation of ubiquitinated substrates; required for normal peptide hydrolysis by the core 20S particle; N-myristoylation of Rpt2p at Gly2 is involved in regulating the proper intracellular distribution of proteasome activity by controlling the nuclear localization of the 2…	-0.0353337	-0.246685	-0.00637	0.0444	-0.00426875	-0.0685637	0.520784	-0.292556	-0.11605	-0.292942	-0.02227	-0.061285	-0.231785	-0.0893975	-0.356652	-0.178897	-0.218786	0.0595087	-0.0580012	-0.0544762	-0.0548112	-0.0719825	-0.206275
YDL009C		Protein of unknown function; mRNA identified as translated by ribosome profiling data; SWAT-GFP and mCherry fusion proteins localize to the cytosol; partially overlaps the verified ORF YDL010W; YDL009C is not an essential gene	0.0512087	-0.08427	-0.0477025	-0.00520875	0.125885	-0.0191425	-0.0624275	0.127814	-0.00458375	-0.0335263	0.0370625	-0.02913	0.044935	-0.0478462	-0.0382687	-0.017205	-0.0376625	-0.125757	0.06563	-0.0291175	0.0695038	0.0041475	-0.00701125
YDL010W	GRX6	Cis-golgi localized monothiol glutaredoxin, binds Fe-S cluster; more similar in activity to dithiol than other monothiol glutaredoxins; involved in the oxidative stress response; GRX6 has a paralog, GRX7, that arose from the whole genome duplication	0.0837312	-0.07781	0.115851	0.0251225	-0.194022	0.025695	-0.0414762	-0.00228875	0.122715	0.0494863	-0.00129875	0.0408437	-0.0354037	0.0322675	0.0034925	0.0059225	0.0100625	-0.0292663	-0.0281962	0.034315	0.0417462	-0.048425	0.01422	-0.111561	-0.0459625	-0.011595	-0.123549	-0.0653425
YDL012C		Tail-anchored plasma membrane protein with a conserved CYSTM module; possibly involved in response to stress; may contribute to non-homologous end-joining (NHEJ) based on ydl012c htz1 double null phenotype; YDL012C has a paralog, YBR016W, that arose from the whole genome duplication	-0.0190175	-0.0437012	-0.0975975	-0.0056525	-0.158625	-0.015845	0.162688	0.173429	0.0257625	-0.0397625	0.0260963	-0.0103975	-0.029065	-0.032055	0.0331075	-0.0006325	-0.02568	-0.021545	-0.0163525	-0.03916	-0.0428675	0.0241525	0.01057	0.0162412	0.0289825	-0.499925	0.153089	0.143271
YDL013W	SLX5	Subunit of the Slx5-Slx8 SUMO-targeted Ub ligase (STUbL) complex; role in Ub-mediated degradation of histone variant Cse4p preventing mislocalization to euchromatin; role in proteolysis of spindle positioning protein Kar9p, and DNA repair proteins Rad52p and Rad57p; forms SUMO-dependent nuclear foci, including DNA repair centers; contains a RING domain and two SIM motifs; associates with the cent…	-0.0447688	0.008275	0.0453312	0.0960612	0.0303925	-0.0301662	0.0938438	0.154032	0.0852625	0.0540875	0.0346675	0.0192875	0.111833	-0.0654525	-0.00474	-0.06763	-0.08561	0.0660175	-0.03161	0.05843	0.00096	0.047335	0.05943
YDL014W	NOP1	Histone glutamine methyltransferase, modifies H2A at Q105 in nucleolus; component of the small subunit processome complex, which is required for processing of pre-18S rRNA; ortholog of mammalian fibrillarin; inviability of the null mutant is functionally complemented by human FBL	0.01059		0.0177038	-0.233191		0.0316787	-0.0686625	0.043975	-0.0001625	0.151374	0.229	0.035555	0.234376	0.0871738			0.0332325	0.00092	0.068765	-0.00828	-0.022165	-0.0660975	-0.0558075
YDL015C	TSC13	Enoyl reductase; catalyzes last step in each cycle of very long chain fatty acid elongation; localizes to ER, highly enriched in a structure marking nuclear-vacuolar junctions; coimmunoprecipitates with elongases Elo2p and Elo3p; protein increases in abundance and relative distribution to ER foci increases upon DNA replication stress; human homolog TECR implicated in nonsyndromic mental retardati…	-0.159791	-0.100696	-0.178936	0.00079625	0.115962	-0.0329762	0.01427	-0.06973	-0.02025	-0.0677725	-0.0156312	0.072695	-0.05869	-0.011675	-0.0315687	0.0186387	-0.0285688	0.109001	0.0249475	-0.067435	-0.107805	-0.0324113	0.0364375	-0.111276		0.0447738	0.651686	0.34622
YDL016C		Dubious open reading frame; unlikely to encode a functional protein, based on available experimental and comparative sequence data; partially overlaps the verified ORF CDC7/YDL153C, the catalytic subunit of a complex that regulates DNA replication	-0.669555		-0.0327925	-0.074065		0.432445	-0.228631	-0.165255		-0.12292	-0.239694	-0.276697	0.111426		0.214235	-0.30619		-0.336375	0.0827975	-0.147613
YDL018C	ERP3	Protein with similarity to Emp24p and Erv25p; member of the p24 family involved in ER to Golgi transport	-0.0964475	-0.269165	0.0248988	0.00903	-0.279303	0.0391613	-0.0354063	0.0761813	-0.0972213	0.04491	-0.0604288	-0.019555	-0.105281	-0.0503613	0.043765	0.0325025	0.156842	0.0923637	-0.162729	0.0144087	-0.145625	-0.059705	0.0601688	-0.0247187	2.08184	0.711165	0.400689	0.059015
YDL019C	OSH2	Member of an oxysterol-binding protein family with seven members; in S. cerevisiae, family members have overlapping, redundant functions in sterol metabolism and collectively perform a function essential for viability; contains FFAT motif; interacts with ER anchor Scs2p at patches at the plasma membrane and at the nuclear envelope; regulated by sterol binding; OSH2 has a paralog, SWH1, that arose…	-0.0330125	-0.03288	0.0188125	-0.03386	0.0319875	0.026525	0.07108	-0.0919963	0.0355675	0.0155487	-0.0481125	-0.0152912	-0.049645	-0.0368175	0.0323575	0.0226088	0.0381725	0.00359125	-0.0581675	0.0101375	-0.096325	-0.027225	0.01785	-0.090585	0.156291	-0.0995287	0.0294562	0.121525
YDL020C	RPN4	Transcription factor that stimulates expression of proteasome genes; Rpn4p levels are in turn regulated by the 26S proteasome in a negative feedback control mechanism; RPN4 is transcriptionally regulated by various stress responses; relative distribution to the nucleus increases upon DNA replication stress	0.0451288	0.05111	0.0357125	-0.0301637	0.12824	-0.069555	0.018745	0.05366	0.001505	0.0929	-0.00852	0.003205	0.0835225	-0.114363	-0.0269275	-0.0196625	0.004905	0.0434713	0.151822	0.0620088	-0.0216388	0.00220625	0.01508	-0.143935	0.0130175	-0.118745	-0.070615	-0.0872737
YDL021W	GPM2	Homolog of Gpm1p phosphoglycerate mutase; converts 3-phosphoglycerate to 2-phosphoglycerate in glycolysis; may be non-functional; GPM2 has a paralog, GPM3, that arose from the whole genome duplication	-0.0187675	0.0595863	-0.015895	0.0555088	-0.20589	0.0544437	-0.00013375	0.0319287	0.012475	-0.102538	0.0396212	0.040325	0.0312825	0.0526175	-0.07058	0.0769375	-0.0848587	0.00200625	0.00794375	-0.135522	-0.0239763	0.0402725	-0.0223138	0.0849762	-0.0818675	-0.131689	0.09036	0.0110025
YDL022W	GPD1	NAD-dependent glycerol-3-phosphate dehydrogenase; key enzyme of glycerol synthesis, essential for growth under osmotic stress; expression regulated by high-osmolarity glycerol response pathway; protein abundance increases in response to DNA replication stress; constitutively inactivated via phosphorylation by the protein kinases Ypk1p and Ypk2p, dephosphorylation increases catalytic activity; for…	-0.0736363	0.158124	-0.0187013	0.03683	-0.055915	0.0309	-0.275019	-0.184435	-0.0891525	-0.0835588	0.0316562	0.025125	0.0244037	0.102835	-0.037645	-0.0288587	-0.0271813	0.01423	-0.02987	0.0098425	0.0622637	-0.0859888	0.0008025	-0.0465325	0.179949	0.0826575	0.36397	0.884853
YDL023C		Dubious open reading frame; unlikely to encode a functional protein, based on available experimental and comparative sequence data; not conserved in other Saccharomyces species; overlaps the verified gene GPD1; deletion confers sensitivity to GSAO; deletion in cyr1 mutant results in loss of stress resistance	0.0117725	-0.191951	-0.120755	-0.10082	-0.140088	-0.0175562	-0.16693	-0.0252938	-0.05938	0.00283125	0.0566538	0.039525	0.137272	-0.220384	0.0111413	0.0457525	0.07002	0.0173375	0.00503125	0.03133	-0.0777975	0.150855	0.05103
YDL024C	DIA3	Protein of unknown function; involved in invasive and pseudohyphal growth	0.252634	-0.119375	-0.013705	-0.005495	0.0251975	-0.0444037	-0.055115	-0.0206687	-0.0709287	0.0181725	-0.0497612	-0.126468	-0.0210238	0.01178	-0.0302075	0.0823375	0.22411	0.0203275	-0.0104225	-0.075345	-0.0213175	-0.0565325	-0.01102
YDL025C	RTK1	Putative protein kinase, potentially phosphorylated by Cdc28p; interacts with ribosome biogenesis factors, Cka2, Gus1 and Arc1; protein abundance increases in response to DNA replication stress	0.440481	-0.025595	0.187278	-0.0589613	-0.024375	0.130501	0.143542	-0.01633	-0.142164	0.0147688	-0.0563	0.0748725	-0.116415	0.07521	0.00937375	0.00701375	-0.239558	0.126222	-0.230598	-0.115339	-0.110528	-0.0874775	-0.0350375	-0.002415	0.0353037	-0.161052	0.03534	0.00249125
YDL027C	MRX9	Protein that associates with mitochondrial ribosome; the authentic, non-tagged protein is detected in highly purified mitochondria in high-throughput studies; YDL027C is not an essential gene	-0.0901238	0.0899725	0.01516	0.0893175	0.175021	0.0248062	0.230951	0.0167438	0.146444	-0.0348588	0.0119075	0.0176475	-0.0641963	-0.0258063	-0.00526	0.009605	0.0675588	-0.0847775	-0.0385687	-0.0100825	-0.0525425	-0.03673	0.025645	-0.0464975	-0.0640787	0.01735	-0.0295888	-0.0715725
YDL028C	MPS1	Dual-specificity kinase; autophosphorylation required for function; required for spindle pole body (SPB) duplication and spindle checkpoint function; contributes to bi-orientation by promoting formation of force-generating kinetochore-microtubule attachments in meiosis I; substrates include SPB proteins Spc42p, Spc110p, and Spc98p, mitotic exit network protein Mob1p, kinetochore protein Cnn1p, an…	-0.0212425	-0.0687325	0.0351875	0.12539	-0.0216063	0.0099875	-0.0374675	-0.08872	-0.0756875	0.0365562	0.0342862	-0.113561	0.0474725	-0.0303075	0.0192637	0.235673	-0.0303975	0.0532837	-0.0733562	0.0651088	-0.0057925	-0.241196	-0.0285063	0.137271	-0.0807225	-0.101821	-0.134021	-0.193141
YDL029W	ARP2	Essential component of the Arp2/3 complex; Arp2/3 is a highly conserved actin nucleation center required for the motility and integrity of actin patches; involved in endocytosis and membrane growth and polarity; required for efficient Golgi-to-ER trafficking in COPI mutants	-0.248379	-0.64312	0.145385	-0.0531		-0.140599	0.387319	-0.105051	-0.497019	-0.300921	-0.0334325	-0.205932	-0.244669	-0.246304	-0.383898	0.164653	0.0347563	-0.0014375	-0.0667912	0.23325	0.337485	-0.21338	-0.071205			0.0488312
YDL030W	PRP9	Subunit of the SF3a splicing factor complex; required for spliceosome assembly; acts after the formation of the U1 snRNP-pre-mRNA complex	0.00979	0.07661	-0.0547238	-0.0129062	0.412672	0.0170775	0.0270025	0.00283375	-0.018265	0.06866	-0.0400125	0.0968038	0.0879837	-0.156559	0.00711375	-0.0012075	-0.133335	-0.019485	0.0872712	0.192933	-0.00623875	-0.02547	-0.0542075	-0.17954	0.00349125	0.00483625	0.012635	-0.001865
YDL031W	DBP10	Putative ATP-dependent RNA helicase of the DEAD-box protein family; constituent of 66S pre-ribosomal particles; essential protein involved in ribosome biogenesis	-0.532431	2.3832	0.0038	-0.112009	1.70819	-0.135357	0.682619	-0.117947	-0.141542	-0.200329	-0.154359		-0.206352	0.210313	-0.412953		0.372202		0.666048		0.557714	0.317785
YDL032W		Dubious open reading frame; unlikely to encode a functional protein, based on available experimental and comparative sequence data; partially overlaps verified gene SLM3/YDL033C; YDL032W is not an essential gene	0.118066	-0.288917	0.0928775	0.0203613	-0.139045	0.01326	-0.0918775	-0.0253263	-0.0631937	0.00143375	0.060815	-0.037175	0.069115	0.00859125	0.0149438	-0.0030775	0.15793	0.0128475	0.01908	-0.0140375	-0.194899	-0.0014575	-0.00352125
YDL033C	SLM3	tRNA-specific 2-thiouridylase; responsible for 2-thiolation of the wobble base of mitochondrial tRNAs; human homolog TRMU is implicated in myoclonus epilepsy associated with ragged red fibers (MERRF), and can complement yeast null mutant	-0.0683837	0.0563125	0.0237325	-0.0628913	0.136462	0.01802	-0.22253	-0.0320875	0.0658713	0.0016275	-0.056005	-0.009475	-0.0658225	0.0594437	0.161823	0.03393	0.0048475	-0.040495	0.0050375	-0.051875	0.0695038	-0.0904975	0.005295	0.0913375	0.0811062	0.0645025	-0.0719238	-0.05617
YDL034W		Dubious open reading frame; unlikely to encode a functional protein, based on available experimental and comparative sequence data; partially overlaps with verified gene GPR1/YDL035C; YDL034W is not an essential gene	0.0405525	-0.0286812	-0.10895	-0.02565	-0.03745	-0.0201025	0.0749537	-0.148065	0.145368	0.082645	0.0222063	-0.0677712	0.0309975	-0.01384	0.0034375	0.00089	-0.0293875	-0.0948525	0.0386138	0.0290613	0.15053	0.061465	-0.0195625
YDL035C	GPR1	Plasma membrane G protein coupled receptor (GPCR); interacts with the heterotrimeric G protein alpha subunit, Gpa2p, and with Plc1p; sensor that integrates nutritional signals with the modulation of cell fate via PKA and cAMP synthesis	-0.0216675	-0.03542	0.00146125	0.0788212	-0.141097	-0.035205	0.0861225	0.0240775	-0.113687	0.114096	0.0096425	0.0399325	0.06417	-0.001135	0.02305	-0.0561025	0.01515	-0.0020125	0.0592813	-0.0384837	0.029945	-0.0492275	-0.03721
YDL036C	PUS9	Mitochondrial tRNA:pseudouridine synthase; catalyzes the formation of pseudouridine at position 32 in mitochondrial tRNAs; contains an N-terminal mitochondrial targeting sequence; PUS9 has a paralog, RIB2, that arose from the whole genome duplication	0.094875	-0.253735	0.07535	-0.0652875	0.107205	-0.0269225	-0.0556875	-0.0135912	0.203313	-0.0429563	0.0450438	0.0439075	0.14501	-0.0641625	0.003905	0.0174425	-0.23227	0.00964875	-0.0455025	0.0841537	-0.0656775	0.0793062	0.0024275	-0.107533	-0.011535	-0.0690825	0.0245513	-0.0119312
YDL039C	PRM7	Pheromone-regulated protein; predicted to have one transmembrane segment; promoter contains Gcn4p binding elements; in W303 strain one continuous open reading frame comprising of YDL037C, the intergenic region and YDL039C encodes the IMI1	0.0478838	-0.048475	0.0969025	0.032005	0.07836	-0.0023475	0.0091775	-0.185227	-0.040415	-0.0329137	0.119127	0.0573938	0.0582237	-0.0180837	0.0057075	0.0268125	-0.00893	-0.0651425	0.02728	0.017035	0.166425	-0.0099325	-0.0169225
YDL039C	PRM7	Pheromone-regulated protein; predicted to have one transmembrane segment; promoter contains Gcn4p binding elements; in W303 strain one continuous open reading frame comprising of YDL037C, the intergenic region and YDL039C encodes the IMI1	0.0478838	-0.048475	0.0969025	0.032005	0.07836	-0.0023475	0.0091775	-0.185227	-0.040415	-0.0329137	0.119127	0.0573938	0.0582237	-0.0180837	0.0057075	0.0268125	-0.00893	-0.0651425	0.02728	0.017035	0.166425	-0.0099325	-0.0169225
YDL040C	NAT1	Subunit of protein N-terminal acetyltransferase NatA; NatA comprised of Nat1p, Ard1p, and Nat5p; N-terminally acetylates many proteins to influence multiple processes such as cell cycle progression, heat-shock resistance, mating, sporulation, telomeric silencing and early stages of mitophagy; orthologous to human NAA15; expression of both human NAA10 and NAA15 functionally complements ard1 nat1 d…	-0.0569863	-0.193722	0.0147775	0.0117062	0.0753425	-0.02691	0.0330387	-0.0377513	0.0004925	0.129485	-0.116392	-0.0182488	-0.0669238	-0.0581475	-0.0467113	-0.0161412	-0.0405338	-0.0267075	0.0145413	-0.0618788	-0.0189738	-0.02326	0.04307	-0.0967125	0.0826525	-0.08721	-0.0781463	0.0694687
YDL041W		Dubious open reading frame; unlikely to encode a functional protein, based on available experimental and comparative sequence data; overlaps the verified gene SIR2/YDL042C	0.0668637	0.0148737	0.0522413	0.0876413	-0.067085	0.002825	0.0310337	0.138155	-0.0125337	-0.0754788	0.0252313	0.0268188	-0.050485	0.122023	-0.03752	-0.0531875	0.0869875	0.145097	-0.0654625	-0.0301812	0.0333188	-0.036605	-0.0007425
YDL042C	SIR2	Conserved NAD+ dependent histone deacetylase of the Sirtuin family; deacetylation targets are primarily nuclear proteins; required for telomere hypercluster formation in quiescent yeast cells; involved in regulation of lifespan; plays roles in silencing at HML, HMR, telomeres, and rDNA; negatively regulates initiation of DNA replication; functions as regulator of autophagy like mammalian homolog …	-0.03391	-0.0811075	-0.122376	0.012375	-0.192211	-0.0333175	-0.231747	-0.0361863	-0.0165488	0.0934237	-0.05208	-0.0123038	0.0148625	-0.0600137	0.0393088	-0.0269838	0.073995	-0.0277562	0.0241363	-0.127244	0.0167625	-0.0440475	-0.0822013	0.03611	-0.120425	-0.027405	-0.028765	-0.125667
YDL043C	PRP11	Subunit of the SF3a splicing factor complex; required for spliceosome assembly	0.102063	0.0960175	-0.0323925	0.102165	-0.0451625	-0.0369075	-0.112251	0.165126	-0.0513738	0.0725512	0.0252087	-0.011615	0.0088975	0.126244	0.0322275	0.02839	-0.00766375	0.00624	-0.070695	-0.022145	0.0749125	0.169455	-0.065865	-0.230189	-0.0205275	0.0568712	-0.0759175	-0.0599263
YDL044C	MTF2	Mitochondrial protein that interacts with mitochondrial RNA polymerase; interacts with an N-terminal region of mitochondrial RNA polymerase (Rpo41p) and couples RNA processing and translation to transcription	-0.0427563	0.0433938	-0.030685	-0.0163812	-0.053805	0.0571975	0.0941788	-0.14867	0.08005	-0.199824	-0.06793	-0.013895	-0.0566038	-0.0315175	0.0973625	-0.002185	-0.147761	-0.0503337	-0.033545	-0.023865	-0.00385625	0.0142638	-0.0299975	-0.187408	-0.107673	-0.0360937	0.071235	0.0289725
YDL045C	FAD1	Flavin adenine dinucleotide (FAD) synthetase; performs the second step in synthesis of FAD from riboflavin; mutation is functionally complemented by human FLAD1	-0.12076	0.20586	-0.0020775	-0.012945	-0.134662	0.0541725	0.060505	-0.0320862	0.0216513	0.022075	0.0652038	0.05787	0.0626375	-0.0259825	-0.03706	-0.104275	-0.0613475	-0.01083	0.0273275	-0.012945	-0.0666988	0.074775	-0.006845	-0.0783325	-0.0014975	0.0324	-0.13704	0.03444
YDL046W	NPC2	Sterol transport protein and functional homolog of human NPC2/He1; human NPC2 is a cholesterol-binding protein whose deficiency causes Niemann-Pick type C2 disease involving retention of cholesterol in lysosomes; yeast NPC2 can complement mutations in human NPC2	0.0242888	-0.07325	-0.0247512	0.00315375	-0.0804325	-0.00196	0.0378125	0.0073475	-0.0808575	-0.000205	-0.0069375	-0.0480725	-0.155048	0.0510125	0.0531413	0.0402238	-0.00437625	-0.0442025	-0.161885	-0.008705	-0.0883437	-0.0063925	-0.090695	0.757463	-0.12366	-0.085845	0.228541	0.233758
YDL047W	SIT4	Ceramide-activated, type 2A-related serine-threonine phosphatase; functions in G1/S transition of mitotic cycle; controls lifespan, mitochondrial function, cell cycle progression by regulating HXK2 phosphorylation; regulator of COPII coat dephosphorylation; required for ER to Golgi traffic; interacts with Hrr25p kinase; cytoplasmic and nuclear protein that modulates functions mediated by Pkc1p in…	0.177681	-0.036165	0.263335	-0.0594162	0.124165	0.0066125	-0.079575	-0.00646875	0.0182687	-0.0473712	0.0620013	-0.0825338	0.0049925	-0.143449	0.0457938	0.117454	-0.150829	-0.071615	0.138231	0.221939	0.150859	-0.0493087	-0.2663	-0.09379	0.179932	0.08494	-0.0976075	-0.127021
YDL048C	STP4	Protein containing a Kruppel-type zinc-finger domain; similar to Stp1p, Stp2p; predicted transcription factor; relative distribution to the nucleus increases upon DNA replication stress; STP4 has a paralog, STP3, that arose from the whole genome duplication	0.0090025	-0.0829925	-0.111224	0.0125875	-0.182165	-0.02007	-0.11765	-0.0276175	-0.144594	-0.11421	0.0486313	-0.0319325	-0.081455	0.001365	-0.0053	-0.048755	0.034325	0.0035675	-0.181512	-0.039845	0.03009	-0.0783775	0.0010075	0.03974	0.005	0.075175	-0.00116125	-0.0617437
YDL050C		Dubious open reading frame; unlikely to encode a functional protein, based on available experimental and comparative sequence data	-0.0523875	-0.344545	-0.0335013	-0.0193637	-0.0445538	0.0083575	-0.109485	-0.03273	0.00766	-0.010285	-0.024395	0.0729775	0.05683	-0.005885	0.14708	0.0562625	-0.02804	-0.000125	0.0359575	0.01256	0.0178675	0.122435	0.041575
YDL051W	LHP1	RNA binding protein required for maturation of tRNA and U6 snRNA; acts as a molecular chaperone for RNAs transcribed by polymerase III; homologous to human La (SS-B) autoantigen	-0.0868325	0.197405	-0.0422675	0.0068125	0.094865	0.01695	0.0507613	0.23269	-0.04529	-0.0646837	0.122953	0.178092	-0.00858875	-0.04676	0.11	0.0205612	-0.289874	-0.0117912	-0.0329975	0.186807	0.178845	8.125e-05	0.0269488	-0.357967	-0.0312287	-0.007395	-0.0448075	-0.02136
YDL052C	SLC1	1-acyl-sn-glycerol-3-phosphate acyltransferase; catalyzes the acylation of lysophosphatidic acid to form phosphatidic acid, a key intermediate in lipid metabolism; enzymatic activity detected in lipid particles and microsomes	-0.122655	-0.0251125	0.0505875	0.0838037	0.0592725	0.0187425	-0.187809	-0.0267375	-0.136057	0.278881	-0.0618387	-0.0389963	-0.05426	-0.07106	0.04069	0.05848	-0.0171475	-0.0282713	-0.0323625	-0.0191287	-0.03648	0.0757175	0.095275	-0.197818	0.965865	0.231877	0.393332	0.168205
YDL053C	PBP4	Pbp1p binding protein; interacts strongly with Pab1p-binding protein 1 (Pbp1p) in the yeast two-hybrid system; also interacts with Lsm12p in a copurification assay; relative distribution to the nucleus increases upon DNA replication stress	-0.0524413	-0.0619613	0.0338325	0.00116	-0.0533788	-0.0022925	-0.103161	0.354316	0.153091	0.06286	0.0116075	-0.03156	-0.0186012	0.0056425	0.0580125	-0.0230675	-0.0067325	0.02665	-0.03898	0.0507925	0.019005	-0.016735	0.027495	-0.076715	0.126505	-0.0124325	0.0607787	-0.0111925
YDL054C	MCH1	Protein with similarity to mammalian monocarboxylate permeases; monocarboxylate permeases are involved in transport of monocarboxylic acids across the plasma membrane but mutant is not deficient in monocarboxylate transport	0.02613	-0.00688	-0.0143562	0.0725988	-0.04196	0.0287587	0.014795	-0.03063	0.0036725	-0.0352813	-0.0176413	0.048145	-0.0258025	0.047645	0.0004925	0.0176525	-0.025155	-0.033175	-0.0758	0.0082075	0.02756	-0.0335475	-0.0344525	0.0886663	-0.0321862	0.01065	0.0535638	-0.0428087
YDL055C	PSA1	GDP-mannose pyrophosphorylase (mannose-1-phosphate guanyltransferase); synthesizes GDP-mannose from GTP and mannose-1-phosphate in cell wall biosynthesis; required for normal cell wall structure	0.220386	-0.51027	0.01481	0.114767	-0.381732	0.03084	0.190976	0.0780625	0.04681	0.103005	-0.00369875	0.215613	-0.0530525	-0.0474475	-0.10445	-0.0366425	0.057325	0.128633	-0.093375	0.0127137	0.035575	-0.0235712	-0.0136612	0.186087		0.127502	-0.089205	-0.027085
YDL056W	MBP1	Transcription factor; involved in regulation of cell cycle progression from G1 to S phase, forms a complex with Swi6p that binds to MluI cell cycle box regulatory element in promoters of DNA synthesis genes	0.143996	-0.06004	-0.08738	0.0193475	-0.0030675	-0.0392088	0.0542075	-0.0264787	-0.00196625	0.209322	-0.00748	-0.187194	-0.0526875	-0.180221	0.0253625	0.065885	-0.198967	0.00973375	-0.010165	-0.0461575	-0.12514	-0.125188	-0.0594937	0.09615	-0.0139525	0.22489	0.0223313	0.121331
YDL057W		Putative protein of unknown function; YDL057W is not an essential gene	-0.0312675	-0.00078375	-0.022855	0.00864625	0.0578975	0.02732	0.02191	-0.0388887	0.0270738	-0.0400575	0.019755	0.04794	-0.00282	-0.0371413	-0.025415	-0.017005	0.0310237	-0.0296675	-0.0623075	-0.0853587	0.00744125	0.0264612	-0.0286987
YDL058W	USO1	Essential protein involved in vesicle-mediated ER to Golgi transport; binds membranes and functions during vesicle docking to the Golgi; required for assembly of the ER-to-Golgi SNARE complex	-0.125108	-0.026435	-0.049055	-0.0382225	-0.124415	-0.00819625	0.02135	-0.0144525	-0.047545	-0.0101712	-0.0119238	-0.1116	-0.106425	-0.0361138	-0.0332975	-0.0367063	-0.0360375	0.024045	-0.0546625	-0.0262513	0.0143075	0.0057975	-0.0589512	-0.06151	0.0489825	0.0522512	0.414946	0.366455
YDL059C	RAD59	Protein involved DNA double-strand break repair; repairs breaks in DNA during vegetative growth via recombination and single-strand annealing; anneals complementary single-stranded DNA; forms nuclear foci upon DNA replication stress; required for loading of Rad52p to DSBs; regulates replication fork progression in DNA ligase I-deficient cells; paralog of Rad52p	0.0616987	-0.0284625	0.041455	-0.126917	-0.122612	-0.0420888	-0.051215	-0.125434	0.0229488	-0.0205238	0.0175975	-0.00118625	-0.02396	0.036075	-0.00299875	-0.0295263	0.00709875	-0.00656	0.002375	-0.0594	0.0503113	-0.0102375	-0.0247937	-0.135763	-0.0147688	-0.00076875	-0.021745	-0.113746
YDL060W	TSR1	Protein required for processing of 20S pre-rRNA in the cytoplasm; associates with pre-40S ribosomal particles; inhibits the premature association of 60S subunits with assembling 40S subunits in the cytoplasm; similar to Bms1p; relocalizes from nucleus to cytoplasm upon DNA replication stress	-0.0854638	-0.0378238	0.0639	-0.0333437	-0.0176612	-0.0109775	-0.0921338	0.177278	0.0408375	-0.0190325	-0.00600875	-0.03285	-0.0165663	0.0793313	-0.169054	-0.0619888	-0.0514925	-0.034855	-0.007085	0.00765625	-0.0136925	0.0001775	0.0190587	-0.16279	-0.276751	-0.041195	0.253825	0.028395
YDL061C	RPS29B	Protein component of the small (40S) ribosomal subunit; homologous to mammalian ribosomal protein S29 and bacterial S14; RPS29B has a paralog, RPS29A, that arose from the whole genome duplication	0.008875	-0.169206	0.193988	0.0582037	0.525787	-0.07287	0.085775	0.0305538	-0.367365	0.222993	-0.0961525	-0.284558	0.241523	-0.0523	-0.0117425	-0.0316837	0.16058	0.0132875	0.402165	-0.0465925	0.365135	-0.033065	-0.0655175	-0.265553		0.063455	-0.104733	-0.126133
YDL062W		Dubious open reading frame; unlikely to encode a functional protein, based on available experimental and comparative sequence data; partially overlaps uncharacterized ORF YDL063C; YDL062W is not essential	-0.0031825	-0.0917962	0.712959	-0.0670062	-0.0252525	0.0038525	-0.004505	0.334143	-0.0131212	0.0464087	-0.0135625	-0.0094375	-0.093475	-0.098135	-0.086315	-0.07799	0.00235625	0.0194463	-0.440915	0.0028025	-0.17063	-0.0433738	-0.117774
YDL063C	SYO1	Transport adaptor or symportin; facilitates synchronized nuclear coimport of the two 5S-rRNA binding proteins Rpl5p and Rpl11p; binds to nascent Rpl5p during translation; required for biogenesis of the large ribosomal subunit; green fluorescent protein (GFP)-fusion protein localizes to the cytoplasm and nucleus	-0.573902	-0.507806	0.024115	-0.121277		-0.26511	-0.0136425	0.0039	-0.0211	-0.0093325	0.090255	-0.04367	0.19557	-0.0703475			0.0868025	0.0378025	0.166433	-0.051005	0.100322	0.26871	0.123478	0.288038	0.0472612	-0.002035	0.117375	0.0689175
YDL064W	UBC9	SUMO-conjugating enzyme involved in the Smt3p conjugation pathway; nuclear protein required for S- and M-phase cyclin degradation and mitotic control; involved in proteolysis mediated by the anaphase-promoting complex cyclosome (APCC)	0.0168275	-0.0980638	0.01264	-0.0372125	0.0126725	0.0284025	0.128477	-0.0681413	-0.0207125	0.0257588	0.0637163	0.0178625	-0.0157775	0.0198075	-0.01237	0.0320375	0.011055	-0.0866575	-0.0099975	0.067865	0.0112912	-0.0307675	0.0229325	0.141808	-0.108768	-0.0189013	0.00798125	0.0502088
YDL065C	PEX19	Chaperone and import receptor for newly-synthesized class I PMPs; binds peroxisomal membrane proteins (PMPs) in the cytoplasm and delivers them to the peroxisome for subsequent insertion into the peroxisomal membrane; interacts with Myo2p and contributes to peroxisome partitioning	-0.0644625	-0.139598	0.0945587	0.0445575	0.11259	0.0805888	0.02827	0.0621325	0.12538	0.0213475	-0.106286	0.249331	0.0556987	0.16068	-0.0212425	0.0540225	0.207855	0.0476175	-0.00276375	0.0756688	0.0335737	0.0442237	0.12596	0.232025	0.062495	-0.05109	0.244512	0.216562
YDL066W	IDP1	Mitochondrial NADP-specific isocitrate dehydrogenase; catalyzes the oxidation of isocitrate to alpha-ketoglutarate; not required for mitochondrial respiration and may function to divert alpha-ketoglutarate to biosynthetic processes	-0.01673	-0.046435	0.0565187	0.0054	0.047375	0.00048625	0.151535	0.143174	0.0194788	-0.00055	-0.0140412	0.0962075	0.008675	-0.0116688	0.0092225	-0.002785	0.00418	-0.01242	-0.00966625	0.00104125	-0.038755	-0.0049425	0.0079725	-0.43417	-0.0190375	-0.015525	0.0894825	-0.0144725
YDL068W		Dubious open reading frame; unlikely to encode a functional protein, based on available experimental and comparative sequence data	-0.0369775	-0.06255	-0.050955	0.00196625	0.0715875	-0.021645	-0.115784	0.00806875	-0.009735	-0.046905	0.0305787	-0.0419975	-0.0738575	-0.035045	0.0106512	-0.0110188	-0.051915	-0.0452175	-0.04665	-0.0161175	0.0381975	-0.00953125	-0.0357862
YDL069C	CBS1	Mitochondrial translational activator of the COB mRNA; membrane protein that interacts with translating ribosomes, acts on the COB mRNA 5'-untranslated leader	-0.03404	0.149138	0.0231237	0.0687725	-0.027715	0.0553925	-0.178755	0.0254312	-0.0326325	0.0415637	-0.004025	-0.01333	0.00669	-0.02389	-0.0272325	0.00451	0.00892	-0.0570275	-0.0935237	-0.0817875	-0.00862	-0.0446325	-0.048705
YDL070W	BDF2	Protein involved in transcription initiation; acts at TATA-containing promoters; associates with the basal transcription factor TFIID; contains two bromodomains; corresponds to the C-terminal region of mammalian TAF1; redundant with Bdf1p; protein abundance increases in response to DNA replication stress; BDF2 has a paralog, BDF1, that arose from the whole genome duplication	0.01648	0.207077	0.0121625	-0.0220275	-0.117492	0.0279238	-0.181996	-0.0673025	0.00191	0.01269	0.0567962	0.0223412	0.173126	0.01209	-0.01897	-0.037195	0.0452925	-0.00230375	-0.0756075	0.0170075	0.00115875	-0.01675	-0.00284	-0.170571	-0.0658887	-0.0817812	-0.0075725	-0.183046
YDL071C		Dubious open reading frame; unlikely to encode a functional protein, based on available experimental and comparative sequence data; partially overlaps the verified ORF BDF2/YDL070W	-0.0135163	0.180345	0.106815	-0.0309325		0.0111075	-0.139763	-0.0412687	-0.0663775	-0.0692788	0.0582575	-0.082145	-0.04439	0.031015	0.0257725	0.080435	-0.00323125	0.03534	-0.090715	0.04413	-0.0131475	0.0672575	0.104095
YDL072C	YET3	Protein of unknown function; YET3 null mutant decreases the level of secreted invertase; homolog of human BAP31 protein; protein abundance increases in response to DNA replication stress	-0.13751	-0.0562413	-0.0478325	0.244406	-0.275736	0.0196625	0.040565	0.0436837	0.0169425	0.28128	-0.024715	0.0374662	0.0190363	-0.0595812	-0.0309087	-0.034715	0.004715	0.01947	0.0486963	-0.000185	-0.124916	0.03643	0.00559875	0.0983037	1.87344	0.404803	0.804515	0.117516
YDL073W	AHK1	Scaffold protein in the HKR1 sub-branch of the Hog1p-signaling pathway; physically interacts with the cytoplasmic domain of Hkr1p, and with Sho1p, Pbs2p, and Ste11p; prevents cross-talk signaling from Hkr1p of the osmotic stress MAPK cascade to the Kss1p MAPK cascade; non-essential gene	-0.197864	-0.05407	0.0851325	-0.168985	0.0336	-0.143975	0.0500113	0.0503475	-0.0993425	0.00077375	0.115656	-0.02852	0.143827	0.0065925	-0.151493	-0.0927612	0.193043	-0.139026	-0.103246	0.0167388	0.100464	-0.0728275	0.0457663
YDL076C	RXT3	Component of the Rpd3L histone deacetylase complex; involved in histone deacetylation; protein abundance increases in response to DNA replication stress	-0.0280138	0.0432763	0.03857	0.0553875	0.06605	0.0101525	-0.0831687	-0.00030875	-0.00881375	0.085915	-0.0305638	0.0142437	-0.0170737	0.00412875	0.0281087	0.022395	-0.109783	-0.0584288	-0.0348325	-0.047935	0.033775	0.0131588	-0.0587763	-0.385653	-0.218018	-0.0732875	-0.00635	-0.081425
YDL077C	VAM6	Guanine nucleotide exchange factor for the GTPase Gtr1p; subunit of the HOPS endocytic tethering complex; vacuole membrane protein; functions as a Rab GTPase effector, interacting with both GTP- and GDP-bound conformations of Ypt7p; facilitates tethering and promotes membrane fusion events at the late endosome and vacuole; required for both membrane and protein trafficking; component of vacuole-m…	0.01938	0.360251	-0.055345	-0.0198263	-0.0626238	-0.0331463	-0.0760725	-0.0725237	0.080945	0.0337	0.04788	-0.204019	-0.0336	0.15964	0.0183025	0.0046725	-0.0747475	0.0774963	0.443767	0.567392	-0.020135	-0.0018775	0.110725	-0.0158475	-0.73725	-0.01828	-0.231027	0.147625
YDL078C	MDH3	Peroxisomal malate dehydrogenase; catalyzes interconversion of malate and oxaloacetate; involved in the glyoxylate cycle	0.053925	-0.12065	0.0741987	-0.0473625	-0.0835425	-0.0789675	-0.0492425	-0.0108413	-0.0286987	0.170126	0.034485	-0.155578	-0.02951	-0.02526	-0.07084	-0.0097125	0.0329675	-0.025445	0.074495	0.09023	-0.0159275	0.066525	0.116138	0.162688	0.420179	-0.111918	-0.0167237	0.0416925
YDL079C	MRK1	Glycogen synthase kinase 3 (GSK-3) homolog; one of four GSK-3 homologs in S. cerevisiae that function to activate Msn2p-dependent transcription of stress responsive genes and that function in protein degradation; MRK1 has a paralog, RIM11, that arose from the whole genome duplication	0.0205625	-0.0705975	0.0174737	0.0205688	-0.1185	0.0606225	0.134525	-0.0861487	0.0292537	-0.0320825	0.0660475	-0.0358287	-0.0761662	-0.125884	0.0147125	-0.02441	-0.113452	-0.0326463	-0.0692875	-0.0529925	0.0146962	-0.03246	-0.0250075
YDL080C	THI3	Regulatory protein that binds Pdc2p and Thi2p transcription factors; activates thiamine biosynthesis transcription factors Pdc2p and Thi2p by binding to them, but releases and de-activates them upon binding to thiamine pyrophosphate (TPP), the end product of the pathway; has similarity to decarboxylases but enzymatic activity is not detected	-0.0320925	0.099945	0.021845	0.0335613	-0.194057	-0.0221025	-0.177292	-0.142453	0.002325	0.01671	0.00875125	-0.0592075	-0.0515425	0.12305	-0.0216275	0.00233	-0.02105	-0.001065	-0.0602875	-0.0432162	-0.0211675	-0.05058	-0.0177625	-0.088675	-0.0267175	-0.0703913	0.136589	0.059645
YDL081C	RPP1A	Ribosomal stalk protein P1 alpha; involved in the interaction between translational elongation factors and the ribosome; free (non-ribosomal) P1 stimulates the phosphorylation of the eIF2 alpha subunit (Sui2p) by Gcn2p; accumulation of P1 in the cytoplasm is regulated by phosphorylation and interaction with the P2 stalk component	0.0098575	-0.353648	0.039965	-0.00516375		-0.087145	0.15998	-0.138051	-0.11719	-0.165355	-0.186361	0.56853	-0.217296	-0.54911	-0.148665	-0.01603	-0.203165	0.18148	0.161771	-0.11522	0.0941225	0.43348	0.170393	-0.679107	-0.40962	-0.218545	0.027065	-0.503485
YDL082W	RPL13A	Ribosomal 60S subunit protein L13A; not essential for viability; homologous to mammalian ribosomal protein L13, no bacterial homolog; RPL13A has a paralog, RPL13B, that arose from the whole genome duplication	0.0681575	0.0120425	-0.02531	0.00485125	-0.152363	0.01137	0.0501525	-0.00434125	-0.119464	0.0872062	-0.115039	-0.053365	0.019195	-0.0364125	0.114059	0.02593	-0.145685	-0.0216	0.0527975	-0.024195	-0.0353125	0.0256413	0.0007375
YDL083C	RPS16B	Protein component of the small (40S) ribosomal subunit; homologous to mammalian ribosomal protein S16 and bacterial S9; RPS16B has a paralog, RPS16A, that arose from the whole genome duplication	0.164715	-0.194825	-0.097215	-0.128485	0.415715	-0.026685	-0.0905388	0.01155	0.200895	-0.09667	0.197294	-0.0834688	-0.0226688	0.0879475	-0.0406125	0.037	0.0517263	-0.0892788	-0.04362	-0.0919762	0.0632675	0.0839625	0.491372	0.75338	0.0067375	-0.130678	0.781756	0.559819
YDL084W	SUB2	Component of the TREX complex required for nuclear mRNA export; member of the DEAD-box RNA helicase superfamily and is involved in early and late steps of spliceosome assembly; homolog of the human splicing factor hUAP56; relocalizes from nucleus to cytoplasm upon DNA replication stress	0.129519	-0.152301	-0.07138	-0.166505	-0.0247825	0.0191137	-0.0661638	0.006205	0.0456825	-0.0467513	-0.0277562	0.0977075	-0.03491	0.228307	0.147992	0.00722125	0.0495225	-0.012815	0.0253337	-0.05974	1.625e-05	-0.009505	-0.0347838	-0.106325	-0.0867125	-0.207927	-0.0221275	0.0869275
YDL085C-A		Putative protein of unknown function; green fluorescent protein (GFP)-fusion protein localizes to the cytoplasm and nucleus	0.13606	0.125244	0.0657275	-0.0487138	0.108031	-0.02353	0.04639	-0.204626	-0.04272	0.0256375	0.150042	-0.0212425	0.04033	-0.117383	-0.0245975	0.116526	-0.054575	-0.00125	0.160913	0.023035	0.07976	0.0360175	0.12433	-0.130751	0.02035	-0.0319225	-0.100148	-0.112006
YDL085W	NDE2	Mitochondrial external NADH dehydrogenase; catalyzes the oxidation of cytosolic NADH; Nde1p and Nde2p are involved in providing the cytosolic NADH to the mitochondrial respiratory chain; NDE2 has a paralog, NDE1, that arose from the whole genome duplication	-0.16444	0.06657	-0.0125775	0.0205488	-0.0187175	0.0357463	0.0960825	-0.0597875	0.0370588	-0.0142875	0.0291912	-0.0516713	-0.025965	0.0471475	-0.122052	-0.02594	0.0756725	0.00957	-0.098505	0.054635	-0.023475	-0.0007425	-0.0510313
YDL086W		Putative carboxymethylenebutenolidase; the authentic, non-tagged protein is detected in highly purified mitochondria in high-throughput studies; YDL086W is not an essential gene	0.109247	-0.11083	0.028095	0.00957	0.0614775	0.0134525	0.0200925	-0.11605	-0.00844	0.088205	-0.0002125	-0.0043825	0.0485013	-0.0170475	0.03439	0.0101013	0.0422875	-0.0430975	0.0922125	0.01766	0.0106625	0.068625	-0.009475
YDL087C	LUC7	Essential protein associated with the U1 snRNP complex; splicing factor involved in recognition of 5' splice site; contains two zinc finger motifs; N-terminal zinc finger binds pre-mRNA; relocalizes to the cytosol in response to hypoxia	-0.0415875	-0.12173	-0.03523	0.07161	0.394473	0.01886	0.0274125	0.07626	-0.0974775	-0.083655	-0.0077975	0.0033475	-0.032525	0.146695	0.0393175	0.101345	0.0358875	-0.0367	0.144797	0.29186	-0.0066775	-0.0183625	-0.014325	-0.02304	-0.0680338	0.179822	-0.216097	-0.0938963
YDL088C	ASM4	FG-nucleoporin component of central core of nuclear pore complex (NPC); contributes directly to nucleocytoplasmic transport; induces membrane tubulation, which may contribute to nuclear pore assembly; ASM4 has a paralog, NUP53, that arose from the whole genome duplication	-0.0026875	-0.086545	-0.0382475	0.02213	-0.10645	0.052355	-0.0251437	-0.0391113	0.0822875	0.245969	0.02027	0.0236275	0.050605	-0.0473525	0.033035	0.0196775	-0.0441025	0.0640675	0.0870963	0.00151	0.037315	0.0388425	0.0016125	-0.020985	-0.032795	-0.0497338	0.0948787	0.0925675
YDL090C	RAM1	Beta subunit of the CAAX farnesyltransferase (FTase); this complex prenylates the a-factor mating pheromone and Ras proteins; required for the membrane localization of Ras proteins and a-factor; homolog of the mammalian FTase beta subunit	0.116358	0.157183	0.11134	-0.0090425	-0.173102	0.0048875	0.056635	0.107219	0.00586625	0.189741	-0.12199	0.112202	-0.003015	-0.00946625	0.0463788	-0.0439263	-0.0208188	0.059505	0.0881475	-0.05219	-0.130141	0.043695	0.0694125	-0.32495	-0.014015	0.0418175	-0.020955	-0.188755
YDL091C	UBX3	Clathrin-coated vesicle component, regulator of endocytosis; copurifies with the DSC ubiquitin ligase complex; UBX (ubiquitin regulatory X) domain-containing protein that interacts with Cdc48p; required for efficient clathrin-mediated endocytosis; ortholog of fission yeast Ucp10	-0.636586		-1.20097			-0.0303475	0.348562	-0.443096	-0.31625	0.227149	0.02328		0.449817	0.0058475			0.101111			-0.044765	-0.404094			0.191642	-0.101011	-0.101983	0.0687137	0.008375
YDL092W	SRP14	Signal recognition particle (SRP) subunit; interacts with the RNA component of SRP to form the Alu domain, which is the region of SRP responsible for arrest of nascent chain elongation during membrane targeting; homolog of mammalian SRP14	-0.021145	-0.0542137	0.0100225	-0.0108538	0.16579	-0.01983	0.039475	0.43157	0.00515375	0.05463	-0.130496	0.458931	0.30393	0.849818	-0.0319575	0.433383	-0.0221625	0.00873	0.881317	0.087835	-0.034925	0.50029	0.0679075	1.49215	0.547118	0.130637	1.90817	0.228508
YDL093W	PMT5	Protein O-mannosyltransferase; transfers mannose residues from dolichyl phosphate-D-mannose to protein serine/threonine residues; acts in a complex with Pmt3p, can instead interact with Pmt2p in some conditions; target for new antifungals	0.062225	0.029705	-0.0973037	-0.00308125	0.178698	-0.002205	-0.0739275	-0.178795	0.030425	0.0650837	0.00268	-0.026235	0.0016475	0.0077575	-0.02277	0.01735	-0.046505	0.0765075	-0.0752137	-0.00555625	0.0100975	-0.0020625	-0.018635
YDL094C		Dubious open reading frame; unlikely to encode a functional protein, based on available experimental and comparative sequence data; partially overlaps verfied gene PMT5/YDL093W; YDL094C is not essential	-0.0632812	-0.106463	0.024315	0.028655	-0.0970837	0.0584563	-0.09022	0.02818	-0.0148525	0.0147225	-0.0749675	0.016595	-0.042425	0.0422413	-0.0656362	-0.063635	-0.0709688	0.0634163	-0.0467375	-0.0742437	-0.101784	0.0017975	-0.000515
YDL095W	PMT1	Protein O-mannosyltransferase of the ER membrane; transfers mannose from dolichyl phosphate-D-mannose to protein serine and threonine residues; 1 of 7 related proteins involved in O-glycosylation which is essential for cell wall rigidity; involved in ER quality control; amino terminus faces cytoplasm, carboxyl terminus faces ER lumen	-0.0983313	-0.0553575	-0.0081375	-0.019565	-0.140827	0.00263125	-0.0831175	0.363994	0.134389	-0.0150475	0.009035	0.0226613	-0.003325	-0.0493462	0.0244263	-0.00439	-0.0973675	-0.162354	-0.206566	-0.0491625	-0.173278	-0.0013175	0.0551413	0.04384	0.0361887	-0.0570725	-0.105741	-0.0704463
YDL096C	OPI6	Dubious open reading frame; unlikely to encode a functional protein, based on available experimental and comparative sequence data; partially overlaps verified gene PMT1/YDL095W; YDL096C is not essential	-0.0630575	0.165018	0.0109125	0.0323613	0.0842562	0.017935	-0.0634125	0.0595087	0.0353275	-0.0450925	0.0605038	-0.03336	-0.0163513	-0.019655	-0.00319	-0.0210025	-0.0199975	-0.035175	0.0789488	-0.0263775	0.21363	0.0119325	-0.0949875
YDL097C	RPN6	Essential, non-ATPase regulatory subunit of the 26S proteasome lid; required for the assembly and activity of the 26S proteasome; the human homolog (S9 protein) partially rescues Rpn6p depletion; protein abundance increases in response to DNA replication stress	-0.0750037	0.113571	-0.037735	0.00284125	-0.00369	0.001725	-0.251626	0.336001	0.016085	0.00214625	0.04003	0.205035	0.0269337	0.097415	-0.07078	-0.069855	-0.146239	0.0838062	0.265838	0.0554675	-0.156214	0.0205287	0.0203525	0.0714675	-0.0420087	-0.03368	0.272056	-0.1129
YDL098C	SNU23	Component of the U4/U6.U5 snRNP complex; involved in mRNA splicing via spliceosome	-0.0257825	-0.202291	-0.06372	0.0285162	-0.18024	0.00612	0.0438225	0.0154062	-0.0654825	0.045675	0.0451013	0.08056	0.00334375	0.106332	-0.06245	-0.023085	0.046145	-0.0136712	0.20308	0.0399425	-0.059905	-0.06825	0.114965	-0.130129	-0.0175375	-0.06141	-0.0187462	-0.049905
YDL099W	BUG1	Cis-golgi localized protein involved in ER to Golgi transport; forms a complex with the mammalian GRASP65 homolog, Grh1p; mutants are compromised for the fusion of ER-derived vesicles with Golgi membranes	-0.190311	0.145614	0.036265	-0.0194987	-0.0199	-0.019315	-0.131924	0.0250562	-0.00099375	0.0269975	0.0253725	0.082045	0.0623262	-0.0712025	-0.00925625	-0.0524462	-0.0155287	0.0076175	-0.025975	-0.0722375	-0.04938	-0.01433	-0.0252062	-0.110225	-0.000735	0.0323725	-0.00142	0.030005
YDL100C	GET3	Guanine nucleotide exchange factor for Gpa1p; amplifies G protein signaling; functions as a chaperone under ATP-depleted oxidative stress conditions; subunit of GET complex, involved in ATP dependent Golgi to ER trafficking and insertion of tail-anchored (TA) proteins into ER membrane under non-stress conditions; binds as dimer to transmembrane domain (TMD) cargo, shielding TMDs from aqueous solv…	0.019365	0.193755	-0.0192588	0.120355	0.075055	0.0023175	0.00350625	-0.00273375	-0.0359962	0.0136325	0.00498	0.0659725	0.021205	-0.0410475	-0.0148562	0.0204037	0.0937125	-0.0506125	0.0307125	0.00404	0.04366	0.052365	0.0279875	0.293648	1.17474	0.133598	0.02896	0.20521
YDL101C	DUN1	Cell-cycle checkpoint S/T protein kinase; required for transient G2/M arrest after DNA damage, damage-induced transcription, and nuclear-to-cytoplasmic redistribution of Rnr2p-Rnr4p after genotoxic stress and iron deprivation; phosphorylates repair protein Rad55p, transcriptional repressor Sml1p, superoxide dismutase, and ribonucleotide reductase inhibitors Crt1p and Dif1p; functions in the Mec1p…	0.0240863	-0.01239	0.0408513	0.0018425	-0.0379637	-0.0247612	-0.113642	-0.17252	0.243435	-0.09488	0.00473375	0.100155	0.0047825	0.00678375	-0.02414	0.0583237	-0.221555	0.111404	-0.0070025	0.055125	-0.00538125	-0.0230475	0.003385	0.17175	-0.1179	-0.374669	0.033685	-0.0980862
YDL102W	POL3	Catalytic subunit of DNA polymerase delta; required for chromosomal DNA replication during mitosis and meiosis, intragenic recombination, repair of double strand DNA breaks, and DNA replication during nucleotide excision repair (NER)	0.0431875	-0.331045	0.651772	0.0212925	2.11098	0.619774	0.162989	0.651948	0.136648	-0.0873913	0.105979	0.0014825	-0.0949437	0.791422	-0.141742	-0.177029	-0.0519087	0.0744563	0.759915	0.856747	0.0970862	0.315209	1.03522	-0.070855	0.0792363	0.0526688	0.0727837	0.0278225
YDL103C	QRI1	UDP-N-acetylglucosamine pyrophosphorylase; catalyzes the formation of UDP-N-acetylglucosamine (UDP-GlcNAc), which is important in cell wall biosynthesis, protein N-glycosylation, and GPI anchor biosynthesis; protein abundance increases in response to DNA replication stress	-0.0162037	0.0171575	-0.167086	-0.04292	-0.143948	0.00154	0.044725	0.199934	-0.122146	-0.163848	0.0367675	-0.039595	0.0326888	-0.0236412	-0.0303887	0.028275	0.122679	-0.049495	0.0916213	0.0492375	-0.057305	-0.0326688	-0.0653188	-0.138868	0.0558375	0.00608875	0.0181637	-0.0751675
YDL104C	QRI7	Protein involved in threonylcarbamoyl adenosine biosynthesis; Sua5p and Qri7p are necessary and sufficient for RNA t6A modification in vitro; highly conserved mitochondrial protein; essential for t6A modification of mitochondrial tRNAs that decode ANN codons; similar to Kae1p and E. coli YgjD, both of which are also required for tRNA t6A modification; when directed to the cytoplasm, complements t…	-0.189854	0.0026675	-0.09303	0.0686637	-0.0593075	-0.016745	0.335175	-0.001045	-0.123719	-0.187092	-0.0435625	-0.008205	-0.207957	-0.0493362	-0.204127	-0.1252	-0.242707	-0.01222	-0.1608	-0.044835	-0.0653512	-0.0410675	-0.0222	0.0631662	-0.046435	-0.167128	0.0053225	0.0298475
YDL105W	NSE4	Component of the SMC5-SMC6 complex; this complex plays a key role in the removal of X-shaped DNA structures that arise between sister chromatids during DNA replication and repair	-0.03128	0.033735	0.00699	0.0211863	0.141409	-0.0112862	-0.134351	0.105911	-0.00099375	0.0920038	-0.0506187	0.0231687	-0.0118288	-0.0817125	0.0797863	0.096395	-0.0523712	-0.102554	-0.0137825	-0.0289937	0.0099625	0.0168913	-0.00453625	0.24418	-0.0182887	-0.0863875	-0.018435	0.0089725
YDL106C	PHO2	Homeobox transcription factor; regulatory targets include genes involved in phosphate metabolism; binds cooperatively with Pho4p to the PHO5 promoter; phosphorylation of Pho2p facilitates interaction with Pho4p; relocalizes to the cytosol in response to hypoxia	-0.0542325	0.037695	0.063155	0.0226	0.07075	0.016695	-0.0749075	0.112893	0.03316	-0.091825	-0.0152462	-0.07587	-0.0301238	0.0202837	-0.0544912	0.0333888	0.188523	-0.112339	0.0517712	0.0402887	0.0210387	0.0120675	0.0112362	-0.0486125	0.0422688	-0.345615	0.0513475	0.0541563
YDL107W	MSS2	Peripherally bound inner membrane protein of the mitochondrial matrix; involved in membrane insertion of C-terminus of Cox2p, interacts genetically and physically with Cox18p	-0.00604125		-0.06455			-0.030095	0.0368638	0.05852	-0.0189	-0.08561	0.0213712	0.028275	0.0368125	0.02896			-0.0785775	-0.0125675	-0.046075	-0.0262887	0.020085	0.0196587	-0.105679	-0.0475725	-0.0263775	0.130449	-0.0324137	-0.103862
YDL108W	KIN28	Serine/threonine protein kinase, subunit of transcription factor TFIIH; involved in transcription initiation at RNA polymerase II promoters; phosphorylates Ser5 residue of the PolII C-terminal domain (CTD) at gene promoters; relocalizes to the cytosol in response to hypoxia	-0.101175	-0.0363062	-0.0491538	0.0953587	0.0232462	0.0664037	-0.06327	0.0427425	-0.0154	0.0134138	-0.045545	0.019985	-0.0338538	-0.0160787	-0.0419775	0.0238937	-0.042865	0.047895	0.000325	-0.04259	-0.12978	0.0500475	0.0136125	0.670994	0.0604725	0.316302	-0.052465	0.339448
YDL109C		Putative lipase; involved in lipid metabolism; not an essential gene; YDL109C has a paralog, ROG1, that arose from the whole genome duplication	0.0245112	-0.453316	0.0349775	-0.0284125	-0.227142	0.0617687	-0.009265	-0.00407	-0.143475	-0.103785	-0.0253438	-0.07686	-0.0465975	-0.0158737	-0.06236	-0.168378	-0.102204	-0.0698513	-0.0143225	-0.065225	0.556812	0.0436775	-0.0217162
YDL110C	TMA17	ATPase dedicated chaperone that adapts proteasome assembly to stress; Tma17p is induced upon stress; interacts with Rpt6p to assist its pairing to Rpt3p and early steps in proteasome biogenesis; associates with ribosomes; heterozygous deletion demonstrated increases in chromosome instability in a rad9 deletion background; protein abundance is decreased upon intracellular iron depletion	0.03836	0.0718175	-0.100255	-0.104523	-0.06075	0.0113113	-0.00344375	-0.112119	-0.0422113	-0.0523013	0.00527875	-0.150401	-0.0894025	0.03099	-0.0004625	0.00078625	-0.0032525	-0.0152338	0.00810375	-0.10561	0.054125	0.0178175	0.0168237	-0.105637	-0.0403112	-0.0608225	-0.112143	-0.104785
YDL111C	RRP42	Exosome non-catalytic core component; involved in 3'-5' RNA processing and degradation in both the nucleus and the cytoplasm; has similarity to E. coli RNase PH and to human hRrp42p (EXOSC7)	0.0757775	0.124008	0.04826	0.0293225	-0.0129375	0.0677	0.108901	0.0440338	-0.0498738	-0.0171612	0.122036	0.18647	0.190565	0.571549	-0.157277	-0.0679025	0.144784	0.180755	0.65569	0.47057	0.0822275	0.337245	0.14334	0.71608	0.118569	0.263288	-0.70691	-0.701296
YDL112W	TRM3	2'-O-ribose methyltransferase; catalyzes the ribose methylation of the guanosine nucleotide at position 18 of tRNAs	-0.132672	-0.0523375	0.041785	-0.00370625	-0.0519512	-0.0521812	-0.0238475	0.12927	-0.0695175	0.01576	0.0272875	-0.160578	0.0331862	0.0294387	-0.0666	0.0042075	-0.213968	-0.109644	-0.0313475	0.0617075	0.0804225	-0.0635725	0.0464325	-0.0421738	-0.218451	-0.163364	-0.107125	0.0193638
YDL113C	ATG20	Sorting nexin family member; required for the cytoplasm-to-vacuole targeting (Cvt) pathway and for endosomal sorting; has a Phox homology domain that binds phosphatidylinositol-3-phosphate; interacts with Snx4p; potential Cdc28p substrate	0.0220625	-0.144915	0.0244888	0.0211825	-0.00330375	0.036135	0.0457012	0.08283	0.00353875	-0.10662	-0.164116	-0.0044525	0.005845	-0.0274825	-0.019995	0.0351588	-0.01285	0.011345	0.0732575	-0.0700775	-0.001115	-0.005875	0.083355	-0.1304	-0.06918	-0.2588	-0.044695	-0.140407
YDL114W		Putative short-chain dehydrogenase/reductase; YDL114W is not an essential gene	0.0444875	-0.103939	0.0031	-0.0138237	0.0851725	-0.0551488	-0.0839562	0.0751462	-0.0272175	0.076075	-0.00028375	-0.096435	-0.0813225	-0.0156625	0.02933	0.0306125	-0.0839962	-0.0382938	-0.0509488	-0.0304625	0.00075875	-0.003145	-0.0289637
YDL115C	IWR1	RNA polymerase II transport factor, conserved from yeast to humans; also has a role in transporting RNA polymerase III into the nucleus; interacts with most of the RNAP II subunits; nucleo-cytoplasmic shuttling protein; deletion causes hypersensitivity to K1 killer toxin; protein increases in abundance and relocalizes from nucleus to cytoplasm upon DNA replication stress	-0.124918	0.0937025	-0.0498262	0.03888	-0.0476225	-0.0419112	-0.0243075	0.295195	-0.0619813	0.0505537	-0.0213162	-0.0175775	-0.07511	-0.0243613	-0.0592138	0.0315225	0.0519613	-0.0576437	0.08003	-0.050885	-0.0604337	-0.0167687	-0.0613175	-0.332832	0.137991	0.164105	0.0757212	-0.049685
YDL116W	NUP84	Subunit of the Nup84p subcomplex of the nuclear pore complex (NPC); contributes to nucleocytoplasmic transport and NPC biogenesis; also plays roles in several processes that may require localization of genes or chromosomes at the nuclear periphery, including double-strand break repair, transcription and chromatin silencing; homologous to human NUP107	0.0023775	0.13736	0.0632212	0.00200125	0.137047	0.003195	0.0115825	-0.487598	0.133362	0.102186	-0.049355	1.20731	0.109995	1.43856	-0.0048025	0.50451	0.0221875	0.105515	1.019	0.290091	-0.05275	0.2137	0.0639175	0.41327	-0.190389	-0.118513	-0.0516862	0.199996
YDL117W	CYK3	SH3-domain protein located in the bud neck and cytokinetic actin ring; relocalizes from bud neck to nucleus upon DNA replication stress; activates the chitin synthase activity of Chs2p during cytokinesis; suppressor of growth and cytokinesis defects of chs2 phospho-mutants	0.142159	-0.0547562	-0.06622	0.0721775	0.155551	0.032305	0.0193675	0.0261875	0.00184625	0.0361962	-0.0193488	0.115795	0.0511737	0.0817975	0.165724	0.0734438	0.0849837	0.0500375	0.180874	0.0637525	0.06138	0.0429413	0.024025	-0.0360888	0.138115	0.0072625	-0.170556	0.0447425
YDL118W		Dubious open reading frame, unlikely to encode a protein; overlaps almost completely with YDL119C; mutations that would affect both YDL118W and YDL119C confer defective telomere maintenance and are synthetically sick or lethal with alpha-synuclein	-0.0443925	-0.118095	0.00617125	0.107984	-0.0479937	-0.0220625	0.0293225	0.092665	-0.03091	0.09014	0.0082075	0.032235	-0.221525	-0.01993	-0.105725	0.0237075	-0.0424375	0.024755	-0.275178	-0.012865	-0.0674625	-0.03443	0.056365
YDL119C	HEM25	Mitochondrial glycine transporter; required for the transport of glycine into mitochondria for initiation of heme biosynthesis, with YMC1 acting as a secondary transporter; homolog of human SLC25A38, a mitochondrial glycine transporter associated with nonsyndromic autosomal recessive congenital sideroblastic anemia; human SLC25A38 can complement the heme deficiency associated with the null mutant…	-0.0937375	0.131245	0.0703725	0.0940187	-0.0049925	-0.0241	-0.150416	-0.0734825	-0.0128425	0.0670738	0.0474738	0.0206262	-0.0086725	-0.0847375	0.0296575	0.0154725	-0.00935	-0.0154763	0.06491	-0.0370813	0.00278	-0.0552625	-0.0367075	-0.00157625	-0.05396	-0.07261	-0.0973975	-0.0005925
YDL120W	YFH1	Mitochondrial matrix iron chaperone; oxidizes and stores iron; interacts with Isu1p to promote Fe-S cluster assembly; mutation results in multiple Fe/S-dependent enzyme deficiencies; human frataxin homolog FXN is mutated in Friedrich's ataxia; human FTL gene can complement yeast yfh1 null mutant	0.036125	-0.0311925	-0.0698075	-0.074855	-0.0536575	-0.0196275	-0.0168925	-0.047875	0.09759	0.0037525	-0.0177925	0.0064675	-0.0409388	0.020535	0.006215	0.037445	2.75e-05	-0.0031725	0.0164125	-0.011885	-0.00476	-0.049335	0.00011	-0.0404175	-0.0930925	0.007145	0.0793187	0.0595538
YDL121C		Putative protein of unknown function; green fluorescent protein (GFP)-fusion protein localizes to the endoplasmic reticulum; YDL121C is not an essential protein	-0.023315	0.0695675	-0.062245	0.0204775	-0.0263525	-0.0101937	-0.140749	-0.183336	0.0277562	0.124981	0.0503062	-0.0728763	-0.0254325	0.1342	0.0039025	0.0599812	0.0097225	-0.00584875	-0.0238012	-0.0352	0.04598	0.0599425	0.0166038	-0.212601	2.14902	0.136824	0.463514	-0.0812887
YDL122W	UBP1	Ubiquitin-specific protease; removes ubiquitin from ubiquitinated proteins; cleaves at the C terminus of ubiquitin fusions irrespective of their size; capable of cleaving polyubiquitin chains	0.18165	-0.006675	0.0904187	0.0216325	0.32182	0.0521037	0.127881	0.141629	0.056555	0.0804475	0.0036625	-0.117009	-0.142159	0.128661	0.018035	-0.0947438	-0.0111925	-0.151202	0.0049425	0.0677737	0.0329713	-0.03213	0.179982	0.334315	0.06723	0.02274	-0.042985	0.0972425
YDL123W	SNA4	Protein of unknown function; localized to the vacuolar outer membrane; predicted to be palmitoylated	0.0255525	0.0190575	-0.0093025	-0.0298675	-0.106734	-0.00317625	0.07444	0.0924588	0.0368013	0.0343112	0.0122913	0.0513163	-0.0054625	0.145943	0.117355	-0.0643013	0.1696	0.0283925	-0.043745	0.00198125	0.0237287	-0.00385875	0.061535	0.0351863	-0.212036	-0.0644	0.220298	-0.0637725
YDL125C	HNT1	Adenosine 5'-monophosphoramidase; interacts physically and genetically with Kin28p, a CDK and TFIIK subunit, and genetically with CAK1; member of histidine triad (HIT) superfamily of nucleotide-binding proteins; protein abundance increases in response to DNA replication stress; human homolog HINT1 can complement yeast hnt1 mutant	0.0900037	0.0886863	-0.0609725	-0.0086725	-0.104904	0.054915	0.0745263	0.0327938	0.0444662	-0.150477	0.0511425	0.129667	-0.119106	-0.0988525	-0.019855	-0.02208	-0.0385725	0.043435	-0.331018	-0.03917	0.02098	0.0610275	-0.04888	0.141893	-0.121243	0.199319	-0.0135812	-0.0475937
YDL126C	CDC48	AAA ATPase; subunit of polyUb-selective segregase complex involved in ERAD, INM-associated degradation (INMAD), mitotic spindle disassembly, macroautophagy, PMN, ribosome-associated degradation, ribophagy, homotypic ER membrane fusion, SCF complex disassembly, cell wall integrity during heat stress, and telomerase regulation; mobilizes membrane-anchored transcription factors by regulated Ub/prote…	-0.143483	0.0709662	0.105119	0.0179962	0.15659	-0.029435	0.0512362	-0.11806	-0.123092	-0.161054	-0.03662	0.229031	0.485996	0.0588588	0.073605	-0.06326	0.216696	-0.062335	0.0428475	0.151589	-0.0404362	0.0127625	0.0861225	0.131659	0.523968	0.0473563	-0.04062	-0.0706762
YDL128W	VCX1	Vacuolar membrane antiporter with Ca2+/H+ and K+/H+ exchange activity; involved in control of cytosolic Ca2+ and K+ concentrations; has similarity to sodium/calcium exchangers, including the bovine Na+/Ca2+,K+ antiporter	-0.0247013	0.0350712	0.0211863	-0.0448088	0.07963	-0.0288312	0.0057025	0.0083275	-0.0341125	0.0015025	0.0175387	0.0324038	-0.0711038	0.0073975	0.0135388	0.00946875	-0.0166075	-0.0201225	0.0928337	-0.0144925	0.0745375	-0.0163925	0.11429	-0.169124	0.830399	0.0735512	0.01445	-0.191455
YDL129W		Protein of unknown function; green fluorescent protein (GFP)-fusion protein localizes to the cytoplasm and the nucleus; YDL129W is not an essential gene; relative distribution to the nucleus increases upon DNA replication stress	0.0518175	0.02545	-0.066975	0.0495975	-0.142214	0.0100475	0.07768	0.0833037	0.0115388	-0.064045	0.05585	0.0132	0.057665	0.009325	0.0199287	0.00664	0.0028475	0.0368225	-0.0435963	-0.0220825	-0.01892	0.000255	-0.042465	-0.362032	-0.0306487	0.0026525	-0.0293625	-0.07079
YDL130W	RPP1B	Ribosomal protein P1 beta; component of the ribosomal stalk, which is involved in interaction of translational elongation factors with ribosome; free (non-ribosomal) P1 stimulates the phosphorylation of the eIF2 alpha subunit (Sui2p) by Gcn2p; accumulation is regulated by phosphorylation and interaction with the P2 stalk component	-0.041425	0.269747	-0.0117062	0.131205	0.108342	0.01594	0.0782762	-0.066345	0.0178062	0.105277	-0.02879	0.04518	0.0624113	-0.120887	-0.0597637	0.00234625	0.101126	-0.0595725	0.104931	0.0563138	-0.10337	0.08017	0.06331	0.26522	0.160146	0.23688	0.0707938	-0.0016475
YDL130W-A	STF1	Protein involved in regulation of the mitochondrial F1F0-ATP synthase; Stf1p and Stf2p act as stabilizing factors that enhance inhibitory action of the Inh1p protein; protein abundance increases in response to DNA replication stress; STF1 has a paralog, INH1, that arose from the whole genome duplication	0.135675	-0.0853063	-0.0303225	0.0494925	-0.0554663	-0.0721337	-0.042945	-0.0343162	-0.0546475	0.0241137	0.0159775	-0.008305	-0.0045825	0.0138	0.004045	0.0130925	0.04727	-0.0247213	0	-0.0085875	0.11154	-0.0002475	-0.056255	0.21701	-0.337565	-0.0630125	-0.240913	-0.0915275
YDL131W	LYS21	Homocitrate synthase isozyme; catalyzes the condensation of acetyl-CoA and alpha-ketoglutarate to form homocitrate, which is the first step in the lysine biosynthesis pathway; LYS21 has a paralog, LYS20, that arose from the whole genome duplication	-0.22178	0.052775	-0.144372	0.0746725	-0.0462575	-0.0837675	-0.135801	0.0355775	0.0171575	-0.107415	-0.0575063	0.004965	0.0540925	0.0425125	0.057785	0.026695	-0.105905	-0.0721525	-0.076975	-0.025625	-0.0639025	0.010985	-0.004445	0.0337138	-0.0499363	-0.0850038	0.259514	0.174901
YDL132W	CDC53	Cullin; structural protein of SCF complexes (which also contain Skp1p, Cdc34p, Hrt1p and an F-box protein) involved in ubiquitination; SCF promotes the G1-S transition by targeting G1 cyclins and the Cln-CDK inhibitor Sic1p for degradation; human homolog CUL1 can complement yeast cdc53 null mutant	0.0183775	0.0329625	-0.133203	-0.0008775	-0.00913125	-0.00696	-0.2667	-0.075245	-0.0159875	0.0321313	0.0190312	-0.00302625	-0.154785	0.0258075	-0.0676063	-0.0970975	0.0238425	-0.0107238	-0.266471	0.00497875	-0.010005	0.0859638	0.0110487	0.116237	0.288895	0.028775	0.0051	-0.204635
YDL133C-A	RPL41B	Ribosomal 60S subunit protein L41B; comprises only 25 amino acids; rpl41a rpl41b double null mutant is viable; homologous to mammalian ribosomal protein L41, no bacterial homolog; RPL41B has a paralog, RPL41A, that arose from the whole genome duplication	-0.03718	0.2423	-0.00185	0.195307	-0.0369475	0.0179412	-0.0994475	-0.163412	-0.139805	0.0883537	-0.0295513	0.03207	0.0808175	-0.0823437	-0.0534925	0.0527388	0.0094725	-0.01029	-0.00737	-0.00152125	0.0203925	-0.03107	0.0273212	-0.24268	0.218666	0.010725	-0.0843925	0.15962
YDL134C	PPH21	Catalytic subunit of protein phosphatase 2A (PP2A); functionally redundant with Pph22p; methylated at C terminus; forms alternate complexes with several regulatory subunits; involved in signal transduction and regulation of mitosis; forms nuclear foci upon DNA replication stress; PPH21 has a paralog, PPH22, that arose from the whole genome duplication	0.143797	0.00067625	0.148154	-0.0242625	0.149799	0.0052825	-0.121143	0.178254	0.0273875	0.161446	0.102399	-0.00296125	0.06462	-0.084425	0.0136487	0.0796975	0.147719	0.0354425	0.159194	0.11075	0.120346	-0.0864487	-0.155344	0.25197	0.180125	0.125472	-0.16259	-0.140415
YDL135C	RDI1	Rho GDP dissociation inhibitor; involved in the localization and regulation of Cdc42p and Rho1p; protein abundance increases in response to DNA replication stress	-0.0883225	-0.0287637	-0.003795	0.0027125	0.0396175	0.0370925	-0.04182	0.275161	0.0418375	0.0468013	-0.0292337	-0.0833875	-0.0050175	0.0241975	-0.0298825	-0.0223575	-0.0185875	-0.02098	0.0130025	-0.024705	0.0223187	-0.02738	0.0345075	-0.171875	0.0043225	-0.248154	-0.137964	-0.240764
YDL136W	RPL35B	Ribosomal 60S subunit protein L35B; homologous to mammalian ribosomal protein L35 and bacterial L29; RPL35B has a paralog, RPL35A, that arose from the whole genome duplication	-0.384015	0.0837875	-0.03185	-0.132867	0.02391		0.35561	-0.071245	-0.003695	-0.127968	0.03478		-0.110982	-0.115642	-0.111125	-0.32725	-0.153268		-0.04323		-0.10262	-0.17755	0.240365	0.251727	0.03865	-0.254675	0.207813	0.161454
YDL137W	ARF2	ADP-ribosylation factor; GTPase of the Ras superfamily involved in regulation of coated formation vesicles in intracellular trafficking within the Golgi; ARF2 has a paralog, ARF1, that arose from the whole genome duplication; arf1 arf2 double null mutation is complemented by human ARF1, ARF4, ARF5, or ARF6	0.14743	-0.0668475	-0.015305	0.0275712	-0.03594	0.00224875	0.00622625	-0.0236887	-0.191246	-0.0228225	0.0148625	-0.136775	-0.0320862	-0.0211925	0.0106912	-0.00434875	-0.0360362	0.0194175	-0.0357188	-0.01288	0.0303113	0.008205	-0.00579875	-0.28602	-0.0525975	-0.140137	-0.14029	-0.179347
YDL138W	RGT2	Plasma membrane high glucose sensor that regulates glucose transport; low affinity sesnor that contains 12 predicted transmembrane segments and a long C-terminal tail required for hexose transporter induction; phosphorylation of the tail by Yck1p/Yck2p facilitates binding to the HXT co-repressors, Mth1p and Std1p; RGT2 has a paralog, SNF3, that arose from the whole genome duplication	-0.020735	-0.945509	0.105629	-0.0661338		-0.02246	0.00661625	0.229645	-0.0465713	-0.0436975	-0.084365	0.00766125	-0.0075325	-0.00767875	-0.01013	0.0031975	-0.0490462	0.00021375	0.02429	-0.0710725	-0.0150725	-0.0777625	0.0720362
YDL139C	SCM3	Nonhistone component of centromeric chromatin; binds to histone H3 variant, Cse4p, and recruits it to centromeres; involved in the assembly and maintenance of Cse4-H4 at centromeres; required for kinetochore assembly and G2/M progression; may protect Cse4p from ubiquitination; homolog of mammalian HJURP	0.00664625	-0.142955	-0.0531312	-0.164997	1.97838	0.211663	0.533256	0.291669	-0.0141275	0.0432063	-0.157374	0.0835362	-0.0125313	0.253808	-0.400852	-0.106637	-0.135035	0.400886	0.391429	0.605452	-0.0475013	0.02936	0.203937	1.14285	-0.234304	0.338583	0.037685	-0.190149
[truncated: 5,404 more rows]
